# Supplementary material for: Identifying Potential Tumor Antigens and Antigens-Related Subtypes in Hepatocellular Carcinoma for mRNA Vaccine Development
Source: Hindawi journal article supplement (doi:10.1155/2022/6851026), 2022-08-29
Supplement: f1 [file 6851026.f1.zip]

Table 3.Differently Expressed Genes Analysis from cbioprol.Differential Expression Analysis from GI

| Gene name | gene     | Normal  | Cancer  | FC     | P        |
|-----------|----------|---------|---------|--------|----------|
| AADAT     | ENSG0000 | 1.83    | 11.5    | -2.143 | 8.81E-52 |
| AASS      | ENSG0000 | 3.24    | 11.16   | -1.52  | 9.03E-20 |
| AATF      | ENSG0000 | 29.171  | 10.64   | 1.374  | 3.60E-73 |
| ABCA8     | ENSG0000 | 3.33    | 13.07   | -1.7   | 4.52E-35 |
| ABCA9     | ENSG0000 | 0.63    | 3.27    | -1.389 | 1.21E-33 |
| ABCB6     | ENSG0000 | 39.371  | 18.615  | 1.041  | 8.28E-19 |
| ABCC6P2   | ENSG0000 | 8.95    | 3.735   | 1.071  | 3.34E-29 |
| ABCC9     | ENSG0000 | 2.25    | 6.825   | -1.268 | 3.07E-26 |
| ABHD12    | ENSG0000 | 35.671  | 12.07   | 1.488  | 3.60E-75 |
| ABLIM3    | ENSG0000 | 12.69   | 37.135  | -1.478 | 3.05E-29 |
| AC004538  | ENSG0000 | 0.14    | 2.04    | -1.415 | 9.74E-43 |
| AC004540  | ENSG0000 | 0.17    | 1.654   | -1.182 | 1.94E-25 |
| AC005077  | ENSG0000 | 0.52    | 6.74    | -2.348 | 2.36E-51 |
| AC005255  | ENSG0000 | 3.45    | 0       | 2.154  | 6.77E-37 |
| AC005943  | ENSG0000 | 1.38    | 0       | 1.251  | 8.76E-11 |
| AC005943  | ENSG0000 | 2.24    | 0       | 1.696  | 5.01E-03 |
| AC006128  | ENSG0000 | 1.15    | 7.035   | -1.902 | 1.11E-20 |
| AC007318  | ENSG0000 | 4.63    | 1.58    | 1.126  | 1.13E-24 |
| AC009065  | ENSG0000 | 1.34    | 0       | 1.227  | 9.02E-31 |
| AC009120  | ENSG0000 | 1.99    | 5.625   | -1.148 | 4.51E-07 |
| AC009963  | ENSG0000 | 12.75   | 43.499  | -1.694 | 7.81E-18 |
| AC012146  | ENSG0000 | 5.99    | 2.17    | 1.141  | 8.25E-30 |
| AC016292  | ENSG0000 | 2.15    | 0.485   | 1.085  | 2.75E-23 |
| AC016739  | ENSG0000 | 12.83   | 4.745   | 1.267  | 4.16E-35 |
| AC016747  | ENSG0000 | 4.32    | 1.61    | 1.027  | 9.53E-37 |
| AC068535  | ENSG0000 | 1.62    | 9.54    | -2.008 | 3.12E-22 |
| AC092171  | ENSG0000 | 2.23    | 0.56    | 1.05   | 2.10E-36 |
| AC093673  | ENSG0000 | 5.26    | 2.085   | 1.021  | 1.12E-24 |
| AC099668  | ENSG0000 | 2.33    | 10.819  | -1.828 | 3.09E-21 |
| AC104534  | ENSG0000 | 5.81    | 0.42    | 2.262  | 6.03E-12 |
| AC104809  | ENSG0000 | 0.04    | 3.375   | -2.073 | 1.11E-34 |
| AC132217  | ENSG0000 | 21.11   | 365.062 | -4.049 | 3.36E-12 |
| AC138035  | ENSG0000 | 0.6     | 3.465   | -1.481 | 7.14E-22 |
| AC239868  | ENSG0000 | 22.92   | 4.91    | 2.017  | 4.33E-23 |
| AC239868  | ENSG0000 | 22.92   | 4.91    | 2.017  | 4.33E-23 |
| ACACB     | ENSG0000 | 8.47    | 23.61   | -1.378 | 2.85E-25 |
| ACAD11    | ENSG0000 | 12.74   | 40.844  | -1.607 | 7.07E-44 |
| ACADL     | ENSG0000 | 2.9     | 8.555   | -1.293 | 3.27E-23 |
| ACADS     | ENSG0000 | 39.17   | 97.48   | -1.294 | 1.55E-37 |
| ACADVL    | ENSG0000 | 359.313 | 861.913 | -1.26  | 2.35E-22 |
| ACAP3     | ENSG0000 | 7.86    | 17.3    | -1.046 | 7.95E-04 |
| ACBD6     | ENSG0000 | 24.71   | 9.845   | 1.245  | 2.08E-59 |
| ACCS      | ENSG0000 | 6.22    | 14.189  | -1.073 | 6.11E-12 |
| ACLY      | ENSG0000 | 20.91   | 8.174   | 1.256  | 5.83E-28 |
| ACOT12    | ENSG0000 | 13.96   | 29.518  | -1.029 | 2.17E-12 |
| ACP5      | ENSG0000 | 22.77   | 9.84    | 1.133  | 2.02E-08 |
| ACP6      | ENSG0000 | 18.6    | 8.69    | 1.016  | 6.14E-32 |
| ACSL1     | ENSG0000 | 129.984 | 406.58  | -1.638 | 4.55E-31 |
| ACSL4     | ENSG0000 | 33.02   | 2.355   | 3.342  | 4.63E-30 |
| ACSM1     | ENSG0000 | 8.56    | 1.085   | 2.197  | 2.43E-16 |
| ACSM3     | ENSG0000 | 18.45   | 58.215  | -1.606 | 1.69E-24 |
| ACSM5     | ENSG0000 | 28.829  | 79.263  | -1.428 | 1.12E-22 |
| ACTN4     | ENSG0000 | 102.749 | 47.2    | 1.106  | 1.82E-31 |
| ADAM15    | ENSG0000 | 42.241  | 16.735  | 1.286  | 1.78E-44 |
| ADAMTS1   | ENSG0000 | 3.15    | 7.81    | -1.086 | 8.91E-16 |
| ADAMTS1   | ENSG0000 | 2.32    | 14.475  | -2.221 | 1.49E-97 |

|          |          |         |         |        |          |
|----------|----------|---------|---------|--------|----------|
| ADAMTS2  | ENSG0000 | 1.37    | 4.445   | -1.2   | 2.95E-16 |
| ADAMTSL  | ENSG0000 | 3.15    | 11.359  | -1.574 | 3.48E-25 |
| ADAT2    | ENSG0000 | 1.23    | 3.685   | -1.071 | 1.97E-11 |
| ADCK2    | ENSG0000 | 14.49   | 5.585   | 1.234  | 6.84E-62 |
| ADCY1    | ENSG0000 | 0.4     | 4.115   | -1.869 | 5.43E-29 |
| ADGRA3   | ENSG0000 | 8.9     | 21.525  | -1.186 | 8.54E-24 |
| ADGRG7   | ENSG0000 | 0.72    | 4.425   | -1.657 | 4.94E-46 |
| ADH1B    | ENSG0000 | 360.135 | 884.396 | -1.294 | 5.15E-11 |
| ADH4     | ENSG0000 | 154.032 | 549.147 | -1.827 | 2.35E-13 |
| ADIPOR1  | ENSG0000 | 66.791  | 32.8    | 1.004  | 1.88E-43 |
| ADM2     | ENSG0000 | 2.8     | 0.75    | 1.119  | 3.37E-20 |
| ADRA1A   | ENSG0000 | 0.75    | 16.38   | -3.312 | 2.62E-82 |
| ADRA1B   | ENSG0000 | 1.21    | 3.855   | -1.135 | 8.39E-31 |
| ADRA2B   | ENSG0000 | 0.41    | 1.885   | -1.033 | 4.15E-50 |
| ADSL     | ENSG0000 | 31.91   | 14.58   | 1.079  | 1.69E-44 |
| AF064858 | ENSG0000 | 0.81    | 3.285   | -1.243 | 3.50E-13 |
| AFG3L1P  | ENSG0000 | 3.2     | 8.22    | -1.134 | 2.33E-10 |
| AFM      | ENSG0000 | 50.38   | 143.334 | -1.49  | 1.15E-19 |
| AFP      | ENSG0000 | 11.46   | 4.685   | 1.132  | 2.19E-11 |
| AGAP4    | ENSG0000 | 2.28    | 5.63    | -1.015 | 5.30E-08 |
| AGAP5    | ENSG0000 | 1.11    | 3.235   | -1.005 | 3.29E-11 |
| AGAP6    | ENSG0000 | 3.38    | 12.338  | -1.607 | 1.98E-13 |
| AGAP9    | ENSG0000 | 2.16    | 10.75   | -1.895 | 3.89E-19 |
| AGBL5    | ENSG0000 | 8.21    | 3.445   | 1.051  | 2.57E-39 |
| AGER     | ENSG0000 | 1.41    | 4.07    | -1.073 | 5.63E-10 |
| AGPAT1   | ENSG0000 | 46.821  | 21.794  | 1.069  | 7.90E-49 |
| AGXT2    | ENSG0000 | 13.63   | 35.03   | -1.3   | 1.27E-23 |
| AHSA2    | ENSG0000 | 10.42   | 24.35   | -1.15  | 2.24E-02 |
| AIDA     | ENSG0000 | 24.519  | 10.875  | 1.104  | 1.27E-46 |
| AIM1L    | ENSG0000 | 1.81    | 0.17    | 1.264  | 1.32E-33 |
| AIMP2    | ENSG0000 | 27.651  | 13.26   | 1.007  | 1.33E-32 |
| AKAP17A  | ENSG0000 | 10.16   | 25.474  | -1.246 | 3.02E-09 |
| AKIP1    | ENSG0000 | 12.78   | 5.335   | 1.121  | 7.69E-50 |
| AKR1B10  | ENSG0000 | 177.158 | 3.015   | 5.472  | 9.84E-30 |
| AKR1C1   | ENSG0000 | 481.068 | 212.636 | 1.174  | 9.13E-08 |
| AKR1C2   | ENSG0000 | 299.123 | 125.148 | 1.25   | 8.98E-05 |
| AKR1C3   | ENSG0000 | 351.236 | 89.588  | 1.959  | 3.03E-46 |
| AKR1C8P  | ENSG0000 | 0.26    | 1.74    | -1.121 | 2.75E-20 |
| AKR1D1   | ENSG0000 | 10.96   | 40.685  | -1.801 | 1.01E-11 |
| AKR7L    | ENSG0000 | 4.43    | 14.072  | -1.473 | 1.15E-28 |
| AL158801 | ENSG0000 | 2.19    | 0.275   | 1.323  | 4.13E-33 |
| AL161668 | ENSG0000 | 1.63    | 5.785   | -1.367 | 3.53E-22 |
| AL162151 | ENSG0000 | 202.151 | 43.611  | 2.187  | 1.42E-02 |
| ALDH1A1  | ENSG0000 | 458.284 | 217.994 | 1.068  | 2.39E-10 |
| ALDH3A1  | ENSG0000 | 2.17    | 0.46    | 1.119  | 7.82E-12 |
| ALDH8A1  | ENSG0000 | 27.029  | 64.679  | -1.229 | 3.10E-22 |
| ALDOA    | ENSG0000 | 289.595 | 130.929 | 1.139  | 1.02E-26 |
| ALG1     | ENSG0000 | 19.83   | 8.77    | 1.092  | 3.96E-57 |
| ALG1L    | ENSG0000 | 7.27    | 0.325   | 2.642  | 9.46E-43 |
| ALG3     | ENSG0000 | 57.289  | 26.005  | 1.11   | 3.84E-51 |
| ALG8     | ENSG0000 | 45.711  | 19.841  | 1.164  | 3.48E-66 |
| ALKBH2   | ENSG0000 | 25.259  | 11.915  | 1.024  | 4.09E-37 |
| ALMS1    | ENSG0000 | 5       | 1.79    | 1.105  | 1.28E-57 |
| ALOX12P2 | ENSG0000 | 1.39    | 6.128   | -1.577 | 2.52E-25 |
| ALPL     | ENSG0000 | 10.67   | 40.58   | -1.833 | 1.71E-26 |
| ALYREF   | ENSG0000 | 37.749  | 13.9    | 1.379  | 1.14E-52 |
| AMDHD1   | ENSG0000 | 23.48   | 51.479  | -1.1   | 6.39E-15 |
| AMN      | ENSG0000 | 9.84    | 21.844  | -1.075 | 1.73E-06 |

|           |          |          |          |        |          |
|-----------|----------|----------|----------|--------|----------|
| ANAPC11   | ENSG0000 | 192.35   | 76.061   | 1.327  | 1.35E-65 |
| ANGPTL6   | ENSG0000 | 1.67     | 11.6     | -2.238 | 1.35E-96 |
| ANK3      | ENSG0000 | 1.01     | 3.435    | -1.142 | 6.39E-15 |
| ANKRD29   | ENSG0000 | 3.48     | 0.61     | 1.476  | 6.70E-29 |
| ANKRD39   | ENSG0000 | 14.36    | 6.27     | 1.079  | 4.26E-64 |
| ANLN      | ENSG0000 | 2.26     | 0.175    | 1.472  | 2.75E-40 |
| ANO10     | ENSG0000 | 10.95    | 4.33     | 1.165  | 1.20E-42 |
| ANXA10    | ENSG0000 | 10.59    | 34.34    | -1.608 | 2.59E-18 |
| ANXA11    | ENSG0000 | 86.99    | 38.454   | 1.157  | 3.81E-43 |
| ANXA13    | ENSG0000 | 7.52     | 2.45     | 1.304  | 2.16E-08 |
| ANXA2     | ENSG0000 | 254.866  | 63.065   | 1.998  | 1.96E-44 |
| ANXA2P2   | ENSG0000 | 4.42     | 0.755    | 1.627  | 1.14E-37 |
| AP000349. | ENSG0000 | 1.28     | 0.03     | 1.146  | 1.78E-25 |
| AP000355. | ENSG0000 | 0.63     | 2.28     | -1.009 | 1.62E-16 |
| AP003391. | ENSG0000 | 2.06     | 0        | 1.614  | 1.08E-03 |
| AP006285. | ENSG0000 | 0.47     | 2.525    | -1.262 | 4.77E-13 |
| AP006285. | ENSG0000 | 0.06     | 1.265    | -1.095 | 2.02E-45 |
| AP1M2     | ENSG0000 | 2.83     | 0.56     | 1.296  | 4.23E-15 |
| AP1S1     | ENSG0000 | 45.54    | 17.135   | 1.36   | 4.79E-61 |
| AP3B1     | ENSG0000 | 16.49    | 6.325    | 1.256  | 6.45E-72 |
| APIP      | ENSG0000 | 18.439   | 8.705    | 1.002  | 1.29E-36 |
| APLN      | ENSG0000 | 1.59     | 0.1      | 1.235  | 3.06E-34 |
| APOA1BP   | ENSG0000 | 120.684  | 38.634   | 1.618  | 9.18E-90 |
| APOA2     | ENSG0000 | 31278.85 | 10880.07 | 1.523  | 9.24E-04 |
| APOA4     | ENSG0000 | 3.03     | 26.19    | -2.754 | 1.79E-07 |
| APOA5     | ENSG0000 | 97.267   | 211.834  | -1.115 | 5.78E-13 |
| APOBEC3E  | ENSG0000 | 2.34     | 0.22     | 1.453  | 2.35E-29 |
| APOC2     | ENSG0000 | 2260.615 | 475.779  | 2.246  | 3.11E-13 |
| APOE      | ENSG0000 | 5880.405 | 2771.689 | 1.085  | 8.27E-14 |
| APOF      | ENSG0000 | 17.701   | 113.668  | -2.616 | 2.62E-38 |
| APOLD1    | ENSG0000 | 4.3      | 1.215    | 1.259  | 1.19E-25 |
| AQP3      | ENSG0000 | 24.599   | 60.915   | -1.274 | 4.29E-21 |
| ARF1      | ENSG0000 | 269.025  | 132.775  | 1.013  | 3.51E-42 |
| ARF3      | ENSG0000 | 30.759   | 14.79    | 1.008  | 1.65E-30 |
| ARGLU1    | ENSG0000 | 17.771   | 38.953   | -1.09  | 4.10E-06 |
| ARHGAP11  | ENSG0000 | 1.86     | 5.19     | -1.114 | 4.07E-22 |
| ARHGEF39  | ENSG0000 | 1.81     | 0.4      | 1.005  | 1.83E-36 |
| ARL2      | ENSG0000 | 24.729   | 8.94     | 1.372  | 6.90E-39 |
| ARPC1A    | ENSG0000 | 87.772   | 39.045   | 1.148  | 8.56E-59 |
| ARPC1B    | ENSG0000 | 99.181   | 38.33    | 1.349  | 1.13E-27 |
| ARPC3     | ENSG0000 | 174.634  | 81.089   | 1.097  | 8.44E-55 |
| ARPC5     | ENSG0000 | 86.762   | 29.82    | 1.51   | 3.85E-56 |
| ARRDC2    | ENSG0000 | 15.5     | 7.085    | 1.029  | 1.11E-14 |
| ARSE      | ENSG0000 | 49.9     | 23       | 1.085  | 9.66E-07 |
| ARSEP1    | ENSG0000 | 2.5      | 0.09     | 1.683  | 1.24E-10 |
| ARV1      | ENSG0000 | 17.67    | 8.02     | 1.049  | 3.26E-45 |
| ASF1B     | ENSG0000 | 3.27     | 0.28     | 1.738  | 7.91E-48 |
| ASMTL-AS  | ENSG0000 | 3.23     | 11.1     | -1.516 | 3.17E-06 |
| ASNA1     | ENSG0000 | 43.761   | 17.964   | 1.239  | 1.73E-56 |
| ASPDH     | ENSG0000 | 33.751   | 71.634   | -1.064 | 4.55E-11 |
| ASPG      | ENSG0000 | 7.77     | 75.475   | -3.124 | 8.33E-41 |
| ASPH      | ENSG0000 | 41.04    | 16.18    | 1.291  | 4.24E-21 |
| ASPM      | ENSG0000 | 2.96     | 0.125    | 1.816  | 8.72E-54 |
| ATAD2     | ENSG0000 | 6.91     | 1.855    | 1.47   | 1.16E-38 |
| ATF3      | ENSG0000 | 14.94    | 36.796   | -1.246 | 2.39E-11 |
| ATF5      | ENSG0000 | 145.946  | 767.753  | -2.387 | 6.51E-30 |
| ATHL1     | ENSG0000 | 9.89     | 26.485   | -1.336 | 7.22E-03 |
| ATIC      | ENSG0000 | 66.201   | 32.119   | 1.021  | 1.34E-34 |

|           |          |         |          |        |          |
|-----------|----------|---------|----------|--------|----------|
| ATOH8     | ENSG0000 | 4.42    | 18.95    | -1.88  | 2.47E-30 |
| ATOX1     | ENSG0000 | 347.29  | 114.178  | 1.596  | 6.63E-63 |
| ATP1A1    | ENSG0000 | 136.342 | 51.872   | 1.377  | 1.61E-31 |
| ATP1B1    | ENSG0000 | 97.951  | 37.295   | 1.37   | 1.12E-29 |
| ATP1B3    | ENSG0000 | 21.14   | 8.2      | 1.267  | 1.30E-18 |
| ATP5E     | ENSG0000 | 77.471  | 33.549   | 1.184  | 5.86E-58 |
| ATP5G1    | ENSG0000 | 239.967 | 89.216   | 1.417  | 2.90E-65 |
| ATP5G2    | ENSG0000 | 428.751 | 189.499  | 1.174  | 3.40E-74 |
| ATP5H     | ENSG0000 | 378.119 | 168.709  | 1.16   | 5.68E-70 |
| ATP5J2    | ENSG0000 | 584.111 | 238.425  | 1.289  | 2.71E-73 |
| ATP5J2-P1 | ENSG0000 | 3.96    | 1.075    | 1.257  | 3.69E-31 |
| ATP5L     | ENSG0000 | 304.183 | 126.381  | 1.261  | 4.57E-59 |
| ATP6AP1   | ENSG0000 | 65.639  | 24.015   | 1.414  | 1.58E-72 |
| ATP6V0B   | ENSG0000 | 142.339 | 68.669   | 1.041  | 8.52E-40 |
| ATP6V0E1  | ENSG0000 | 207.691 | 99.105   | 1.06   | 2.92E-53 |
| ATP6V1C1  | ENSG0000 | 16.8    | 6.985    | 1.157  | 5.23E-30 |
| ATP6V1D   | ENSG0000 | 38.409  | 18.475   | 1.017  | 3.53E-39 |
| ATP6V1E1  | ENSG0000 | 67.568  | 28.939   | 1.196  | 3.07E-53 |
| ATP6V1F   | ENSG0000 | 102.047 | 36.464   | 1.46   | 5.33E-67 |
| ATP6V1H   | ENSG0000 | 23.62   | 11.17    | 1.016  | 1.12E-44 |
| ATRAID    | ENSG0000 | 74.109  | 34.835   | 1.068  | 2.28E-55 |
| ATRN      | ENSG0000 | 27.481  | 10.28    | 1.336  | 3.10E-24 |
| AURKA     | ENSG0000 | 7.35    | 0.99     | 2.069  | 2.38E-56 |
| AURKB     | ENSG0000 | 5.25    | 0.53     | 2.03   | 3.98E-50 |
| AUTS2     | ENSG0000 | 3.86    | 9.375    | -1.094 | 2.28E-16 |
| AVPR1A    | ENSG0000 | 0.47    | 5.405    | -2.123 | 1.46E-24 |
| AZGP1     | ENSG0000 | 569.518 | 1221.805 | -1.1   | 5.97E-16 |
| AZGP1P1   | ENSG0000 | 6.43    | 19.275   | -1.448 | 8.77E-28 |
| B3GAT1    | ENSG0000 | 0.11    | 1.63     | -1.245 | 5.52E-11 |
| B3GNT3    | ENSG0000 | 2.33    | 0.495    | 1.155  | 1.36E-10 |
| B3GNT5    | ENSG0000 | 2.3     | 0.45     | 1.186  | 1.39E-19 |
| B9D1      | ENSG0000 | 10.26   | 3.88     | 1.206  | 3.33E-37 |
| BAG6      | ENSG0000 | 179.805 | 88.398   | 1.016  | 1.81E-55 |
| BAMBI     | ENSG0000 | 13.81   | 6.22     | 1.036  | 1.44E-05 |
| BANF1     | ENSG0000 | 152.165 | 69.61    | 1.117  | 1.06E-68 |
| BAX       | ENSG0000 | 78.71   | 24.245   | 1.659  | 1.38E-59 |
| BBOX1     | ENSG0000 | 2.69    | 11.375   | -1.746 | 1.48E-11 |
| BCAM      | ENSG0000 | 57.46   | 21.915   | 1.351  | 2.50E-22 |
| BCAP31    | ENSG0000 | 202.657 | 70.416   | 1.512  | 1.98E-72 |
| BCAS4     | ENSG0000 | 1.85    | 0.41     | 1.015  | 2.00E-31 |
| BCHE      | ENSG0000 | 17.321  | 38.95    | -1.125 | 8.65E-13 |
| BCL2L12   | ENSG0000 | 19.401  | 8.03     | 1.176  | 9.33E-50 |
| BCL3      | ENSG0000 | 31.12   | 75.011   | -1.243 | 2.34E-15 |
| BCL6      | ENSG0000 | 10.78   | 24.681   | -1.124 | 5.88E-13 |
| BCO2      | ENSG0000 | 2.42    | 31.444   | -3.246 | 8.54E-76 |
| BEX2      | ENSG0000 | 2.48    | 0.685    | 1.046  | 1.26E-11 |
| BGN       | ENSG0000 | 56.79   | 133.176  | -1.215 | 1.42E-13 |
| BHMT      | ENSG0000 | 58.582  | 197.176  | -1.734 | 1.51E-11 |
| BIRC5     | ENSG0000 | 6.81    | 0.505    | 2.376  | 1.57E-54 |
| BLOC1S1   | ENSG0000 | 213.441 | 94.87    | 1.161  | 2.56E-73 |
| BLVRA     | ENSG0000 | 19.46   | 3.145    | 2.303  | 3.46E-46 |
| BMPER     | ENSG0000 | 0.06    | 1.515    | -1.246 | 1.97E-87 |
| BMS1P8    | ENSG0000 | 1.92    | 0.11     | 1.395  | 1.45E-28 |
| BOLA1     | ENSG0000 | 26.79   | 11.355   | 1.169  | 3.78E-58 |
| BOLA2     | ENSG0000 | 10.8    | 2.74     | 1.658  | 3.31E-53 |
| BOLA2B    | ENSG0000 | 84.67   | 20.26    | 2.011  | 1.17E-74 |
| BOLA3     | ENSG0000 | 36.339  | 13.22    | 1.393  | 4.46E-65 |
| BOP1      | ENSG0000 | 28.041  | 9.04     | 1.532  | 7.46E-50 |

|           |          |         |         |        |          |
|-----------|----------|---------|---------|--------|----------|
| BPGM      | ENSG0000 | 8.15    | 3.535   | 1.013  | 3.91E-40 |
| BPNT1     | ENSG0000 | 13.67   | 6.01    | 1.065  | 1.24E-31 |
| BRIX1     | ENSG0000 | 13      | 5.58    | 1.089  | 2.97E-39 |
| BRMS1     | ENSG0000 | 30.751  | 11.85   | 1.305  | 3.54E-69 |
| BROX      | ENSG0000 | 10.95   | 4.735   | 1.059  | 1.51E-45 |
| BSG       | ENSG0000 | 301.329 | 101.335 | 1.563  | 1.20E-64 |
| BTF3      | ENSG0000 | 338.66  | 168.376 | 1.004  | 8.92E-46 |
| BTG3      | ENSG0000 | 8.55    | 3.095   | 1.222  | 8.12E-29 |
| BUB1      | ENSG0000 | 1.72    | 0.11    | 1.293  | 3.44E-40 |
| BUB1B     | ENSG0000 | 1.6     | 0.16    | 1.164  | 1.37E-34 |
| BUD31     | ENSG0000 | 64.382  | 29.16   | 1.116  | 6.44E-52 |
| BX842568. | ENSG0000 | 0.4     | 2.485   | -1.316 | 3.16E-30 |
| BYSL      | ENSG0000 | 12.53   | 4.635   | 1.264  | 2.49E-42 |
| BZW2      | ENSG0000 | 15.3    | 6.63    | 1.095  | 3.77E-34 |
| C10orf35  | ENSG0000 | 3.84    | 1.375   | 1.027  | 1.80E-18 |
| C11orf96  | ENSG0000 | 6.79    | 26.472  | -1.818 | 1.04E-24 |
| C11orf98  | ENSG0000 | 63.592  | 30.65   | 1.029  | 1.59E-48 |
| C12orf45  | ENSG0000 | 19.5    | 8.885   | 1.052  | 3.14E-58 |
| C12orf73  | ENSG0000 | 7.32    | 2.955   | 1.073  | 9.38E-59 |
| C12orf75  | ENSG0000 | 6.37    | 1.335   | 1.658  | 2.87E-18 |
| C14orf105 | ENSG0000 | 5.67    | 19.307  | -1.606 | 5.36E-20 |
| C14orf166 | ENSG0000 | 107.94  | 52.815  | 1.017  | 2.38E-65 |
| C14orf180 | ENSG0000 | 0.01    | 1.21    | -1.13  | 2.10E-53 |
| C15orf39  | ENSG0000 | 4.46    | 1.5     | 1.127  | 5.00E-32 |
| C15orf40  | ENSG0000 | 15.5    | 7.065   | 1.033  | 4.08E-49 |
| C15orf48  | ENSG0000 | 3.02    | 0.55    | 1.375  | 7.15E-16 |
| C16orf59  | ENSG0000 | 2.19    | 0.37    | 1.219  | 1.35E-39 |
| C17orf49  | ENSG0000 | 55.241  | 23.97   | 1.171  | 1.71E-42 |
| C17orf58  | ENSG0000 | 10.87   | 4.22    | 1.185  | 4.39E-59 |
| C17orf89  | ENSG0000 | 74.47   | 35.49   | 1.048  | 1.48E-45 |
| C19orf48  | ENSG0000 | 26.67   | 11.515  | 1.145  | 7.86E-38 |
| C19orf53  | ENSG0000 | 130.861 | 56.883  | 1.188  | 5.48E-67 |
| C19orf66  | ENSG0000 | 42.679  | 100.513 | -1.217 | 3.13E-30 |
| C1orf106  | ENSG0000 | 1.81    | 0.26    | 1.157  | 1.60E-19 |
| C1orf168  | ENSG0000 | 3.31    | 11.729  | -1.562 | 6.25E-32 |
| C1orf198  | ENSG0000 | 12.46   | 4.765   | 1.223  | 7.64E-27 |
| C1orf228  | ENSG0000 | 1.79    | 6.188   | -1.365 | 4.05E-27 |
| C1orf35   | ENSG0000 | 12.7    | 5.775   | 1.016  | 1.91E-48 |
| C1orf43   | ENSG0000 | 182.214 | 81.021  | 1.159  | 4.33E-62 |
| C1orf54   | ENSG0000 | 7.23    | 2.655   | 1.171  | 3.55E-24 |
| C1QA      | ENSG0000 | 81.492  | 39.245  | 1.035  | 1.34E-09 |
| C1QTNF1   | ENSG0000 | 4.54    | 17.865  | -1.768 | 5.91E-25 |
| C1QTNF5   | ENSG0000 | 11.43   | 5.08    | 1.032  | 2.00E-19 |
| C1R       | ENSG0000 | 414.692 | 877.009 | -1.079 | 1.34E-22 |
| C1RL-AS1  | ENSG0000 | 1.81    | 5.113   | -1.121 | 6.51E-12 |
| C20orf27  | ENSG0000 | 22.11   | 9.443   | 1.146  | 4.31E-49 |
| C2orf54   | ENSG0000 | 6.44    | 2.305   | 1.171  | 4.81E-06 |
| C3P1      | ENSG0000 | 11.36   | 51.089  | -2.075 | 5.67E-42 |
| C4A-AS1   | ENSG0000 | 2.72    | 10.738  | -1.658 | 2.36E-24 |
| C4B-AS1   | ENSG0000 | 2.72    | 10.738  | -1.658 | 2.36E-24 |
| C6        | ENSG0000 | 47.422  | 120.137 | -1.323 | 5.41E-20 |
| C6orf1    | ENSG0000 | 20.87   | 9.29    | 1.088  | 3.18E-43 |
| C6orf47   | ENSG0000 | 10.63   | 4.24    | 1.15   | 4.29E-35 |
| C6orf48   | ENSG0000 | 78.378  | 31.529  | 1.287  | 4.33E-40 |
| C6orf89   | ENSG0000 | 20.281  | 9.085   | 1.077  | 1.24E-38 |
| C7        | ENSG0000 | 5.88    | 49.485  | -2.875 | 7.22E-31 |
| C7orf50   | ENSG0000 | 47.619  | 20.535  | 1.175  | 3.79E-50 |
| C8A       | ENSG0000 | 73.338  | 173.446 | -1.231 | 4.02E-19 |

|         |          |         |         |        |          |
|---------|----------|---------|---------|--------|----------|
| C8orf33 | ENSG0000 | 18.379  | 7.305   | 1.223  | 4.89E-48 |
| C8orf4  | ENSG0000 | 12.81   | 58.63   | -2.11  | 1.62E-36 |
| C8orf46 | ENSG0000 | 1.62    | 5.51    | -1.313 | 2.86E-14 |
| C8orf59 | ENSG0000 | 87.069  | 34.17   | 1.324  | 3.10E-61 |
| C8orf76 | ENSG0000 | 19.81   | 8.225   | 1.174  | 8.54E-53 |
| C9      | ENSG0000 | 23.051  | 263.854 | -3.461 | 3.80E-35 |
| C9orf16 | ENSG0000 | 50.801  | 23.865  | 1.059  | 2.63E-38 |
| CACNA1H | ENSG0000 | 1.51    | 5.3     | -1.328 | 2.70E-03 |
| CACNB2  | ENSG0000 | 0.74    | 2.575   | -1.039 | 1.27E-15 |
| CACYBP  | ENSG0000 | 43.419  | 15.51   | 1.428  | 6.64E-39 |
| CADM1   | ENSG0000 | 40.07   | 14.41   | 1.414  | 1.01E-20 |
| CALM3   | ENSG0000 | 104.213 | 50.399  | 1.033  | 1.35E-34 |
| CALR    | ENSG0000 | 813.782 | 337.302 | 1.268  | 2.50E-47 |
| CAMK2B  | ENSG0000 | 0.24    | 2.31    | -1.416 | 1.36E-26 |
| CANT1   | ENSG0000 | 14.81   | 6.46    | 1.084  | 2.58E-39 |
| CANX    | ENSG0000 | 179.83  | 85.843  | 1.058  | 6.23E-29 |
| CAP2    | ENSG0000 | 8.86    | 1.345   | 2.072  | 3.05E-52 |
| CAPG    | ENSG0000 | 26.6    | 3.725   | 2.546  | 7.53E-36 |
| CAPN2   | ENSG0000 | 26.33   | 11.385  | 1.142  | 1.95E-25 |
| CAPN3   | ENSG0000 | 3.25    | 13.15   | -1.735 | 2.72E-26 |
| CAPNS1  | ENSG0000 | 328.51  | 144.006 | 1.184  | 3.25E-61 |
| CAPRIN1 | ENSG0000 | 35.17   | 17.019  | 1.005  | 9.85E-33 |
| CASC5   | ENSG0000 | 3.48    | 1.025   | 1.146  | 7.01E-22 |
| CASK    | ENSG0000 | 8.9     | 3.435   | 1.159  | 1.41E-26 |
| CAV1    | ENSG0000 | 11.49   | 4.81    | 1.104  | 7.21E-21 |
| CBFA2T3 | ENSG0000 | 0.57    | 2.535   | -1.171 | 1.29E-39 |
| CBR1    | ENSG0000 | 181.056 | 75.123  | 1.258  | 1.46E-21 |
| CBS     | ENSG0000 | 4.02    | 13.905  | -1.57  | 8.68E-05 |
| CBX1    | ENSG0000 | 14.33   | 5.675   | 1.2    | 2.02E-35 |
| CBX8    | ENSG0000 | 4.54    | 1.57    | 1.108  | 1.07E-43 |
| CCBE1   | ENSG0000 | 0.06    | 1.185   | -1.044 | 3.49E-54 |
| CCDC107 | ENSG0000 | 40.179  | 15.745  | 1.298  | 1.88E-61 |
| CCDC167 | ENSG0000 | 49.179  | 20.844  | 1.2    | 8.38E-48 |
| CCDC28B | ENSG0000 | 3.8     | 1.31    | 1.055  | 2.88E-26 |
| CCDC34  | ENSG0000 | 5.74    | 1.22    | 1.602  | 1.03E-51 |
| CCDC64  | ENSG0000 | 4.25    | 1.51    | 1.065  | 1.30E-13 |
| CCDC80  | ENSG0000 | 4.3     | 1.31    | 1.198  | 5.83E-10 |
| CCDC84  | ENSG0000 | 6.33    | 15.905  | -1.206 | 2.85E-05 |
| CCDC86  | ENSG0000 | 12.32   | 4.795   | 1.201  | 1.91E-38 |
| CCHCR1  | ENSG0000 | 11.72   | 4.52    | 1.204  | 6.93E-41 |
| CCL14   | ENSG0000 | 7.25    | 46.812  | -2.535 | 1.04E-34 |
| CCL15   | ENSG0000 | 29.421  | 9.305   | 1.562  | 1.09E-23 |
| CCL18   | ENSG0000 | 2.04    | 0.51    | 1.01   | 1.72E-11 |
| CCL19   | ENSG0000 | 2.7     | 8.89    | -1.418 | 1.65E-06 |
| CCL20   | ENSG0000 | 22.42   | 1.5     | 3.228  | 7.05E-19 |
| CCL21   | ENSG0000 | 7.73    | 17.895  | -1.114 | 1.21E-05 |
| CCL23   | ENSG0000 | 0.22    | 2.155   | -1.371 | 1.11E-67 |
| CCNA2   | ENSG0000 | 2.96    | 0.455   | 1.445  | 1.85E-36 |
| CCNB1   | ENSG0000 | 14.8    | 0.9     | 3.056  | 1.24E-71 |
| CCNB2   | ENSG0000 | 4.81    | 0.27    | 2.194  | 3.46E-57 |
| CCNE1   | ENSG0000 | 1.55    | 0.22    | 1.064  | 5.34E-30 |
| CCNL1   | ENSG0000 | 21.84   | 60.633  | -1.432 | 8.69E-22 |
| CCNL2   | ENSG0000 | 33.029  | 101.006 | -1.584 | 1.99E-10 |
| CCT3    | ENSG0000 | 185.734 | 51.09   | 1.842  | 3.78E-87 |
| CCT4    | ENSG0000 | 57.519  | 25.355  | 1.151  | 2.01E-54 |
| CCT5    | ENSG0000 | 82.509  | 34.429  | 1.237  | 3.35E-42 |
| CCT6A   | ENSG0000 | 83.169  | 34.536  | 1.244  | 1.14E-46 |
| CCT7    | ENSG0000 | 105.829 | 49.213  | 1.089  | 1.59E-57 |

|           |          |         |         |        |          |
|-----------|----------|---------|---------|--------|----------|
| CD151     | ENSG0000 | 152.704 | 70.965  | 1.095  | 6.23E-29 |
| CD163L1   | ENSG0000 | 2.63    | 0.49    | 1.285  | 1.64E-30 |
| CD1D      | ENSG0000 | 1.31    | 5.54    | -1.501 | 6.84E-32 |
| CD24      | ENSG0000 | 50.85   | 6.745   | 2.743  | 5.43E-13 |
| CD248     | ENSG0000 | 3.79    | 1.195   | 1.126  | 1.40E-25 |
| CD2BP2    | ENSG0000 | 24.97   | 9.89    | 1.254  | 4.12E-56 |
| CD320     | ENSG0000 | 20.33   | 9.475   | 1.026  | 1.42E-40 |
| CD34      | ENSG0000 | 14.17   | 1.625   | 2.531  | 8.03E-94 |
| CD36      | ENSG0000 | 16.32   | 7.178   | 1.083  | 7.68E-10 |
| CD3D      | ENSG0000 | 4.12    | 1.295   | 1.158  | 2.24E-16 |
| CD5L      | ENSG0000 | 1.35    | 3.725   | -1.008 | 2.12E-11 |
| CD63      | ENSG0000 | 685.588 | 273.832 | 1.321  | 1.84E-54 |
| CD74      | ENSG0000 | 753.727 | 185.354 | 2.018  | 1.25E-25 |
| CDA       | ENSG0000 | 15.42   | 32.819  | -1.042 | 2.27E-14 |
| CDC123    | ENSG0000 | 33.16   | 16.075  | 1      | 6.77E-45 |
| CDC20     | ENSG0000 | 9.32    | 0.31    | 2.978  | 3.93E-63 |
| CDC25C    | ENSG0000 | 1.84    | 0.055   | 1.429  | 3.83E-53 |
| CDC45     | ENSG0000 | 3.07    | 0.32    | 1.624  | 7.92E-45 |
| CDC6      | ENSG0000 | 2.44    | 0.365   | 1.334  | 8.64E-29 |
| CDCA3     | ENSG0000 | 5.67    | 0.685   | 1.985  | 4.65E-50 |
| CDCA5     | ENSG0000 | 3.89    | 0.275   | 1.939  | 6.90E-56 |
| CDCA8     | ENSG0000 | 2.69    | 0.29    | 1.516  | 7.21E-44 |
| CDH13     | ENSG0000 | 3.25    | 0.32    | 1.687  | 2.95E-66 |
| CDHR2     | ENSG0000 | 1.82    | 16.165  | -2.606 | 1.02E-28 |
| CDK1      | ENSG0000 | 6.32    | 0.33    | 2.46   | 7.38E-61 |
| CDK11A    | ENSG0000 | 11.85   | 26.269  | -1.086 | 7.63E-07 |
| CDK4      | ENSG0000 | 47.33   | 19.38   | 1.246  | 1.22E-41 |
| CDK5      | ENSG0000 | 12.8    | 4.67    | 1.283  | 5.06E-63 |
| CDKN2A    | ENSG0000 | 10.79   | 0.315   | 3.164  | 9.92E-63 |
| CDKN2AIP  | ENSG0000 | 16.91   | 6.3     | 1.295  | 5.74E-71 |
| CDKN2B    | ENSG0000 | 2.03    | 0.37    | 1.145  | 2.24E-30 |
| CDKN2C    | ENSG0000 | 7.91    | 1.415   | 1.883  | 4.49E-54 |
| CDKN3     | ENSG0000 | 10.96   | 0.45    | 3.044  | 4.14E-74 |
| CDT1      | ENSG0000 | 3.68    | 0.265   | 1.887  | 1.30E-49 |
| CENPA     | ENSG0000 | 2.09    | 0.12    | 1.464  | 6.70E-44 |
| CENPF     | ENSG0000 | 6.14    | 0.295   | 2.463  | 1.12E-53 |
| CENPH     | ENSG0000 | 3.04    | 0.59    | 1.345  | 7.84E-51 |
| CENPK     | ENSG0000 | 1.51    | 0.24    | 1.017  | 2.37E-30 |
| CENPL     | ENSG0000 | 1.82    | 0.34    | 1.073  | 8.02E-41 |
| CENPM     | ENSG0000 | 5.97    | 0.33    | 2.39   | 8.75E-58 |
| CENPN     | ENSG0000 | 6.1     | 2.08    | 1.205  | 4.90E-38 |
| CENPU     | ENSG0000 | 4.69    | 0.885   | 1.594  | 4.48E-42 |
| CENPW     | ENSG0000 | 8.1     | 1.1     | 2.115  | 3.78E-62 |
| CEP131    | ENSG0000 | 5.98    | 2.185   | 1.132  | 3.42E-49 |
| CES3      | ENSG0000 | 7.32    | 16.224  | -1.05  | 1.23E-13 |
| CES4A     | ENSG0000 | 1.93    | 10.081  | -1.919 | 1.34E-22 |
| CETN2     | ENSG0000 | 20.93   | 9.26    | 1.096  | 3.54E-44 |
| CFHR3     | ENSG0000 | 33.541  | 174.664 | -2.346 | 3.33E-15 |
| CFL1      | ENSG0000 | 437.093 | 184.272 | 1.242  | 1.62E-54 |
| CFP       | ENSG0000 | 2.32    | 8.934   | -1.581 | 3.12E-36 |
| CGREF1    | ENSG0000 | 9.8     | 4.105   | 1.081  | 7.12E-12 |
| CH17-1312 | ENSG0000 | 1.3     | 0.105   | 1.058  | 2.82E-10 |
| CH17-340  | ENSG0000 | 9.38    | 4.11    | 1.022  | 8.62E-42 |
| CHAF1A    | ENSG0000 | 5.12    | 1.39    | 1.357  | 4.33E-53 |
| CHCHD3    | ENSG0000 | 24.45   | 10.515  | 1.144  | 7.26E-34 |
| CHCHD6    | ENSG0000 | 8.61    | 3.59    | 1.066  | 5.59E-48 |
| CHEK1     | ENSG0000 | 2.38    | 0.48    | 1.191  | 1.77E-38 |
| CHMP2A    | ENSG0000 | 166.352 | 74.886  | 1.141  | 3.08E-69 |

|          |          |         |         |        |           |
|----------|----------|---------|---------|--------|-----------|
| CHMP4B   | ENSG0000 | 57.181  | 27.285  | 1.041  | 1.47E-42  |
| CHRD     | ENSG0000 | 9.55    | 72.098  | -2.793 | 1.16E-30  |
| CHRNA4   | ENSG0000 | 0.33    | 12.095  | -3.3   | 9.74E-29  |
| CHST4    | ENSG0000 | 0.03    | 1.585   | -1.327 | 1.28E-18  |
| CIDEB    | ENSG0000 | 62.721  | 137.997 | -1.125 | 1.22E-23  |
| CITED2   | ENSG0000 | 16.549  | 36.75   | -1.105 | 3.51E-15  |
| CKAP2    | ENSG0000 | 3.09    | 0.855   | 1.141  | 2.09E-33  |
| CKAP4    | ENSG0000 | 32.45   | 11.11   | 1.466  | 9.61E-39  |
| CKB      | ENSG0000 | 26.379  | 10.115  | 1.301  | 4.73E-13  |
| CKLF     | ENSG0000 | 29.829  | 9.115   | 1.608  | 2.26E-62  |
| CKS1B    | ENSG0000 | 71.878  | 24.695  | 1.504  | 3.76E-61  |
| CKS1BP3  | ENSG0000 | 5.44    | 0.475   | 2.126  | 1.92E-51  |
| CKS2     | ENSG0000 | 31.349  | 8.62    | 1.75   | 3.56E-45  |
| CLASRP   | ENSG0000 | 20.34   | 45.469  | -1.123 | 2.99E-03  |
| CLDN10   | ENSG0000 | 0.1     | 1.76    | -1.327 | 6.13E-06  |
| CLDN15   | ENSG0000 | 24.411  | 8.805   | 1.374  | 1.73E-16  |
| CLDN2    | ENSG0000 | 5.48    | 16.855  | -1.462 | 1.92E-05  |
| CLDN7    | ENSG0000 | 35.24   | 14.474  | 1.228  | 2.16E-08  |
| CLEC14A  | ENSG0000 | 7.72    | 3.055   | 1.105  | 1.10E-24  |
| CLEC1B   | ENSG0000 | 0.03    | 8.658   | -3.229 | 1.07E-97  |
| CLEC4G   | ENSG0000 | 0.12    | 23.634  | -4.459 | 5.34E-114 |
| CLEC4M   | ENSG0000 | 0.02    | 18.949  | -4.29  | 1.36E-146 |
| CLGN     | ENSG0000 | 2.2     | 0.6     | 1      | 5.64E-11  |
| CLIC1    | ENSG0000 | 143.867 | 43.331  | 1.708  | 1.91E-47  |
| CLN6     | ENSG0000 | 19.69   | 9.18    | 1.023  | 2.95E-51  |
| CLRN3    | ENSG0000 | 4       | 14.575  | -1.639 | 1.60E-12  |
| CLTA     | ENSG0000 | 122.402 | 57.029  | 1.089  | 1.99E-50  |
| CMSS1    | ENSG0000 | 13.65   | 5.695   | 1.13   | 5.50E-47  |
| CMTM7    | ENSG0000 | 8.1     | 3.55    | 1      | 1.06E-15  |
| CNDP1    | ENSG0000 | 0.49    | 17.989  | -3.672 | 1.82E-56  |
| CNIH4    | ENSG0000 | 32.81   | 10.014  | 1.618  | 1.20E-64  |
| CNPY2    | ENSG0000 | 165.673 | 75.695  | 1.12   | 4.93E-71  |
| CNTFR    | ENSG0000 | 0.49    | 3.555   | -1.612 | 1.21E-06  |
| CNTN3    | ENSG0000 | 0.08    | 2.035   | -1.491 | 2.99E-40  |
| COA3     | ENSG0000 | 130.119 | 62.989  | 1.035  | 3.77E-45  |
| COA6     | ENSG0000 | 53.471  | 13.715  | 1.888  | 2.18E-88  |
| COCH     | ENSG0000 | 1.42    | 0.18    | 1.036  | 1.03E-21  |
| COL15A1  | ENSG0000 | 3.03    | 0.17    | 1.784  | 4.85E-52  |
| COL1A1   | ENSG0000 | 28.3    | 10.504  | 1.349  | 2.14E-09  |
| COL1A2   | ENSG0000 | 29.91   | 12.124  | 1.236  | 1.68E-09  |
| COL27A1  | ENSG0000 | 6.03    | 16.685  | -1.331 | 4.27E-10  |
| COL4A1   | ENSG0000 | 26.299  | 4.465   | 2.321  | 3.62E-43  |
| COL4A2   | ENSG0000 | 30.359  | 7.015   | 1.968  | 1.19E-37  |
| COLEC10  | ENSG0000 | 0.39    | 12.865  | -3.318 | 1.21E-96  |
| COLEC11  | ENSG0000 | 18.71   | 53.509  | -1.468 | 2.49E-20  |
| COMMD4   | ENSG0000 | 110.17  | 35.546  | 1.605  | 1.73E-97  |
| COMMD5   | ENSG0000 | 24.38   | 9.165   | 1.32   | 5.36E-65  |
| COPA     | ENSG0000 | 47.009  | 19.744  | 1.211  | 6.92E-30  |
| COPG2    | ENSG0000 | 6       | 2.18    | 1.138  | 8.90E-34  |
| COPS6    | ENSG0000 | 83.707  | 38.084  | 1.116  | 9.69E-69  |
| COPZ1    | ENSG0000 | 81.882  | 40.161  | 1.01   | 1.86E-49  |
| CORO1B   | ENSG0000 | 47.55   | 23.209  | 1.004  | 1.49E-42  |
| COX20    | ENSG0000 | 40.969  | 18.425  | 1.111  | 2.80E-44  |
| COX4I2   | ENSG0000 | 3.1     | 0.33    | 1.624  | 4.93E-71  |
| COX6A1   | ENSG0000 | 639.1   | 304.795 | 1.066  | 4.56E-61  |
| COX6A2   | ENSG0000 | 2.46    | 6.19    | -1.055 | 4.48E-09  |
| COX6B1   | ENSG0000 | 407.285 | 148.543 | 1.449  | 4.41E-65  |
| COX6B1P4 | ENSG0000 | 0       | 1.055   | -1.039 | 8.51E-76  |



|           |          |         |          |        |          |
|-----------|----------|---------|----------|--------|----------|
| COX6C     | ENSG0000 | 582.17  | 237.502  | 1.29   | 3.06E-60 |
| COX7A2    | ENSG0000 | 317.364 | 149.805  | 1.078  | 3.75E-45 |
| COX7B     | ENSG0000 | 168.51  | 73.211   | 1.192  | 4.09E-56 |
| COX7C     | ENSG0000 | 750.183 | 309.093  | 1.276  | 2.01E-63 |
| COX7CP1   | ENSG0000 | 0       | 1.532    | -1.34  | 6.12E-13 |
| COX8A     | ENSG0000 | 396.56  | 187.065  | 1.08   | 2.35E-54 |
| CPD       | ENSG0000 | 16.511  | 6.295    | 1.263  | 8.17E-23 |
| CPE       | ENSG0000 | 15.74   | 4.685    | 1.558  | 2.12E-24 |
| CPEB3     | ENSG0000 | 1.11    | 3.71     | -1.158 | 7.09E-40 |
| CPED1     | ENSG0000 | 3.01    | 7.33     | -1.055 | 2.93E-23 |
| CPQ       | ENSG0000 | 47.94   | 14.525   | 1.656  | 4.21E-58 |
| CPSF3     | ENSG0000 | 13.29   | 5.94     | 1.042  | 1.43E-58 |
| CPT1B     | ENSG0000 | 5.21    | 13.954   | -1.268 | 5.88E-07 |
| CPVL      | ENSG0000 | 14.5    | 2.755    | 2.045  | 3.69E-20 |
| CRHBP     | ENSG0000 | 0.56    | 16.829   | -3.515 | 3.43E-75 |
| CRIP1     | ENSG0000 | 26.359  | 7.01     | 1.772  | 1.06E-23 |
| CRNDE     | ENSG0000 | 4.62    | 0.5      | 1.906  | 2.52E-27 |
| CRNKL1    | ENSG0000 | 13.85   | 5.9      | 1.106  | 4.78E-63 |
| CROCCP2   | ENSG0000 | 2.91    | 7.045    | -1.041 | 5.78E-21 |
| CRP       | ENSG0000 | 251.671 | 2792.323 | -3.467 | 1.62E-13 |
| CRTAP     | ENSG0000 | 47.31   | 22.299   | 1.052  | 1.27E-22 |
| CSAD      | ENSG0000 | 14.78   | 44.387   | -1.524 | 5.27E-29 |
| CSE1L     | ENSG0000 | 21.24   | 8.83     | 1.178  | 3.31E-55 |
| CSF3R     | ENSG0000 | 1.43    | 6.905    | -1.702 | 3.81E-27 |
| CSNK2B    | ENSG0000 | 182.771 | 79.873   | 1.184  | 4.67E-67 |
| CSRNP1    | ENSG0000 | 7.19    | 23.779   | -1.597 | 3.50E-31 |
| CSTB      | ENSG0000 | 62.012  | 30.3     | 1.009  | 3.64E-26 |
| CSTF2     | ENSG0000 | 4.47    | 1.56     | 1.095  | 1.37E-34 |
| CTB-25B1  | ENSG0000 | 9.2     | 3.654    | 1.132  | 2.22E-49 |
| CTB-50L1  | ENSG0000 | 1.12    | 5.205    | -1.549 | 6.55E-24 |
| CTB-63M2  | ENSG0000 | 136.882 | 29.105   | 2.195  | 1.57E-20 |
| CTB-79E8  | ENSG0000 | 0       | 2.14     | -1.651 | 3.13E-21 |
| CTB-89H1  | ENSG0000 | 1.4     | 3.94     | -1.041 | 5.23E-13 |
| CTC-246B  | ENSG0000 | 5.76    | 1.865    | 1.238  | 2.29E-25 |
| CTC-505O  | ENSG0000 | 2.9     | 11.22    | -1.648 | 1.94E-11 |
| CTC-524C  | ENSG0000 | 0.71    | 3.425    | -1.372 | 4.47E-21 |
| CTC-529I1 | ENSG0000 | 0.66    | 3.14     | -1.318 | 2.44E-37 |
| CTD-2240  | ENSG0000 | 0.3     | 2.59     | -1.465 | 3.83E-54 |
| CTD-2537  | ENSG0000 | 1.46    | 8.73     | -1.984 | 1.04E-19 |
| CTD-2540  | ENSG0000 | 125.4   | 57.014   | 1.124  | 2.20E-18 |
| CTD-2619  | ENSG0000 | 1.41    | 6.11     | -1.561 | 1.97E-20 |
| CTD-2619  | ENSG0000 | 1.39    | 8.145    | -1.936 | 1.05E-25 |
| CTD-2619  | ENSG0000 | 1.95    | 6.439    | -1.334 | 7.86E-19 |
| CTD-3080  | ENSG0000 | 0.44    | 3.79     | -1.734 | 1.40E-29 |
| CTD-3092  | ENSG0000 | 2.47    | 9.255    | -1.563 | 2.53E-27 |
| CTHRC1    | ENSG0000 | 2.35    | 0.245    | 1.428  | 3.20E-24 |
| CTNNA1    | ENSG0000 | 88.812  | 42.721   | 1.039  | 1.10E-43 |
| CTNNBL1   | ENSG0000 | 45.379  | 20.99    | 1.077  | 2.39E-33 |
| CTSA      | ENSG0000 | 181.974 | 53.563   | 1.746  | 1.71E-70 |
| CTSC      | ENSG0000 | 35.961  | 14.13    | 1.289  | 1.43E-20 |
| CTSD      | ENSG0000 | 769.138 | 382.084  | 1.007  | 1.02E-31 |
| CTSH      | ENSG0000 | 163.46  | 77.63    | 1.065  | 5.46E-19 |
| CTSS      | ENSG0000 | 37.281  | 13.98    | 1.354  | 5.87E-11 |
| CUEDC1    | ENSG0000 | 7.88    | 3.19     | 1.084  | 6.86E-26 |
| CUTA      | ENSG0000 | 288.894 | 108.548  | 1.404  | 1.34E-74 |
| CXCL10    | ENSG0000 | 11.72   | 1.145    | 2.568  | 3.36E-23 |
| CXCL12    | ENSG0000 | 11.66   | 60.325   | -2.276 | 7.53E-40 |
| CXCL14    | ENSG0000 | 0.19    | 14.215   | -3.676 | 7.94E-78 |

|          |          |         |          |        |          |
|----------|----------|---------|----------|--------|----------|
| CXCL2    | ENSG0000 | 18.181  | 119.784  | -2.655 | 1.51E-45 |
| CXCL9    | ENSG0000 | 4.18    | 0.765    | 1.553  | 5.77E-14 |
| CXorf36  | ENSG0000 | 2.25    | 0.32     | 1.3    | 1.83E-66 |
| CYB5R1   | ENSG0000 | 47.698  | 20.285   | 1.194  | 2.90E-52 |
| CYC1     | ENSG0000 | 157.324 | 75.334   | 1.052  | 5.84E-48 |
| CYP1A1   | ENSG0000 | 0.97    | 4.71     | -1.535 | 1.72E-04 |
| CYP1A2   | ENSG0000 | 0.48    | 44.13    | -4.93  | 3.50E-37 |
| CYP21A1P | ENSG0000 | 2.25    | 6.15     | -1.137 | 7.39E-04 |
| CYP21A2  | ENSG0000 | 5.8     | 14.85    | -1.221 | 6.93E-07 |
| CYP26A1  | ENSG0000 | 0.28    | 4.96     | -2.219 | 5.10E-42 |
| CYP2A6   | ENSG0000 | 132.862 | 592.285  | -2.148 | 3.83E-11 |
| CYP2A7   | ENSG0000 | 1.97    | 29.83    | -3.376 | 7.48E-14 |
| CYP2B6   | ENSG0000 | 15.26   | 76.219   | -2.248 | 3.21E-25 |
| CYP2B7P  | ENSG0000 | 5.24    | 14.939   | -1.353 | 1.85E-03 |
| CYP2C19  | ENSG0000 | 0.33    | 6.81     | -2.554 | 3.42E-45 |
| CYP2C8   | ENSG0000 | 85.017  | 509.168  | -2.568 | 5.79E-27 |
| CYP2C9   | ENSG0000 | 134.596 | 470.368  | -1.798 | 1.33E-17 |
| CYP2D7   | ENSG0000 | 19.04   | 65.65    | -1.734 | 1.53E-12 |
| CYP2E1   | ENSG0000 | 500.525 | 2526.544 | -2.333 | 3.98E-21 |
| CYP39A1  | ENSG0000 | 3.25    | 17.415   | -2.115 | 3.87E-28 |
| CYP3A4   | ENSG0000 | 31.139  | 386.278  | -3.591 | 1.22E-16 |
| CYP3A43  | ENSG0000 | 0.75    | 2.875    | -1.147 | 1.02E-13 |
| CYP3A5   | ENSG0000 | 100.148 | 212.607  | -1.078 | 1.23E-05 |
| CYP4A11  | ENSG0000 | 108.217 | 299.559  | -1.46  | 1.21E-15 |
| CYP4A22  | ENSG0000 | 23.29   | 77.329   | -1.689 | 1.47E-19 |
| CYP7A1   | ENSG0000 | 10.65   | 1.939    | 1.987  | 7.80E-10 |
| CYP8B1   | ENSG0000 | 34.489  | 127.326  | -1.854 | 2.61E-21 |
| CYR61    | ENSG0000 | 14.11   | 53.815   | -1.859 | 8.70E-30 |
| CYSTM1   | ENSG0000 | 72.781  | 21.57    | 1.709  | 6.22E-58 |
| CYTH2    | ENSG0000 | 23.18   | 9.76     | 1.168  | 2.22E-48 |
| DAD1     | ENSG0000 | 207.245 | 96.907   | 1.089  | 1.94E-61 |
| DAP3     | ENSG0000 | 95.378  | 39.351   | 1.256  | 2.69E-68 |
| DAPK2    | ENSG0000 | 4.37    | 1.105    | 1.351  | 2.77E-40 |
| DARS2    | ENSG0000 | 10.48   | 3.105    | 1.484  | 3.52E-50 |
| DAXX     | ENSG0000 | 23.62   | 10.495   | 1.099  | 5.71E-40 |
| DBH      | ENSG0000 | 0.56    | 10.785   | -2.917 | 5.04E-99 |
| DBH-AS1  | ENSG0000 | 5.1     | 20.855   | -1.841 | 1.48E-21 |
| DBN1     | ENSG0000 | 4.76    | 1.49     | 1.21   | 5.55E-22 |
| DBNDD1   | ENSG0000 | 11.41   | 2.12     | 1.992  | 7.68E-36 |
| DBNDD2   | ENSG0000 | 8.35    | 3.465    | 1.066  | 1.79E-24 |
| DBP      | ENSG0000 | 18.81   | 6.13     | 1.474  | 2.74E-34 |
| DCAF13   | ENSG0000 | 17.179  | 6.265    | 1.323  | 4.36E-45 |
| DCDC2    | ENSG0000 | 2.38    | 0.62     | 1.061  | 3.39E-11 |
| DCK      | ENSG0000 | 3.95    | 1.415    | 1.035  | 8.38E-27 |
| DCN      | ENSG0000 | 14.87   | 101.289  | -2.688 | 1.21E-29 |
| DCTN2    | ENSG0000 | 55.341  | 26.62    | 1.028  | 6.03E-34 |
| DCTPP1   | ENSG0000 | 22.201  | 9.24     | 1.18   | 5.91E-53 |
| DDAH2    | ENSG0000 | 45.041  | 19.78    | 1.148  | 3.31E-31 |
| DDOST    | ENSG0000 | 104.22  | 48.816   | 1.079  | 1.42E-35 |
| DDX3Y    | ENSG0000 | 3.68    | 8.605    | -1.037 | 3.27E-10 |
| DDX41    | ENSG0000 | 59.511  | 26.05    | 1.162  | 1.64E-69 |
| DEFA1    | ENSG0000 | 0.09    | 2.755    | -1.784 | 7.86E-44 |
| DEFA1B   | ENSG0000 | 0       | 2.35     | -1.744 | 8.92E-47 |
| DEFA3    | ENSG0000 | 0       | 1.345    | -1.23  | 2.14E-31 |
| DEPTOR   | ENSG0000 | 9.3     | 3.985    | 1.047  | 4.12E-28 |
| DERL1    | ENSG0000 | 56.191  | 26.628   | 1.05   | 5.19E-37 |
| DES      | ENSG0000 | 0.19    | 2.725    | -1.646 | 3.52E-34 |
| DHFRP1   | ENSG0000 | 2.31    | 0.635    | 1.018  | 4.52E-10 |

|          |          |         |         |        |          |
|----------|----------|---------|---------|--------|----------|
| DHODH    | ENSG0000 | 14.04   | 49.561  | -1.749 | 3.99E-44 |
| DHRS7    | ENSG0000 | 80.309  | 37.9    | 1.064  | 5.29E-22 |
| DHX9     | ENSG0000 | 41.55   | 19.855  | 1.029  | 8.48E-40 |
| DIO3OS   | ENSG0000 | 0.41    | 4.344   | -1.922 | 2.75E-26 |
| DIRAS3   | ENSG0000 | 0.25    | 2.305   | -1.403 | 1.29E-38 |
| DLGAP1-A | ENSG0000 | 7.94    | 2.765   | 1.248  | 3.17E-30 |
| DLGAP5   | ENSG0000 | 1.41    | 0.07    | 1.171  | 3.76E-38 |
| DLL4     | ENSG0000 | 3.79    | 1.165   | 1.146  | 6.49E-35 |
| DNAJB11  | ENSG0000 | 145.411 | 63.964  | 1.172  | 4.51E-58 |
| DNAJC12  | ENSG0000 | 6.66    | 21.085  | -1.528 | 1.18E-18 |
| DNAJC19P | ENSG0000 | 2.02    | 0.425   | 1.084  | 5.55E-20 |
| DNASE1L3 | ENSG0000 | 6.64    | 39.306  | -2.399 | 3.21E-36 |
| DNASE2   | ENSG0000 | 32.07   | 13.445  | 1.195  | 5.48E-27 |
| DNHD1    | ENSG0000 | 1.45    | 6.529   | -1.62  | 1.38E-17 |
| DNPH1    | ENSG0000 | 125.6   | 57.579  | 1.112  | 3.92E-46 |
| DOCK5    | ENSG0000 | 2.04    | 5.98    | -1.199 | 5.82E-19 |
| DOLK     | ENSG0000 | 10.08   | 4.42    | 1.032  | 8.50E-57 |
| DPCD     | ENSG0000 | 7.67    | 3.15    | 1.063  | 3.19E-37 |
| DPH1     | ENSG0000 | 10.36   | 22.265  | -1.034 | 1.87E-17 |
| DPM3     | ENSG0000 | 133.61  | 60.894  | 1.121  | 1.08E-40 |
| DPP3     | ENSG0000 | 21.58   | 10.23   | 1.008  | 6.32E-37 |
| DPP4     | ENSG0000 | 19.36   | 5.345   | 1.682  | 3.61E-16 |
| DPT      | ENSG0000 | 0.55    | 6.09    | -2.194 | 5.77E-25 |
| DPY30    | ENSG0000 | 58.651  | 25.86   | 1.151  | 3.29E-71 |
| DRAP1    | ENSG0000 | 101.391 | 38.361  | 1.379  | 4.29E-83 |
| DRG1     | ENSG0000 | 40.159  | 18.46   | 1.081  | 7.30E-57 |
| DSN1     | ENSG0000 | 7.32    | 2.66    | 1.185  | 1.72E-48 |
| DTD1     | ENSG0000 | 10.72   | 4.72    | 1.035  | 4.28E-20 |
| DTL      | ENSG0000 | 2.23    | 0.145   | 1.496  | 1.04E-41 |
| DTNA     | ENSG0000 | 6.14    | 0.99    | 1.843  | 4.13E-27 |
| DTNBP1   | ENSG0000 | 8.48    | 3.67    | 1.021  | 1.58E-32 |
| DTX1     | ENSG0000 | 4.03    | 11.335  | -1.294 | 1.17E-21 |
| DTX4     | ENSG0000 | 3.77    | 8.57    | -1.005 | 1.15E-10 |
| DTYMK    | ENSG0000 | 19.68   | 7.14    | 1.345  | 3.89E-55 |
| DUSP1    | ENSG0000 | 76.452  | 213.619 | -1.47  | 6.33E-21 |
| DUSP23   | ENSG0000 | 131.497 | 63.76   | 1.033  | 3.93E-33 |
| DUSP9    | ENSG0000 | 2.14    | 0.27    | 1.306  | 1.47E-24 |
| DUXAP8   | ENSG0000 | 1.89    | 0.225   | 1.238  | 1.59E-27 |
| DYNC1H1  | ENSG0000 | 65.922  | 29.81   | 1.119  | 3.19E-53 |
| DYNLL1   | ENSG0000 | 246.304 | 98.267  | 1.317  | 1.33E-55 |
| DYNLRB1  | ENSG0000 | 145.139 | 51.949  | 1.465  | 1.38E-80 |
| E2F1     | ENSG0000 | 5.49    | 0.28    | 2.342  | 2.90E-57 |
| EBF4     | ENSG0000 | 2.55    | 6.54    | -1.087 | 8.38E-07 |
| ECHDC2   | ENSG0000 | 148.549 | 458.109 | -1.618 | 1.73E-42 |
| ECM1     | ENSG0000 | 2.51    | 17.755  | -2.418 | 1.30E-63 |
| ECT2     | ENSG0000 | 3       | 0.61    | 1.313  | 4.23E-34 |
| EEF1A1P5 | ENSG0000 | 63.341  | 26.253  | 1.239  | 2.14E-14 |
| EEF1A1P6 | ENSG0000 | 11.7    | 3.45    | 1.513  | 1.01E-30 |
| EEF1A2   | ENSG0000 | 7.09    | 0.45    | 2.48   | 9.75E-14 |
| EEF1D    | ENSG0000 | 621.107 | 280.43  | 1.144  | 2.20E-43 |
| EEF1G    | ENSG0000 | 721.421 | 356.435 | 1.015  | 1.20E-44 |
| EFCAB11  | ENSG0000 | 4.05    | 1.51    | 1.009  | 6.94E-49 |
| EFHD1    | ENSG0000 | 5.26    | 17.155  | -1.536 | 2.61E-09 |
| EFNA4    | ENSG0000 | 8.27    | 2.885   | 1.255  | 2.00E-46 |
| EFTUD2   | ENSG0000 | 32.139  | 14.38   | 1.107  | 2.23E-57 |
| EGR1     | ENSG0000 | 18.64   | 44.085  | -1.199 | 1.97E-11 |
| EHD4     | ENSG0000 | 9.79    | 3.77    | 1.178  | 6.04E-22 |
| EHMT2    | ENSG0000 | 23.36   | 8.135   | 1.415  | 1.27E-58 |

|          |          |          |         |        |          |
|----------|----------|----------|---------|--------|----------|
| EIF2D    | ENSG0000 | 30.789   | 13.13   | 1.17   | 1.04E-57 |
| EIF3CL   | ENSG0000 | 33.16    | 14.54   | 1.136  | 9.35E-38 |
| EIF3D    | ENSG0000 | 84.829   | 35.248  | 1.244  | 9.48E-55 |
| EIF3E    | ENSG0000 | 194.253  | 69.545  | 1.469  | 1.00E-45 |
| EIF3H    | ENSG0000 | 142.754  | 54.924  | 1.362  | 7.81E-48 |
| EIF3K    | ENSG0000 | 205.429  | 85.005  | 1.263  | 5.18E-70 |
| EIF3M    | ENSG0000 | 133.963  | 61.922  | 1.101  | 2.64E-48 |
| EIF4BP7  | ENSG0000 | 1.68     | 0.34    | 1      | 3.21E-40 |
| EIF5AP4  | ENSG0000 | 3.95     | 0.16    | 2.093  | 9.78E-37 |
| EIF6     | ENSG0000 | 180.305  | 77.275  | 1.212  | 5.07E-65 |
| ELOVL1   | ENSG0000 | 37.6     | 17.105  | 1.092  | 1.59E-39 |
| ELOVL2   | ENSG0000 | 17.6     | 4.335   | 1.802  | 7.73E-15 |
| EMC2     | ENSG0000 | 31.99    | 14.01   | 1.136  | 6.04E-41 |
| EMC3     | ENSG0000 | 74.279   | 28.66   | 1.344  | 1.83E-55 |
| EMC4     | ENSG0000 | 77.299   | 36.715  | 1.054  | 5.22E-67 |
| EMCN     | ENSG0000 | 3.89     | 1.22    | 1.139  | 2.32E-25 |
| EMP1     | ENSG0000 | 7.72     | 3.295   | 1.022  | 2.12E-06 |
| ENAH     | ENSG0000 | 10.65    | 2.805   | 1.614  | 2.54E-29 |
| ENGASE   | ENSG0000 | 5.9      | 13.544  | -1.076 | 1.47E-04 |
| ENO3     | ENSG0000 | 11.36    | 58.1    | -2.258 | 4.36E-29 |
| ENPP2    | ENSG0000 | 14.99    | 3.555   | 1.812  | 3.56E-22 |
| ENSA     | ENSG0000 | 109.949  | 44.47   | 1.287  | 1.18E-60 |
| FUCA2    | ENSG0000 | 34.951   | 16.73   | 1.02   | 1.28E-29 |
| SEMA3F   | ENSG0000 | 5.44     | 1.655   | 1.278  | 1.43E-50 |
| LASP1    | ENSG0000 | 64.408   | 28.585  | 1.145  | 4.22E-38 |
| SLC7A2   | ENSG0000 | 14.44    | 46.174  | -1.611 | 3.88E-24 |
| PLXND1   | ENSG0000 | 36.579   | 15.975  | 1.147  | 2.23E-29 |
| LAMP2    | ENSG0000 | 125.756  | 60.959  | 1.033  | 4.88E-20 |
| TMEM98   | ENSG0000 | 30.38    | 7.44    | 1.895  | 2.53E-21 |
| TMEM132  | ENSG0000 | 2.42     | 0.575   | 1.119  | 1.31E-17 |
| TNFRSF12 | ENSG0000 | 46.019   | 15.247  | 1.533  | 8.77E-15 |
| GGCT     | ENSG0000 | 31.26    | 13.475  | 1.156  | 8.64E-56 |
| GTF2IRD1 | ENSG0000 | 7.07     | 2.745   | 1.108  | 1.25E-33 |
| IL32     | ENSG0000 | 748.417  | 295.25  | 1.339  | 1.34E-21 |
| RPS20    | ENSG0000 | 1550.372 | 610.077 | 1.344  | 9.99E-54 |
| TENM1    | ENSG0000 | 0.12     | 1.3     | -1.038 | 5.58E-26 |
| MLXIPL   | ENSG0000 | 98.7     | 263.982 | -1.41  | 2.76E-10 |
| METTL13  | ENSG0000 | 18       | 7.735   | 1.121  | 6.04E-57 |
| SEMA3G   | ENSG0000 | 1.93     | 0.435   | 1.03   | 6.60E-27 |
| SLC6A13  | ENSG0000 | 2.29     | 11.89   | -1.97  | 1.19E-28 |
| NME2     | ENSG0000 | 15.899   | 5.455   | 1.389  | 5.15E-22 |
| SYT7     | ENSG0000 | 6.73     | 21.18   | -1.521 | 2.42E-13 |
| PSMC4    | ENSG0000 | 71.401   | 32.394  | 1.116  | 7.36E-60 |
| SLC25A39 | ENSG0000 | 125.382  | 59.779  | 1.056  | 2.03E-60 |
| TACC3    | ENSG0000 | 10.26    | 3.13    | 1.447  | 2.48E-40 |
| POLA2    | ENSG0000 | 7.17     | 2.465   | 1.238  | 1.69E-50 |
| NPC1L1   | ENSG0000 | 4.68     | 13.435  | -1.346 | 1.66E-15 |
| IGF1     | ENSG0000 | 4.77     | 12.475  | -1.224 | 9.57E-14 |
| RUFY3    | ENSG0000 | 6.88     | 14.95   | -1.017 | 7.58E-15 |
| SLC11A1  | ENSG0000 | 0.59     | 2.335   | -1.069 | 5.08E-20 |
| MARCO    | ENSG0000 | 0.39     | 19.3    | -3.868 | 4.03E-61 |
| HGF      | ENSG0000 | 0.79     | 6.615   | -2.089 | 6.68E-35 |
| SERPINB1 | ENSG0000 | 26.379   | 10.953  | 1.196  | 4.83E-24 |
| RRAGD    | ENSG0000 | 8.76     | 3.255   | 1.198  | 1.36E-28 |
| NCAPH2   | ENSG0000 | 23.71    | 10.6    | 1.091  | 1.53E-48 |
| VIM      | ENSG0000 | 130.273  | 52.559  | 1.293  | 1.76E-19 |
| RNASET2  | ENSG0000 | 42.86    | 17.46   | 1.248  | 9.02E-33 |
| GRN      | ENSG0000 | 187.857  | 59.719  | 1.637  | 6.44E-71 |

|         |          |          |         |        |          |
|---------|----------|----------|---------|--------|----------|
| TMSB10  | ENSG0000 | 859.646  | 208.556 | 2.038  | 1.53E-37 |
| MYOM2   | ENSG0000 | 0.86     | 4.635   | -1.599 | 2.62E-37 |
| RPL26L1 | ENSG0000 | 43.989   | 19.929  | 1.104  | 1.27E-65 |
| FAM65C  | ENSG0000 | 0.33     | 7.74    | -2.716 | 8.69E-74 |
| ZIC2    | ENSG0000 | 1.42     | 0.01    | 1.261  | 2.17E-31 |
| TPR     | ENSG0000 | 20       | 9.455   | 1.006  | 7.29E-31 |
| NEDD4L  | ENSG0000 | 25.941   | 11.405  | 1.119  | 1.58E-29 |
| HEXB    | ENSG0000 | 156.096  | 62.003  | 1.318  | 5.25E-66 |
| HOMER3  | ENSG0000 | 7.3      | 2.49    | 1.25   | 2.80E-23 |
| RAD51   | ENSG0000 | 1.75     | 0.235   | 1.155  | 6.48E-39 |
| THOC3   | ENSG0000 | 22.43    | 9.25    | 1.193  | 6.88E-48 |
| PRSS8   | ENSG0000 | 3        | 10.11   | -1.474 | 3.16E-09 |
| LAMA3   | ENSG0000 | 3.81     | 0.88    | 1.355  | 1.87E-22 |
| PHPT1   | ENSG0000 | 99.787   | 48.509  | 1.026  | 2.25E-41 |
| TARBP1  | ENSG0000 | 14.1     | 5.62    | 1.19   | 5.14E-36 |
| SPAG4   | ENSG0000 | 6.14     | 2.21    | 1.154  | 1.70E-20 |
| POLD1   | ENSG0000 | 13.28    | 4.905   | 1.274  | 6.07E-49 |
| SPA17   | ENSG0000 | 2.84     | 0.75    | 1.134  | 2.96E-32 |
| NGFR    | ENSG0000 | 1.25     | 7.695   | -1.95  | 2.04E-36 |
| RFXANK  | ENSG0000 | 44.099   | 17.625  | 1.276  | 1.95E-58 |
| OAT     | ENSG0000 | 9.78     | 26.915  | -1.373 | 7.28E-09 |
| ZNRD1   | ENSG0000 | 25.93    | 10.03   | 1.288  | 1.05E-59 |
| PKM     | ENSG0000 | 38.791   | 13.675  | 1.439  | 7.36E-21 |
| RRP15   | ENSG0000 | 4.32     | 1.655   | 1.003  | 5.88E-26 |
| RHOA    | ENSG0000 | 154.396  | 75.585  | 1.021  | 1.12E-41 |
| IFI35   | ENSG0000 | 35.901   | 15.2    | 1.188  | 3.78E-32 |
| GPKOW   | ENSG0000 | 14.82    | 6.73    | 1.033  | 2.64E-56 |
| PRR11   | ENSG0000 | 1.37     | 0.14    | 1.056  | 2.78E-35 |
| UFD1L   | ENSG0000 | 57.039   | 23.485  | 1.245  | 3.98E-58 |
| PABPC1  | ENSG0000 | 653.57   | 181.313 | 1.844  | 9.41E-59 |
| RPL31   | ENSG0000 | 1529.028 | 743.015 | 1.04   | 2.85E-40 |
| LMCD1   | ENSG0000 | 10.45    | 3.68    | 1.291  | 2.04E-21 |
| WBSCR22 | ENSG0000 | 56.441   | 25.895  | 1.095  | 4.57E-64 |
| TRIP13  | ENSG0000 | 1.55     | 0.21    | 1.075  | 3.15E-33 |
| FAM50A  | ENSG0000 | 61.922   | 25.359  | 1.255  | 1.46E-43 |
| HMMR    | ENSG0000 | 2.54     | 0.2     | 1.561  | 4.19E-43 |
| P4HA2   | ENSG0000 | 15.899   | 5.81    | 1.311  | 1.88E-35 |
| FCGR2B  | ENSG0000 | 1.64     | 9.1     | -1.936 | 7.25E-22 |
| XRCC1   | ENSG0000 | 13.98    | 4.955   | 1.331  | 6.31E-57 |
| MCM2    | ENSG0000 | 6.75     | 0.735   | 2.159  | 1.21E-49 |
| SMARCE1 | ENSG0000 | 49.05    | 20.464  | 1.221  | 1.03E-43 |
| GSDMB   | ENSG0000 | 9.1      | 23.562  | -1.282 | 5.33E-06 |
| IGF2BP2 | ENSG0000 | 2.68     | 0.68    | 1.131  | 2.89E-15 |
| NOTCH3  | ENSG0000 | 4.32     | 0.925   | 1.467  | 5.02E-30 |
| TEAD2   | ENSG0000 | 7.46     | 3.145   | 1.029  | 1.47E-13 |
| HACD3   | ENSG0000 | 47.261   | 19.23   | 1.254  | 2.71E-30 |
| TUBE1   | ENSG0000 | 4.17     | 14.245  | -1.56  | 2.56E-55 |
| NUP37   | ENSG0000 | 10.3     | 3.445   | 1.346  | 1.67E-59 |
| SEC31B  | ENSG0000 | 1.22     | 5.16    | -1.472 | 4.60E-23 |
| KIFAP3  | ENSG0000 | 9.63     | 3.71    | 1.174  | 1.70E-37 |
| MCM6    | ENSG0000 | 7.88     | 1.485   | 1.837  | 2.31E-49 |
| MCAM    | ENSG0000 | 14.76    | 3.97    | 1.665  | 3.84E-36 |
| UBE2T   | ENSG0000 | 8.81     | 0.695   | 2.533  | 9.85E-75 |
| IL4R    | ENSG0000 | 17.09    | 36.155  | -1.038 | 2.59E-17 |
| EXOSC5  | ENSG0000 | 22.461   | 8.788   | 1.261  | 1.15E-60 |
| UBE2A   | ENSG0000 | 25.029   | 11.63   | 1.043  | 4.00E-40 |
| FBLN1   | ENSG0000 | 8.62     | 3.655   | 1.047  | 4.88E-07 |
| MAP2    | ENSG0000 | 3.05     | 0.965   | 1.043  | 8.47E-17 |

|          |          |          |          |        |          |
|----------|----------|----------|----------|--------|----------|
| PMS2P1   | ENSG0000 | 5.08     | 2.01     | 1.014  | 4.84E-48 |
| PAFAH1B3 | ENSG0000 | 14.81    | 3.225    | 1.904  | 2.54E-43 |
| KCNN2    | ENSG0000 | 0.25     | 4.35     | -2.098 | 1.91E-53 |
| NDC80    | ENSG0000 | 2.91     | 0.18     | 1.728  | 3.06E-52 |
| JMJD4    | ENSG0000 | 14.75    | 6.215    | 1.126  | 8.15E-59 |
| HSPB11   | ENSG0000 | 21.91    | 10.425   | 1.004  | 5.79E-49 |
| PLOD1    | ENSG0000 | 76.388   | 36.346   | 1.051  | 2.95E-32 |
| SLC27A5  | ENSG0000 | 248.413  | 497.947  | -1     | 5.86E-10 |
| FAT1     | ENSG0000 | 33.42    | 11.8     | 1.427  | 3.61E-20 |
| HAL      | ENSG0000 | 20.48    | 54.784   | -1.377 | 3.89E-14 |
| GCKR     | ENSG0000 | 22.119   | 98.499   | -2.106 | 1.31E-37 |
| IGSF9    | ENSG0000 | 1.64     | 7.91     | -1.755 | 1.31E-18 |
| TTC39A   | ENSG0000 | 2.76     | 0.555    | 1.274  | 3.15E-21 |
| FTL      | ENSG0000 | 11550.76 | 5723.571 | 1.013  | 5.51E-19 |
| GNAO1    | ENSG0000 | 0.68     | 7.76     | -2.382 | 4.76E-52 |
| PIR      | ENSG0000 | 23.02    | 9.2      | 1.236  | 1.28E-27 |
| TPX2     | ENSG0000 | 6        | 0.765    | 1.988  | 5.60E-45 |
| SMOX     | ENSG0000 | 4.76     | 1.82     | 1.03   | 1.40E-09 |
| FKBP1A   | ENSG0000 | 88.56    | 40.05    | 1.125  | 5.76E-48 |
| TESC     | ENSG0000 | 7.24     | 2.13     | 1.397  | 5.28E-16 |
| RPL6     | ENSG0000 | 779.064  | 371.739  | 1.065  | 3.44E-53 |
| RPLP0    | ENSG0000 | 1398.049 | 655.112  | 1.092  | 1.85E-44 |
| IGBP1    | ENSG0000 | 20.49    | 8.45     | 1.185  | 2.05E-47 |
| FXYD5    | ENSG0000 | 29.699   | 13.652   | 1.067  | 1.43E-14 |
| GRAMD1A  | ENSG0000 | 18.69    | 8.595    | 1.037  | 7.23E-16 |
| LYZ      | ENSG0000 | 81.413   | 9.505    | 2.972  | 1.14E-24 |
| KIF4A    | ENSG0000 | 1.87     | 0.07     | 1.423  | 4.49E-43 |
| ITGA6    | ENSG0000 | 10.25    | 2.74     | 1.589  | 1.72E-41 |
| ESR1     | ENSG0000 | 0.53     | 4.47     | -1.838 | 3.35E-35 |
| TMEM101  | ENSG0000 | 23.46    | 9.185    | 1.264  | 7.51E-62 |
| PSME1    | ENSG0000 | 221.797  | 100.384  | 1.136  | 5.05E-56 |
| HAUS4    | ENSG0000 | 21.44    | 9.115    | 1.15   | 4.55E-25 |
| WDR76    | ENSG0000 | 2.02     | 0.295    | 1.222  | 2.31E-41 |
| TBX15    | ENSG0000 | 2.27     | 7.885    | -1.442 | 1.26E-14 |
| MYL6     | ENSG0000 | 1006.338 | 476.208  | 1.078  | 8.54E-53 |
| UNC13D   | ENSG0000 | 1.63     | 5.01     | -1.192 | 1.65E-13 |
| SUCO     | ENSG0000 | 6.03     | 2.25     | 1.113  | 2.38E-32 |
| MSH2     | ENSG0000 | 5.18     | 1.415    | 1.356  | 2.42E-46 |
| HOOK2    | ENSG0000 | 8.22     | 22.89    | -1.374 | 5.02E-07 |
| TMEM38B  | ENSG0000 | 8.39     | 3.005    | 1.229  | 1.28E-35 |
| SMIM24   | ENSG0000 | 1.55     | 6.257    | -1.509 | 9.69E-03 |
| TREM2    | ENSG0000 | 3.51     | 0.245    | 1.857  | 9.01E-33 |
| TMEM14A  | ENSG0000 | 50.499   | 22.89    | 1.108  | 1.53E-28 |
| HSP90AB1 | ENSG0000 | 400.622  | 139.516  | 1.515  | 4.29E-45 |
| SCD      | ENSG0000 | 205.457  | 85.176   | 1.26   | 1.12E-05 |
| TSPAN15  | ENSG0000 | 5.6      | 2.11     | 1.086  | 1.23E-19 |
| MZF1     | ENSG0000 | 4.09     | 11.175   | -1.258 | 1.24E-10 |
| IGFALS   | ENSG0000 | 2.83     | 40.84    | -3.449 | 2.19E-47 |
| GADD45B  | ENSG0000 | 66.472   | 152.783  | -1.189 | 2.93E-20 |
| SERPIND1 | ENSG0000 | 344.389  | 146.027  | 1.232  | 4.45E-04 |
| MMP11    | ENSG0000 | 5.24     | 0.35     | 2.209  | 9.60E-39 |
| GGT5     | ENSG0000 | 8.17     | 19.87    | -1.186 | 5.36E-16 |
| SNRPD3   | ENSG0000 | 99.401   | 46.269   | 1.087  | 1.58E-47 |
| PES1     | ENSG0000 | 40.87    | 19.35    | 1.041  | 2.02E-45 |
| LRP5L    | ENSG0000 | 2.81     | 7.535    | -1.164 | 3.77E-13 |
| PIK3IP1  | ENSG0000 | 7        | 2.74     | 1.097  | 1.30E-17 |
| NHP2L1   | ENSG0000 | 81.379   | 35.463   | 1.176  | 1.60E-59 |
| KDELR3   | ENSG0000 | 9.84     | 3.98     | 1.122  | 1.90E-13 |

|         |          |         |         |        |          |
|---------|----------|---------|---------|--------|----------|
| TOMM22  | ENSG0000 | 38.84   | 17.85   | 1.08   | 5.91E-53 |
| MCM5    | ENSG0000 | 21.45   | 4.025   | 2.16   | 2.99E-56 |
| PDGFB   | ENSG0000 | 4.05    | 1.06    | 1.294  | 4.44E-36 |
| ZMAT5   | ENSG0000 | 25.2    | 10.63   | 1.172  | 6.35E-63 |
| SYNGR1  | ENSG0000 | 6.5     | 2.715   | 1.014  | 5.92E-08 |
| SAMM50  | ENSG0000 | 30.89   | 14.73   | 1.02   | 2.94E-36 |
| FOXRED2 | ENSG0000 | 6.45    | 2.045   | 1.291  | 1.30E-29 |
| PVALB   | ENSG0000 | 0.11    | 1.22    | -1     | 2.77E-41 |
| KCTD17  | ENSG0000 | 4.51    | 1.625   | 1.07   | 2.73E-18 |
| TIMM9   | ENSG0000 | 33.88   | 14.115  | 1.206  | 4.79E-61 |
| GSTZ1   | ENSG0000 | 29.67   | 81.055  | -1.42  | 1.10E-26 |
| SLC10A1 | ENSG0000 | 33.819  | 69.567  | -1.019 | 2.91E-07 |
| VRK1    | ENSG0000 | 4.99    | 1.65    | 1.177  | 7.51E-52 |
| PSMB5   | ENSG0000 | 103.421 | 47.67   | 1.101  | 6.32E-71 |
| PSMA6   | ENSG0000 | 123.974 | 57.615  | 1.092  | 8.22E-62 |
| PSME2   | ENSG0000 | 253.755 | 120.229 | 1.071  | 5.98E-45 |
| REC8    | ENSG0000 | 2.28    | 7.14    | -1.311 | 1.43E-14 |
| PNN     | ENSG0000 | 14.91   | 32.62   | -1.079 | 5.10E-11 |
| MMP9    | ENSG0000 | 3.01    | 0.8     | 1.156  | 1.18E-15 |
| PYGB    | ENSG0000 | 14.47   | 5.205   | 1.318  | 6.43E-36 |
| GINS1   | ENSG0000 | 1.72    | 0.2     | 1.181  | 2.40E-37 |
| IFT52   | ENSG0000 | 7.39    | 3.06    | 1.047  | 2.12E-37 |
| MYBL2   | ENSG0000 | 4.07    | 0.19    | 2.091  | 3.56E-43 |
| NDRG3   | ENSG0000 | 7.09    | 2.73    | 1.117  | 1.16E-41 |
| PABPC1L | ENSG0000 | 11.35   | 31.315  | -1.388 | 3.95E-02 |
| PFDN4   | ENSG0000 | 21.78   | 8.525   | 1.258  | 3.44E-54 |
| PRPF6   | ENSG0000 | 40.029  | 14.02   | 1.45   | 6.06E-85 |
| SLC17A9 | ENSG0000 | 29.769  | 90.333  | -1.57  | 4.91E-07 |
| HM13    | ENSG0000 | 160.162 | 70.709  | 1.168  | 1.15E-45 |
| MANBAL  | ENSG0000 | 32.901  | 15.21   | 1.064  | 1.33E-61 |
| MAPRE1  | ENSG0000 | 14.98   | 6.11    | 1.168  | 5.40E-28 |
| OXT     | ENSG0000 | 0.13    | 5.293   | -2.477 | 6.22E-25 |
| PXMP4   | ENSG0000 | 10.38   | 3.335   | 1.392  | 3.71E-58 |
| FAM83D  | ENSG0000 | 4.5     | 0.855   | 1.568  | 1.65E-36 |
| PIGU    | ENSG0000 | 16.75   | 4.875   | 1.595  | 1.06E-81 |
| LIPG    | ENSG0000 | 8.01    | 21.904  | -1.346 | 2.07E-20 |
| PSMD10  | ENSG0000 | 20.941  | 8.67    | 1.182  | 5.29E-39 |
| SRPX    | ENSG0000 | 0.84    | 5.53    | -1.827 | 1.85E-35 |
| F9      | ENSG0000 | 42.659  | 138.457 | -1.675 | 2.08E-23 |
| PLP2    | ENSG0000 | 24.319  | 8.734   | 1.379  | 1.90E-17 |
| SMS     | ENSG0000 | 25.701  | 11.905  | 1.049  | 2.98E-37 |
| HTATSF1 | ENSG0000 | 19.28   | 8.46    | 1.1    | 9.73E-37 |
| TIMP1   | ENSG0000 | 274.601 | 132.577 | 1.045  | 2.16E-02 |
| MAGED2  | ENSG0000 | 63.711  | 22.045  | 1.49   | 1.27E-57 |
| RBM3    | ENSG0000 | 79.539  | 36.115  | 1.118  | 1.99E-23 |
| GLA     | ENSG0000 | 19.061  | 7.165   | 1.297  | 6.62E-36 |
| RGCC    | ENSG0000 | 11.91   | 2.12    | 2.049  | 1.35E-36 |
| MAPK3   | ENSG0000 | 24.54   | 9.99    | 1.217  | 2.16E-53 |
| NUTF2   | ENSG0000 | 55.861  | 25.134  | 1.121  | 1.43E-51 |
| HCFC1R1 | ENSG0000 | 44.622  | 21.699  | 1.007  | 2.88E-40 |
| TAF1C   | ENSG0000 | 6.94    | 14.985  | -1.01  | 1.46E-07 |
| TCEB2   | ENSG0000 | 295.517 | 138.164 | 1.091  | 2.37E-51 |
| PYCARD  | ENSG0000 | 16.68   | 4.764   | 1.617  | 1.09E-21 |
| MAZ     | ENSG0000 | 114.332 | 43.406  | 1.377  | 1.78E-68 |
| NOMO1   | ENSG0000 | 31.299  | 13.774  | 1.128  | 4.10E-47 |
| OIP5    | ENSG0000 | 1.88    | 0.17    | 1.3    | 3.71E-42 |
| RIPK2   | ENSG0000 | 6.29    | 2.515   | 1.052  | 6.24E-25 |
| LAPTM4B | ENSG0000 | 34.179  | 7.56    | 2.039  | 7.12E-31 |

|          |          |          |          |        |          |
|----------|----------|----------|----------|--------|----------|
| NIPAL2   | ENSG0000 | 5.82     | 2.35     | 1.026  | 1.57E-22 |
| SQLE     | ENSG0000 | 36.309   | 9.635    | 1.811  | 2.09E-25 |
| SLC39A14 | ENSG0000 | 54.681   | 160.457  | -1.536 | 6.14E-37 |
| MCM4     | ENSG0000 | 11.24    | 2.725    | 1.716  | 1.41E-37 |
| FGL1     | ENSG0000 | 714.652  | 1526.116 | -1.093 | 5.42E-08 |
| MAN2B1   | ENSG0000 | 55.591   | 17.704   | 1.597  | 1.74E-60 |
| RELB     | ENSG0000 | 13.58    | 4.209    | 1.485  | 2.92E-31 |
| RNASEH2  | ENSG0000 | 16.151   | 2.735    | 2.199  | 4.56E-77 |
| OLFM2    | ENSG0000 | 31.021   | 12.169   | 1.282  | 6.92E-10 |
| PDCD5    | ENSG0000 | 85.241   | 41.33    | 1.027  | 2.56E-49 |
| RPS16    | ENSG0000 | 1328.515 | 622.443  | 1.093  | 5.50E-47 |
| FBL      | ENSG0000 | 123.391  | 47.738   | 1.352  | 7.33E-50 |
| TBCB     | ENSG0000 | 58.351   | 26.444   | 1.113  | 4.50E-42 |
| RPS19    | ENSG0000 | 1703.043 | 813.895  | 1.064  | 4.40E-40 |
| PTPRS    | ENSG0000 | 0.58     | 2.84     | -1.281 | 8.57E-09 |
| LIG1     | ENSG0000 | 16.18    | 6.24     | 1.247  | 6.01E-44 |
| PLA2G4C  | ENSG0000 | 16.41    | 5.25     | 1.478  | 3.54E-30 |
| PPP2R1A  | ENSG0000 | 101.412  | 44.099   | 1.183  | 2.18E-57 |
| LILRB5   | ENSG0000 | 1.45     | 4.175    | -1.079 | 5.91E-27 |
| TFPT     | ENSG0000 | 11.74    | 4.665    | 1.169  | 2.46E-54 |
| PIK3R2   | ENSG0000 | 16.35    | 6.97     | 1.122  | 1.80E-33 |
| TMEM147  | ENSG0000 | 69.05    | 28.196   | 1.263  | 1.04E-50 |
| HAMP     | ENSG0000 | 6.75     | 669.968  | -6.436 | 3.63E-66 |
| NAMPT    | ENSG0000 | 38.001   | 86.288   | -1.162 | 1.32E-14 |
| H2AFV    | ENSG0000 | 78.302   | 31.871   | 1.271  | 2.69E-68 |
| TAX1BP1  | ENSG0000 | 42.499   | 18.625   | 1.148  | 4.00E-42 |
| GARS     | ENSG0000 | 59.231   | 24.455   | 1.243  | 2.68E-45 |
| HSPB1    | ENSG0000 | 644.572  | 168.996  | 1.925  | 2.04E-43 |
| PDAP1    | ENSG0000 | 72.978   | 35.554   | 1.017  | 1.75E-36 |
| SNX8     | ENSG0000 | 17.73    | 5.43     | 1.542  | 3.64E-55 |
| NUDT1    | ENSG0000 | 15.59    | 2.595    | 2.206  | 2.77E-77 |
| SERPINE1 | ENSG0000 | 20.831   | 46.29    | -1.115 | 3.42E-05 |
| PLOD3    | ENSG0000 | 60.601   | 23.364   | 1.338  | 1.88E-53 |
| EZH2     | ENSG0000 | 3.65     | 1.275    | 1.031  | 7.56E-30 |
| LHX2     | ENSG0000 | 0.36     | 2.33     | -1.292 | 3.44E-33 |
| NPM3     | ENSG0000 | 17.14    | 5.595    | 1.46   | 2.79E-27 |
| UBE2S    | ENSG0000 | 19.39    | 3.845    | 2.073  | 5.29E-67 |
| RPL28    | ENSG0000 | 1238.089 | 565.741  | 1.129  | 5.32E-43 |
| PBLD     | ENSG0000 | 29.59    | 69.384   | -1.202 | 6.28E-19 |
| KRT23    | ENSG0000 | 2.85     | 0.21     | 1.67   | 2.75E-10 |
| RPL19    | ENSG0000 | 1450.263 | 637.353  | 1.185  | 4.15E-61 |
| RAD51C   | ENSG0000 | 13.68    | 5.425    | 1.192  | 5.70E-52 |
| TRIM16L  | ENSG0000 | 7.1      | 2.925    | 1.045  | 6.52E-17 |
| RASD1    | ENSG0000 | 14.23    | 43.902   | -1.56  | 8.63E-11 |
| ICAM2    | ENSG0000 | 12.49    | 5.214    | 1.118  | 1.55E-25 |
| SYNGR2   | ENSG0000 | 83.169   | 40.321   | 1.026  | 2.46E-38 |
| LGALS3BP | ENSG0000 | 160.385  | 54.264   | 1.546  | 2.76E-08 |
| VAT1     | ENSG0000 | 49.37    | 16.41    | 1.533  | 1.56E-44 |
| TMEM97   | ENSG0000 | 38.62    | 18.5     | 1.023  | 7.48E-16 |
| SULT1E1  | ENSG0000 | 1.41     | 5.65     | -1.464 | 1.08E-08 |
| HGFAC    | ENSG0000 | 11.26    | 117.783  | -3.276 | 5.22E-35 |
| NCAPG    | ENSG0000 | 2.59     | 0.115    | 1.687  | 1.63E-46 |
| HTATIP2  | ENSG0000 | 77.831   | 32.464   | 1.236  | 1.48E-26 |
| FNBP4    | ENSG0000 | 9.22     | 20.065   | -1.043 | 2.32E-05 |
| SNX15    | ENSG0000 | 9.93     | 4.415    | 1.013  | 8.06E-43 |
| HPX      | ENSG0000 | 1194.589 | 2403.131 | -1.008 | 3.35E-11 |
| MDK      | ENSG0000 | 132.339  | 3.805    | 4.794  | 7.57E-81 |
| RPS13    | ENSG0000 | 649.415  | 322.018  | 1.01   | 6.76E-48 |



|          |          |         |         |        |          |
|----------|----------|---------|---------|--------|----------|
| NDUFS8   | ENSG0000 | 131.06  | 64.625  | 1.009  | 9.08E-47 |
| VWF      | ENSG0000 | 14.41   | 1.715   | 2.505  | 7.16E-57 |
| PTGES3   | ENSG0000 | 137.758 | 65.443  | 1.062  | 8.02E-42 |
| TNS2     | ENSG0000 | 24.931  | 67.367  | -1.399 | 2.42E-23 |
| MAGOHB   | ENSG0000 | 17.95   | 7.98    | 1.077  | 7.20E-53 |
| TRPV4    | ENSG0000 | 0.77    | 2.83    | -1.114 | 2.01E-14 |
| FOXM1    | ENSG0000 | 5.72    | 0.91    | 1.815  | 2.70E-41 |
| RAD51AP1 | ENSG0000 | 1.72    | 0.29    | 1.076  | 1.24E-31 |
| MGP      | ENSG0000 | 34.7    | 15.225  | 1.138  | 2.51E-06 |
| SPSB2    | ENSG0000 | 6.75    | 2.24    | 1.258  | 4.55E-54 |
| SLCO1B3  | ENSG0000 | 1.89    | 30.546  | -3.448 | 4.57E-31 |
| GYS2     | ENSG0000 | 7.64    | 28.294  | -1.761 | 1.57E-25 |
| TMEM14C  | ENSG0000 | 101.159 | 43.904  | 1.186  | 2.44E-59 |
| MCM3     | ENSG0000 | 20.53   | 5.435   | 1.742  | 9.00E-46 |
| VNN1     | ENSG0000 | 17.96   | 39.013  | -1.077 | 3.43E-09 |
| GMNN     | ENSG0000 | 31.111  | 6.19    | 2.159  | 2.77E-59 |
| SLC39A7  | ENSG0000 | 107.157 | 45.144  | 1.229  | 2.79E-43 |
| VEGFA    | ENSG0000 | 53.05   | 116.073 | -1.115 | 3.43E-07 |
| SLC29A1  | ENSG0000 | 46.571  | 22.445  | 1.021  | 4.68E-19 |
| LAMA4    | ENSG0000 | 4.83    | 1.38    | 1.293  | 2.58E-36 |
| GHR      | ENSG0000 | 7.3     | 26.178  | -1.711 | 1.09E-29 |
| KIF20A   | ENSG0000 | 2.79    | 0.13    | 1.746  | 9.12E-45 |
| SPARC    | ENSG0000 | 214.881 | 65.26   | 1.704  | 8.74E-29 |
| IK       | ENSG0000 | 56.141  | 25.39   | 1.115  | 5.67E-66 |
| THBS4    | ENSG0000 | 3.68    | 0.15    | 2.025  | 6.22E-40 |
| LMNB1    | ENSG0000 | 7.73    | 2.21    | 1.443  | 2.22E-27 |
| SUB1     | ENSG0000 | 184.144 | 73.124  | 1.321  | 2.45E-61 |
| LIFR     | ENSG0000 | 0.71    | 3.515   | -1.401 | 4.82E-49 |
| H2AFY    | ENSG0000 | 56.539  | 24.299  | 1.185  | 1.46E-44 |
| PDGFRB   | ENSG0000 | 10.1    | 4.26    | 1.077  | 1.10E-16 |
| USP9Y    | ENSG0000 | 0.4     | 2.55    | -1.342 | 1.78E-14 |
| RPL24    | ENSG0000 | 884.733 | 404.767 | 1.126  | 5.84E-52 |
| SLC41A3  | ENSG0000 | 18.379  | 6.215   | 1.425  | 5.16E-66 |
| PLSCR4   | ENSG0000 | 5.39    | 13.155  | -1.147 | 8.18E-31 |
| RRP9     | ENSG0000 | 12.34   | 5.515   | 1.034  | 3.72E-45 |
| VIPR1    | ENSG0000 | 0.56    | 11.848  | -3.042 | 4.67E-92 |
| SSR3     | ENSG0000 | 89.059  | 40.774  | 1.108  | 4.02E-38 |
| NKTR     | ENSG0000 | 4.61    | 13.3    | -1.35  | 1.96E-10 |
| SPCS1    | ENSG0000 | 167.846 | 78.948  | 1.079  | 7.46E-50 |
| STEAP3   | ENSG0000 | 19.849  | 62.63   | -1.61  | 3.11E-40 |
| TP53I3   | ENSG0000 | 20.09   | 5.15    | 1.778  | 2.13E-35 |
| FNDC4    | ENSG0000 | 22.841  | 53.096  | -1.182 | 9.26E-18 |
| PSMD14   | ENSG0000 | 27.46   | 11.975  | 1.133  | 1.07E-37 |
| PPM1G    | ENSG0000 | 39.769  | 17.025  | 1.177  | 6.71E-53 |
| STAT1    | ENSG0000 | 38.62   | 17.54   | 1.096  | 1.35E-16 |
| PDCL3    | ENSG0000 | 11.29   | 4.515   | 1.156  | 1.68E-53 |
| IL1RL1   | ENSG0000 | 0.08    | 1.33    | -1.109 | 2.80E-34 |
| UXS1     | ENSG0000 | 15.49   | 5.405   | 1.364  | 1.89E-47 |
| RND3     | ENSG0000 | 9.27    | 21.98   | -1.162 | 3.53E-24 |
| FAM20B   | ENSG0000 | 8.97    | 3.605   | 1.114  | 6.50E-49 |
| ERRFI1   | ENSG0000 | 67.672  | 160.379 | -1.233 | 7.82E-19 |
| SCAMP3   | ENSG0000 | 85.793  | 25.355  | 1.72   | 5.81E-83 |
| LAMTOR2  | ENSG0000 | 162.263 | 71.28   | 1.176  | 2.33E-64 |
| UCHL5    | ENSG0000 | 15.85   | 7.27    | 1.027  | 2.61E-26 |
| SRSF11   | ENSG0000 | 25.31   | 68.614  | -1.404 | 8.39E-11 |
| OLFML3   | ENSG0000 | 2.83    | 8.29    | -1.278 | 3.70E-14 |
| TMEM9    | ENSG0000 | 78.102  | 28.145  | 1.44   | 6.19E-64 |
| HAO2     | ENSG0000 | 11.13   | 111.712 | -3.216 | 4.03E-33 |

|          |          |         |         |        |          |
|----------|----------|---------|---------|--------|----------|
| GNPAT    | ENSG0000 | 27.72   | 11.88   | 1.157  | 9.80E-51 |
| TSNAX    | ENSG0000 | 14.6    | 6.555   | 1.046  | 5.62E-45 |
| TBCE     | ENSG0000 | 16.95   | 7.4     | 1.096  | 1.50E-51 |
| KMO      | ENSG0000 | 7.17    | 20.115  | -1.37  | 7.00E-22 |
| HSD11B1  | ENSG0000 | 76.531  | 189.827 | -1.299 | 4.75E-11 |
| IRF6     | ENSG0000 | 21.24   | 9.51    | 1.081  | 3.04E-07 |
| RSRP1    | ENSG0000 | 16.95   | 36.53   | -1.064 | 9.46E-03 |
| STMN1    | ENSG0000 | 56.668  | 6.28    | 2.986  | 1.65E-75 |
| MAN1C1   | ENSG0000 | 4.64    | 13.085  | -1.32  | 1.14E-21 |
| NEK2     | ENSG0000 | 3.21    | 0.11    | 1.923  | 2.38E-51 |
| NENF     | ENSG0000 | 81.311  | 29.561  | 1.429  | 4.92E-71 |
| NSL1     | ENSG0000 | 13.84   | 6.095   | 1.065  | 1.05E-34 |
| TXNDC12  | ENSG0000 | 31.04   | 14.5    | 1.048  | 4.23E-55 |
| MYL12B   | ENSG0000 | 310.295 | 142.938 | 1.113  | 5.47E-42 |
| RPN2     | ENSG0000 | 201.829 | 74.294  | 1.43   | 1.68E-75 |
| SPP1     | ENSG0000 | 75.378  | 8.524   | 3.004  | 2.34E-15 |
| ITGB1BP1 | ENSG0000 | 32.839  | 12.855  | 1.288  | 1.65E-48 |
| PHF19    | ENSG0000 | 6.2     | 1.995   | 1.265  | 3.53E-35 |
| NDUFA8   | ENSG0000 | 57.432  | 27.36   | 1.043  | 3.50E-55 |
| IFI27L2  | ENSG0000 | 12.91   | 4.625   | 1.306  | 1.37E-20 |
| NPC2     | ENSG0000 | 121.456 | 52.019  | 1.208  | 5.03E-45 |
| PPP1R3C  | ENSG0000 | 10.36   | 28.32   | -1.368 | 1.33E-15 |
| HELLS    | ENSG0000 | 1.83    | 0.405   | 1.01   | 1.27E-29 |
| SFRP5    | ENSG0000 | 0.05    | 4.03    | -2.26  | 1.01E-24 |
| MTHFD1L  | ENSG0000 | 4.12    | 1.275   | 1.17   | 1.52E-27 |
| LRP11    | ENSG0000 | 7.82    | 3.315   | 1.032  | 1.44E-31 |
| PDZD11   | ENSG0000 | 30.37   | 11.065  | 1.379  | 4.14E-71 |
| ENY2     | ENSG0000 | 127.009 | 62.88   | 1.003  | 1.36E-46 |
| TGFBI    | ENSG0000 | 114.213 | 51.15   | 1.144  | 5.76E-22 |
| EPHX2    | ENSG0000 | 47.891  | 106.244 | -1.133 | 3.89E-18 |
| ZNF706   | ENSG0000 | 102.992 | 38.45   | 1.398  | 4.72E-59 |
| SCPEP1   | ENSG0000 | 25.849  | 11.89   | 1.059  | 5.18E-11 |
| NCAPH    | ENSG0000 | 2.55    | 0.17    | 1.601  | 2.29E-45 |
| MND1     | ENSG0000 | 2.58    | 0.17    | 1.613  | 4.58E-64 |
| PILRB    | ENSG0000 | 7.6     | 26.129  | -1.657 | 3.78E-11 |
| RPL5     | ENSG0000 | 560.899 | 273.187 | 1.035  | 3.44E-40 |
| FKBP9    | ENSG0000 | 17.64   | 8.315   | 1.001  | 5.14E-27 |
| PLAU     | ENSG0000 | 2.82    | 0.77    | 1.11   | 1.07E-23 |
| ZWINT    | ENSG0000 | 9.69    | 0.865   | 2.519  | 7.03E-58 |
| PKN1     | ENSG0000 | 44.609  | 13.205  | 1.683  | 1.92E-45 |
| ZC3H13   | ENSG0000 | 4.81    | 15.4    | -1.497 | 1.80E-30 |
| OPTN     | ENSG0000 | 50.569  | 22.641  | 1.125  | 2.32E-36 |
| SPATS2   | ENSG0000 | 5.64    | 2.025   | 1.134  | 7.78E-35 |
| ORMDL2   | ENSG0000 | 48.691  | 19.455  | 1.281  | 9.75E-68 |
| NR4A1    | ENSG0000 | 8.57    | 25.707  | -1.481 | 1.62E-17 |
| TUBA1B   | ENSG0000 | 234.996 | 72.433  | 1.684  | 8.76E-30 |
| HJURP    | ENSG0000 | 2.22    | 0.245   | 1.371  | 2.04E-40 |
| G0S2     | ENSG0000 | 46.051  | 133.107 | -1.511 | 9.21E-13 |
| SLC12A5  | ENSG0000 | 2.37    | 0.515   | 1.153  | 6.52E-24 |
| PIGT     | ENSG0000 | 65.05   | 22.78   | 1.474  | 1.20E-72 |
| PTGIS    | ENSG0000 | 0.37    | 1.815   | -1.039 | 1.91E-16 |
| PCK1     | ENSG0000 | 84.799  | 405.426 | -2.244 | 1.54E-23 |
| SNRPC    | ENSG0000 | 118.742 | 39.239  | 1.573  | 4.96E-80 |
| RPS10    | ENSG0000 | 973.069 | 427.846 | 1.184  | 1.26E-42 |
| TBCC     | ENSG0000 | 11.02   | 4.93    | 1.019  | 3.26E-45 |
| KLHDC3   | ENSG0000 | 61.12   | 29.215  | 1.04   | 5.23E-54 |
| GNMT     | ENSG0000 | 30.38   | 90.336  | -1.541 | 8.24E-10 |
| MEA1     | ENSG0000 | 62.691  | 22.585  | 1.433  | 2.41E-84 |

|          |          |         |          |        |           |
|----------|----------|---------|----------|--------|-----------|
| SOX4     | ENSG0000 | 3.07    | 0.71     | 1.251  | 5.22E-16  |
| SSR1     | ENSG0000 | 43.609  | 20.554   | 1.049  | 4.69E-23  |
| RPP40    | ENSG0000 | 7.11    | 3.025    | 1.011  | 2.19E-36  |
| MT1G     | ENSG0000 | 40.209  | 2587.601 | -5.973 | 3.31E-51  |
| MT2A     | ENSG0000 | 261.977 | 2324.572 | -3.145 | 5.54E-41  |
| RAP2A    | ENSG0000 | 5.38    | 1.86     | 1.158  | 1.82E-31  |
| 6-Sep    | ENSG0000 | 22.06   | 9.535    | 1.13   | 9.56E-18  |
| NDUFA1   | ENSG0000 | 183.101 | 75.371   | 1.269  | 2.97E-71  |
| SOX9     | ENSG0000 | 4.95    | 1        | 1.573  | 3.90E-17  |
| MIF4GD   | ENSG0000 | 16.58   | 7.17     | 1.106  | 5.98E-40  |
| PPDPF    | ENSG0000 | 190.982 | 72.223   | 1.391  | 1.61E-16  |
| PLGLB2   | ENSG0000 | 65.348  | 195.78   | -1.568 | 4.11E-23  |
| RPL23    | ENSG0000 | 944.625 | 439.386  | 1.102  | 1.17E-46  |
| TNFSF14  | ENSG0000 | 2.84    | 14.71    | -2.032 | 5.52E-16  |
| FOSB     | ENSG0000 | 1.62    | 4.38     | -1.038 | 3.59E-11  |
| SNRPD2   | ENSG0000 | 193.165 | 70.121   | 1.449  | 8.88E-60  |
| RTN2     | ENSG0000 | 5.1     | 1.68     | 1.187  | 3.26E-19  |
| TGM3     | ENSG0000 | 1.68    | 0.19     | 1.171  | 3.54E-22  |
| SNRPB    | ENSG0000 | 126.473 | 35.895   | 1.789  | 1.23E-70  |
| MKKS     | ENSG0000 | 22.899  | 10.375   | 1.071  | 4.69E-37  |
| SNRPB2   | ENSG0000 | 28.699  | 12.59    | 1.128  | 1.39E-52  |
| NECAB3   | ENSG0000 | 21.341  | 8.84     | 1.183  | 1.03E-53  |
| ID1      | ENSG0000 | 15.63   | 47.12    | -1.533 | 3.47E-20  |
| RALY     | ENSG0000 | 63.039  | 26.163   | 1.237  | 1.08E-57  |
| ERGIC3   | ENSG0000 | 192.324 | 94.039   | 1.024  | 4.39E-64  |
| ROMO1    | ENSG0000 | 249.154 | 86.933   | 1.508  | 3.79E-69  |
| PROZ     | ENSG0000 | 8.74    | 32.433   | -1.779 | 3.48E-29  |
| PDCD2L   | ENSG0000 | 6.35    | 2.57     | 1.042  | 1.95E-47  |
| RBM42    | ENSG0000 | 52.83   | 21.78    | 1.241  | 5.56E-66  |
| HCST     | ENSG0000 | 12.42   | 5.039    | 1.152  | 2.51E-17  |
| PRDX5    | ENSG0000 | 278.165 | 128.23   | 1.111  | 2.65E-66  |
| IFI6     | ENSG0000 | 95.742  | 36.279   | 1.376  | 2.97E-10  |
| TIMM17B  | ENSG0000 | 46.659  | 22.065   | 1.047  | 2.67E-61  |
| PZP      | ENSG0000 | 0.18    | 5.14     | -2.379 | 1.20E-55  |
| TRAF2    | ENSG0000 | 10.5    | 4.355    | 1.103  | 2.86E-43  |
| TSPAN8   | ENSG0000 | 52.008  | 7.16     | 2.7    | 2.31E-22  |
| PKMYT1   | ENSG0000 | 5.72    | 0.695    | 1.987  | 1.95E-56  |
| SMARCA4  | ENSG0000 | 29.769  | 13.425   | 1.093  | 2.20E-50  |
| VIL1     | ENSG0000 | 14.91   | 4.055    | 1.654  | 1.06E-07  |
| SHFM1    | ENSG0000 | 305.07  | 97.133   | 1.641  | 1.47E-81  |
| STYXL1   | ENSG0000 | 31.679  | 14.21    | 1.103  | 1.62E-37  |
| STEAP4   | ENSG0000 | 0.77    | 4.24     | -1.566 | 4.38E-36  |
| ZFP36    | ENSG0000 | 53.742  | 127.304  | -1.229 | 2.91E-21  |
| SRD5A3   | ENSG0000 | 15.24   | 6.015    | 1.211  | 1.74E-50  |
| GNAZ     | ENSG0000 | 2.38    | 0.15     | 1.555  | 1.68E-35  |
| LSM8     | ENSG0000 | 21.201  | 8.135    | 1.281  | 6.01E-51  |
| PODXL    | ENSG0000 | 5.7     | 1.355    | 1.508  | 8.20E-32  |
| SMO      | ENSG0000 | 16.5    | 7.11     | 1.11   | 2.25E-16  |
| KNSTRN   | ENSG0000 | 7.78    | 2.795    | 1.21   | 1.60E-38  |
| RNASE1   | ENSG0000 | 56.531  | 18.8     | 1.539  | 4.55E-29  |
| NEDD8    | ENSG0000 | 160.385 | 77.409   | 1.041  | 5.01E-71  |
| INS-IGF2 | ENSG0000 | 0       | 4.03     | -2.331 | 9.78E-65  |
| PRKCSH   | ENSG0000 | 198.376 | 98.155   | 1.008  | 8.08E-72  |
| THEM6    | ENSG0000 | 35.921  | 16.975   | 1.038  | 1.03E-27  |
| TOMM40   | ENSG0000 | 36.99   | 16.13    | 1.149  | 8.57E-43  |
| RPL36    | ENSG0000 | 739.803 | 336.869  | 1.133  | 1.54E-46  |
| PLVAP    | ENSG0000 | 43.03   | 2.464    | 3.668  | 7.99E-127 |
| NSUN5    | ENSG0000 | 17.259  | 7.33     | 1.132  | 4.49E-59  |

|           |          |          |          |        |          |
|-----------|----------|----------|----------|--------|----------|
| LSM7      | ENSG0000 | 71.848   | 34.91    | 1.021  | 2.95E-46 |
| EPO       | ENSG0000 | 0.19     | 3.185    | -1.814 | 6.95E-16 |
| MAP1S     | ENSG0000 | 14.04    | 5.995    | 1.104  | 2.83E-44 |
| GDF15     | ENSG0000 | 44.51    | 15.795   | 1.438  | 1.80E-15 |
| LSM4      | ENSG0000 | 102.757  | 45.219   | 1.167  | 4.90E-61 |
| H19       | ENSG0000 | 98.988   | 321.895  | -1.691 | 1.02E-02 |
| PNPLA7    | ENSG0000 | 1.7      | 5.1      | -1.176 | 7.03E-45 |
| UBE2M     | ENSG0000 | 40.19    | 17.905   | 1.123  | 1.37E-56 |
| TRIM28    | ENSG0000 | 143.419  | 66.495   | 1.097  | 4.58E-45 |
| SLC6A8    | ENSG0000 | 3.29     | 1.05     | 1.065  | 4.62E-12 |
| HIGD1B    | ENSG0000 | 2.2      | 0.19     | 1.427  | 6.54E-69 |
| GINS2     | ENSG0000 | 2.4      | 0.41     | 1.27   | 1.15E-44 |
| PPT1      | ENSG0000 | 19.291   | 7.325    | 1.285  | 1.05E-31 |
| RAB11FIP4 | ENSG0000 | 5.22     | 1.225    | 1.483  | 3.08E-36 |
| TUBG1     | ENSG0000 | 24.47    | 8.475    | 1.427  | 1.90E-43 |
| RPL27     | ENSG0000 | 1270.164 | 553.58   | 1.197  | 2.01E-54 |
| RAMP2     | ENSG0000 | 17.27    | 5.77     | 1.432  | 1.02E-32 |
| NDUFA2    | ENSG0000 | 139.111  | 64.451   | 1.098  | 2.33E-63 |
| EXOC4     | ENSG0000 | 11.34    | 5.17     | 1      | 6.07E-48 |
| TOP2A     | ENSG0000 | 9.54     | 0.405    | 2.907  | 3.35E-65 |
| PEX11B    | ENSG0000 | 23.079   | 10.54    | 1.061  | 3.73E-58 |
| GCH1      | ENSG0000 | 11.76    | 29.19    | -1.242 | 1.20E-26 |
| LGALS3    | ENSG0000 | 30.231   | 6.845    | 1.993  | 1.84E-25 |
| RAMP1     | ENSG0000 | 103.679  | 31.471   | 1.689  | 1.78E-15 |
| RAN       | ENSG0000 | 208.441  | 81.905   | 1.337  | 2.40E-41 |
| PNISR     | ENSG0000 | 11.81    | 31.325   | -1.335 | 2.01E-08 |
| SEC61G    | ENSG0000 | 167.195  | 79.423   | 1.064  | 8.75E-38 |
| JCHAIN    | ENSG0000 | 2.83     | 8.089    | -1.247 | 1.53E-07 |
| ITGB4     | ENSG0000 | 5.13     | 1.67     | 1.199  | 9.14E-26 |
| XAF1      | ENSG0000 | 7.13     | 29.705   | -1.917 | 1.11E-22 |
| PCNA      | ENSG0000 | 48.09    | 13.71    | 1.739  | 1.99E-57 |
| NES       | ENSG0000 | 5.32     | 1.63     | 1.265  | 6.86E-33 |
| LPIN3     | ENSG0000 | 4.75     | 13.924   | -1.376 | 5.67E-11 |
| PEMT      | ENSG0000 | 50.53    | 119.908  | -1.23  | 5.18E-26 |
| SPG20     | ENSG0000 | 1.55     | 5.41     | -1.33  | 4.11E-21 |
| RFC3      | ENSG0000 | 3.4      | 1.165    | 1.023  | 5.19E-32 |
| GSTT2B    | ENSG0000 | 3.38     | 10.82    | -1.432 | 6.07E-07 |
| SEC14L4   | ENSG0000 | 2.04     | 5.92     | -1.187 | 1.11E-14 |
| SWAP70    | ENSG0000 | 5.09     | 1.985    | 1.029  | 7.00E-23 |
| LYVE1     | ENSG0000 | 0.83     | 7.055    | -2.138 | 1.12E-41 |
| TTC9      | ENSG0000 | 2.24     | 0.43     | 1.18   | 1.69E-22 |
| LOXL2     | ENSG0000 | 3.68     | 1.03     | 1.205  | 1.84E-25 |
| GSTM1     | ENSG0000 | 1.28     | 70.601   | -4.973 | 2.84E-03 |
| SORT1     | ENSG0000 | 7.08     | 1.66     | 1.603  | 2.69E-34 |
| PTGFRN    | ENSG0000 | 10.95    | 4.845    | 1.032  | 4.96E-18 |
| FKBP11    | ENSG0000 | 70.438   | 29.725   | 1.217  | 5.20E-22 |
| TMEM106   | ENSG0000 | 44.05    | 11.765   | 1.819  | 6.54E-59 |
| SAA2      | ENSG0000 | 105.36   | 2489.516 | -4.549 | 4.99E-25 |
| FST       | ENSG0000 | 51.929   | 24.758   | 1.039  | 7.56E-05 |
| FOLH1B    | ENSG0000 | 0.43     | 4.13     | -1.843 | 2.53E-28 |
| TPGS2     | ENSG0000 | 20.93    | 8.2      | 1.253  | 2.54E-30 |
| TIMM10    | ENSG0000 | 60.48    | 29.36    | 1.018  | 4.07E-50 |
| TMEM258   | ENSG0000 | 160.841  | 73.84    | 1.113  | 4.55E-62 |
| PDGFRA    | ENSG0000 | 0.92     | 3.855    | -1.338 | 3.43E-19 |
| STT3A     | ENSG0000 | 76.882   | 32.829   | 1.203  | 1.44E-42 |
| NREP      | ENSG0000 | 17.25    | 7.315    | 1.134  | 3.45E-19 |
| GOLM1     | ENSG0000 | 22.4     | 5.695    | 1.805  | 7.37E-18 |
| SDS       | ENSG0000 | 58.318   | 343.496  | -2.538 | 1.03E-11 |

|          |          |          |         |        |           |
|----------|----------|----------|---------|--------|-----------|
| GLS2     | ENSG0000 | 7.55     | 64.115  | -2.929 | 2.16E-23  |
| TROAP    | ENSG0000 | 6.69     | 0.325   | 2.537  | 3.39E-57  |
| PAN2     | ENSG0000 | 13.25    | 46.264  | -1.73  | 5.37E-17  |
| HNRNPA1  | ENSG0000 | 363.698  | 146.569 | 1.305  | 6.58E-44  |
| GNS      | ENSG0000 | 30.759   | 13.59   | 1.122  | 3.96E-38  |
| NTPCR    | ENSG0000 | 54.161   | 16.505  | 1.656  | 2.67E-68  |
| GLUL     | ENSG0000 | 323.024  | 144.037 | 1.16   | 5.79E-11  |
| PIGC     | ENSG0000 | 22.07    | 6.605   | 1.601  | 1.92E-71  |
| LAMC1    | ENSG0000 | 26.829   | 5.775   | 2.038  | 2.21E-43  |
| STAB2    | ENSG0000 | 0.08     | 3.505   | -2.06  | 1.98E-103 |
| GPNMB    | ENSG0000 | 12.74    | 3.525   | 1.602  | 4.77E-17  |
| RAC1     | ENSG0000 | 116.994  | 54.913  | 1.077  | 8.53E-51  |
| RTP4     | ENSG0000 | 5.18     | 1.725   | 1.181  | 3.68E-22  |
| MRPL47   | ENSG0000 | 30.3     | 14.075  | 1.054  | 8.16E-49  |
| EPRS     | ENSG0000 | 37.111   | 13.56   | 1.388  | 2.11E-61  |
| UGGT1    | ENSG0000 | 14.17    | 5.615   | 1.197  | 1.62E-43  |
| TXN      | ENSG0000 | 347.458  | 121.873 | 1.504  | 1.17E-50  |
| RPS6     | ENSG0000 | 1117.066 | 553.925 | 1.011  | 2.75E-32  |
| YIPF3    | ENSG0000 | 100.002  | 47.349  | 1.063  | 3.77E-55  |
| TMEM14B  | ENSG0000 | 75.572   | 32.725  | 1.183  | 2.85E-60  |
| TUBB2A   | ENSG0000 | 60.17    | 28.979  | 1.029  | 8.62E-16  |
| LRRC1    | ENSG0000 | 2.35     | 0.34    | 1.322  | 2.45E-27  |
| UQCC2    | ENSG0000 | 98.373   | 32.169  | 1.583  | 7.45E-74  |
| HMGA1    | ENSG0000 | 36.319   | 6.9     | 2.24   | 8.96E-51  |
| TCF19    | ENSG0000 | 4.27     | 0.44    | 1.872  | 6.76E-47  |
| NRM      | ENSG0000 | 8.47     | 2.63    | 1.383  | 1.91E-38  |
| MYO7A    | ENSG0000 | 4.79     | 10.68   | -1.012 | 2.15E-13  |
| MRPL15   | ENSG0000 | 50.699   | 24.155  | 1.039  | 2.07E-40  |
| GGH      | ENSG0000 | 121.852  | 51.186  | 1.235  | 1.99E-17  |
| SORL1    | ENSG0000 | 6.55     | 15      | -1.084 | 1.74E-23  |
| NUSAP1   | ENSG0000 | 8.31     | 1.675   | 1.799  | 2.72E-40  |
| KIF23    | ENSG0000 | 1.48     | 0.19    | 1.059  | 7.83E-31  |
| RPLP1    | ENSG0000 | 1491.242 | 599.659 | 1.313  | 5.50E-68  |
| ITPKA    | ENSG0000 | 3.46     | 0.555   | 1.52   | 3.00E-30  |
| RPL7P9   | ENSG0000 | 28.391   | 9.16    | 1.533  | 1.79E-48  |
| SLC3A1   | ENSG0000 | 0.66     | 2.48    | -1.068 | 4.67E-03  |
| LOXL4    | ENSG0000 | 3.58     | 0.72    | 1.413  | 6.30E-08  |
| OIT3     | ENSG0000 | 2.66     | 15.075  | -2.135 | 1.80E-52  |
| RPS24    | ENSG0000 | 1646.514 | 799.358 | 1.042  | 1.33E-38  |
| METTL5   | ENSG0000 | 34.82    | 15.849  | 1.088  | 4.15E-61  |
| OLA1     | ENSG0000 | 40.941   | 16.146  | 1.291  | 2.43E-44  |
| UBL7     | ENSG0000 | 29.531   | 12.445  | 1.183  | 4.75E-68  |
| FAM13A   | ENSG0000 | 3.1      | 15.24   | -1.986 | 1.03E-33  |
| RASGEF1B | ENSG0000 | 4.63     | 11.45   | -1.145 | 8.14E-25  |
| LEF1     | ENSG0000 | 2.67     | 0.29    | 1.508  | 8.05E-29  |
| PAPSS1   | ENSG0000 | 6.5      | 2.495   | 1.102  | 1.33E-25  |
| MAPK8IP3 | ENSG0000 | 5.62     | 18.72   | -1.575 | 5.30E-08  |
| ZCRB1    | ENSG0000 | 33.481   | 15.205  | 1.089  | 1.97E-48  |
| RPL14P1  | ENSG0000 | 9.55     | 3.85    | 1.121  | 3.84E-40  |
| SNRPF    | ENSG0000 | 27.971   | 13.225  | 1.026  | 4.38E-44  |
| FAM222A  | ENSG0000 | 4.25     | 1.125   | 1.305  | 9.68E-36  |
| SLC46A3  | ENSG0000 | 11.35    | 23.705  | -1     | 1.20E-15  |
| SLC39A5  | ENSG0000 | 52.399   | 108.891 | -1.041 | 3.77E-11  |
| RDH16    | ENSG0000 | 39.609   | 193.762 | -2.262 | 4.68E-32  |
| NABP2    | ENSG0000 | 19.38    | 7.77    | 1.217  | 5.42E-57  |
| N4BP2L1  | ENSG0000 | 12.22    | 28.05   | -1.136 | 5.56E-34  |
| VPS33A   | ENSG0000 | 7.39     | 3.075   | 1.042  | 3.20E-40  |
| SLAIN1   | ENSG0000 | 0.63     | 2.575   | -1.133 | 7.08E-22  |

|          |          |         |         |        |          |
|----------|----------|---------|---------|--------|----------|
| FITM1    | ENSG0000 | 1.31    | 7.18    | -1.824 | 3.99E-55 |
| SLC38A6  | ENSG0000 | 6.79    | 2.24    | 1.266  | 5.55E-61 |
| SLC25A47 | ENSG0000 | 13.85   | 213.567 | -3.853 | 3.91E-45 |
| GTF2A2   | ENSG0000 | 61.158  | 26.395  | 1.182  | 1.28E-61 |
| SRP14    | ENSG0000 | 253.474 | 113.165 | 1.156  | 1.94E-66 |
| UBE2Q2   | ENSG0000 | 5.68    | 2.01    | 1.15   | 1.86E-21 |
| NEIL1    | ENSG0000 | 8.76    | 20.924  | -1.168 | 1.85E-11 |
| FANCI    | ENSG0000 | 3.08    | 0.565   | 1.382  | 1.22E-44 |
| OSGIN1   | ENSG0000 | 89.492  | 40.993  | 1.108  | 1.48E-08 |
| SKAP1    | ENSG0000 | 7.37    | 17.729  | -1.162 | 9.64E-12 |
| PTRH2    | ENSG0000 | 27.851  | 13.168  | 1.026  | 6.31E-49 |
| SLC13A5  | ENSG0000 | 60.4    | 161.954 | -1.408 | 6.58E-20 |
| SECTM1   | ENSG0000 | 5.34    | 2.085   | 1.039  | 4.35E-19 |
| RNF157   | ENSG0000 | 3.3     | 0.58    | 1.444  | 5.21E-26 |
| RNF165   | ENSG0000 | 0.16    | 1.53    | -1.125 | 1.29E-60 |
| P3H4     | ENSG0000 | 3.91    | 1.29    | 1.1    | 3.48E-29 |
| SAMD1    | ENSG0000 | 17.89   | 7.82    | 1.099  | 1.55E-40 |
| SLC39A3  | ENSG0000 | 29.3    | 11.91   | 1.231  | 6.69E-58 |
| SIK1     | ENSG0000 | 1.57    | 4.18    | -1.011 | 6.29E-07 |
| SAE1     | ENSG0000 | 33.261  | 12.505  | 1.343  | 1.26E-52 |
| TM4SF5   | ENSG0000 | 200.31  | 92.641  | 1.104  | 3.90E-09 |
| RPS11    | ENSG0000 | 1591.31 | 734.489 | 1.114  | 3.62E-54 |
| SH3BGRL3 | ENSG0000 | 70.629  | 32.565  | 1.094  | 7.00E-26 |
| FCN3     | ENSG0000 | 2.32    | 67.3    | -4.363 | 1.37E-68 |
| HSPG2    | ENSG0000 | 22.611  | 8.685   | 1.286  | 9.63E-24 |
| ITGB3BP  | ENSG0000 | 8.56    | 3.155   | 1.202  | 6.97E-46 |
| KIF2C    | ENSG0000 | 2.21    | 0.17    | 1.456  | 6.33E-43 |
| SLC44A3  | ENSG0000 | 6.79    | 1.63    | 1.567  | 4.44E-26 |
| TIPRL    | ENSG0000 | 13.95   | 6.325   | 1.029  | 5.64E-42 |
| MPC2     | ENSG0000 | 279.053 | 110.929 | 1.323  | 4.12E-61 |
| UCK2     | ENSG0000 | 18.22   | 6       | 1.457  | 5.06E-48 |
| TMCO1    | ENSG0000 | 124.94  | 41.106  | 1.581  | 1.55E-60 |
| RFWD2    | ENSG0000 | 30.789  | 12.06   | 1.283  | 9.26E-68 |
| UFC1     | ENSG0000 | 97.497  | 33.145  | 1.528  | 7.85E-76 |
| NUF2     | ENSG0000 | 2.48    | 0.13    | 1.623  | 8.54E-46 |
| RGS5     | ENSG0000 | 18.01   | 4.01    | 1.924  | 2.20E-34 |
| PFDN2    | ENSG0000 | 104.959 | 42.964  | 1.269  | 3.23E-57 |
| PRCC     | ENSG0000 | 41.28   | 15.355  | 1.37   | 7.36E-76 |
| MRPL24   | ENSG0000 | 161.735 | 54.922  | 1.541  | 2.07E-75 |
| LYPLAL1  | ENSG0000 | 36.221  | 14.405  | 1.273  | 2.19E-48 |
| SF3B4    | ENSG0000 | 35.839  | 10.79   | 1.644  | 1.44E-68 |
| ZNF687   | ENSG0000 | 11.88   | 4.36    | 1.265  | 3.11E-45 |
| RFX5     | ENSG0000 | 10.55   | 3.49    | 1.363  | 4.80E-36 |
| MRPL9    | ENSG0000 | 49.261  | 19.215  | 1.314  | 1.94E-66 |
| GOLPH3L  | ENSG0000 | 9.31    | 3.605   | 1.163  | 6.65E-38 |
| SMYD2    | ENSG0000 | 30.199  | 12.82   | 1.175  | 1.71E-33 |
| SUSD4    | ENSG0000 | 3.92    | 1.295   | 1.1    | 1.23E-08 |
| TP53BP2  | ENSG0000 | 12.89   | 4.945   | 1.224  | 1.25E-22 |
| S100A8   | ENSG0000 | 3.42    | 29.025  | -2.764 | 1.36E-39 |
| TPM3     | ENSG0000 | 124.154 | 46.16   | 1.408  | 3.43E-50 |
| SNAPIN   | ENSG0000 | 32.479  | 15.445  | 1.026  | 1.25E-54 |
| SLC39A1  | ENSG0000 | 72.098  | 29.34   | 1.269  | 8.80E-45 |
| HAX1     | ENSG0000 | 107.328 | 46.864  | 1.178  | 6.03E-70 |
| ILF2     | ENSG0000 | 80.991  | 27.02   | 1.549  | 3.65E-67 |
| SRP9     | ENSG0000 | 168.685 | 79.5    | 1.076  | 2.63E-44 |
| PARP1    | ENSG0000 | 36.99   | 15.685  | 1.187  | 1.12E-34 |
| PSEN2    | ENSG0000 | 14.1    | 6.11    | 1.087  | 1.08E-31 |
| PYCR2    | ENSG0000 | 40.649  | 18.06   | 1.128  | 1.26E-48 |

|           |          |          |         |        |          |
|-----------|----------|----------|---------|--------|----------|
| EPHX1     | ENSG0000 | 1532.848 | 505.37  | 1.599  | 2.23E-17 |
| PDIA6     | ENSG0000 | 159.155  | 77.753  | 1.024  | 3.64E-27 |
| FBLN7     | ENSG0000 | 6.2      | 2.045   | 1.242  | 1.89E-27 |
| TRPM8     | ENSG0000 | 4.06     | 10.085  | -1.131 | 5.06E-12 |
| FANCD2    | ENSG0000 | 2.68     | 0.595   | 1.206  | 8.55E-35 |
| FAM198A   | ENSG0000 | 0.36     | 3.95    | -1.864 | 4.73E-34 |
| RPL32     | ENSG0000 | 1338.312 | 560.083 | 1.255  | 1.99E-50 |
| RP11-977K | ENSG0000 | 1.01     | 0       | 1.007  | 1.70E-11 |
| NFKBIZ    | ENSG0000 | 3.85     | 18.334  | -1.995 | 1.07E-34 |
| NR1I2     | ENSG0000 | 9.26     | 30.295  | -1.609 | 2.22E-27 |
| PLAC8     | ENSG0000 | 1.03     | 5.975   | -1.781 | 4.43E-28 |
| NDUFS6    | ENSG0000 | 89.12    | 35.605  | 1.3    | 6.13E-68 |
| RPL37     | ENSG0000 | 1566.576 | 594.465 | 1.396  | 2.08E-66 |
| TSLP      | ENSG0000 | 0.33     | 2.1     | -1.221 | 2.45E-42 |
| NHP2      | ENSG0000 | 99.332   | 37.635  | 1.377  | 6.68E-71 |
| TBC1D7    | ENSG0000 | 15.92    | 6.43    | 1.187  | 8.27E-60 |
| ZMAT2     | ENSG0000 | 48.509   | 23.279  | 1.028  | 1.50E-47 |
| HIGD2A    | ENSG0000 | 145.804  | 67.002  | 1.11   | 1.48E-68 |
| FAM193B   | ENSG0000 | 17.13    | 46.951  | -1.403 | 3.06E-04 |
| TNFRSF21  | ENSG0000 | 5.45     | 2.02    | 1.095  | 5.04E-13 |
| PRIM2     | ENSG0000 | 4.04     | 1.06    | 1.291  | 2.40E-57 |
| NFKBIE    | ENSG0000 | 11.85    | 4.04    | 1.35   | 4.40E-28 |
| RSPO3     | ENSG0000 | 0.06     | 1.57    | -1.278 | 2.81E-43 |
| IGFBP3    | ENSG0000 | 49.428   | 164.471 | -1.714 | 1.52E-24 |
| PSPH      | ENSG0000 | 8.69     | 2.705   | 1.387  | 2.07E-35 |
| TMEM209   | ENSG0000 | 5.27     | 2.015   | 1.056  | 2.42E-34 |
| NCAPG2    | ENSG0000 | 2.93     | 0.895   | 1.052  | 3.71E-28 |
| TMEM27    | ENSG0000 | 1.03     | 7.24    | -2.021 | 5.51E-33 |
| GPC3      | ENSG0000 | 148.158  | 0.92    | 6.28   | 6.38E-59 |
| SLC25A37  | ENSG0000 | 4.4      | 12.924  | -1.367 | 8.04E-34 |
| RPL7      | ENSG0000 | 1178.47  | 467.589 | 1.332  | 4.79E-43 |
| POLR2K    | ENSG0000 | 55.819   | 19.015  | 1.505  | 8.99E-80 |
| NDUFB9    | ENSG0000 | 377.752  | 144.862 | 1.377  | 2.15E-64 |
| TATDN1    | ENSG0000 | 22.869   | 8.72    | 1.296  | 7.80E-54 |
| RP11-35N  | ENSG0000 | 3.71     | 1.305   | 1.031  | 1.27E-21 |
| GSN       | ENSG0000 | 85.882   | 37.655  | 1.168  | 6.32E-15 |
| LCN2      | ENSG0000 | 38.101   | 5.525   | 2.583  | 1.58E-13 |
| MKI67     | ENSG0000 | 2.9      | 0.17    | 1.737  | 6.18E-46 |
| RGS10     | ENSG0000 | 7.6      | 1.915   | 1.561  | 4.08E-31 |
| SAA4      | ENSG0000 | 251.479  | 770.846 | -1.612 | 7.75E-21 |
| PAMR1     | ENSG0000 | 0.7      | 2.855   | -1.181 | 6.04E-24 |
| GLYAT     | ENSG0000 | 35.37    | 138.764 | -1.942 | 3.66E-18 |
| SERPINH1  | ENSG0000 | 37.121   | 15.61   | 1.199  | 5.16E-20 |
| ST14      | ENSG0000 | 8.05     | 2.715   | 1.285  | 2.33E-11 |
| PLCH2     | ENSG0000 | 0.57     | 2.5     | -1.157 | 6.00E-03 |
| TMEM25    | ENSG0000 | 2.85     | 7.29    | -1.107 | 1.37E-21 |
| FAU       | ENSG0000 | 796.206  | 363.206 | 1.13   | 2.00E-62 |
| TM7SF2    | ENSG0000 | 103.407  | 41.026  | 1.313  | 3.57E-16 |
| TMCO3     | ENSG0000 | 15.33    | 5.335   | 1.366  | 1.16E-24 |
| LYPD1     | ENSG0000 | 2.34     | 0.225   | 1.447  | 3.30E-24 |
| GPM6A     | ENSG0000 | 0.16     | 1.64    | -1.186 | 9.84E-45 |
| PRSS53    | ENSG0000 | 0.23     | 4.55    | -2.174 | 2.46E-52 |
| MAT1A     | ENSG0000 | 220.907  | 484.649 | -1.13  | 7.57E-19 |
| THRSP     | ENSG0000 | 6.27     | 72.531  | -3.338 | 4.00E-20 |
| NDUFC2    | ENSG0000 | 323.853  | 140.872 | 1.195  | 2.15E-56 |
| ITIH2     | ENSG0000 | 623.739  | 212.342 | 1.55   | 1.81E-09 |
| TMEM45B   | ENSG0000 | 29.9     | 8.1     | 1.764  | 7.97E-11 |
| TDO2      | ENSG0000 | 76.478   | 213.996 | -1.472 | 1.71E-17 |

|           |          |          |         |        |           |
|-----------|----------|----------|---------|--------|-----------|
| GEMIN6    | ENSG0000 | 11.22    | 5.08    | 1.007  | 7.82E-55  |
| HAUS1     | ENSG0000 | 8.63     | 3.675   | 1.043  | 4.37E-37  |
| SPC25     | ENSG0000 | 2.11     | 0.16    | 1.423  | 3.18E-47  |
| SPARCL1   | ENSG0000 | 19.1     | 4.845   | 1.782  | 1.87E-22  |
| GJA1      | ENSG0000 | 4.23     | 1.415   | 1.115  | 3.08E-18  |
| GGPS1     | ENSG0000 | 12.93    | 5.865   | 1.021  | 4.77E-50  |
| RASSF3    | ENSG0000 | 6.27     | 2.21    | 1.179  | 1.48E-21  |
| SLC25A27  | ENSG0000 | 2.23     | 11.03   | -1.897 | 7.15E-23  |
| FAM49B    | ENSG0000 | 17.579   | 7.295   | 1.163  | 1.50E-28  |
| LINC00467 | ENSG0000 | 10.37    | 4.585   | 1.026  | 1.15E-42  |
| THY1      | ENSG0000 | 20.42    | 1.995   | 2.838  | 1.97E-62  |
| FAM134B   | ENSG0000 | 2.32     | 9.124   | -1.609 | 1.44E-17  |
| TCEB1     | ENSG0000 | 67.911   | 26.575  | 1.321  | 2.54E-55  |
| LY96      | ENSG0000 | 8.45     | 3.375   | 1.111  | 7.04E-14  |
| SKA1      | ENSG0000 | 1.33     | 0.04    | 1.164  | 7.50E-40  |
| ZCCHC10   | ENSG0000 | 18.15    | 8.21    | 1.056  | 1.41E-57  |
| RHOC      | ENSG0000 | 174.755  | 63.284  | 1.451  | 4.75E-51  |
| KDM8      | ENSG0000 | 5.66     | 45.724  | -2.811 | 9.08E-45  |
| VBP1      | ENSG0000 | 18.29    | 8.53    | 1.017  | 3.50E-39  |
| NAT2      | ENSG0000 | 2.28     | 27.324  | -3.11  | 1.07E-60  |
| SLC28A1   | ENSG0000 | 8.97     | 30.939  | -1.68  | 7.70E-22  |
| UQCRB     | ENSG0000 | 349.269  | 129.912 | 1.42   | 4.17E-69  |
| RPL30     | ENSG0000 | 1964.708 | 654.091 | 1.585  | 1.70E-64  |
| HKDC1     | ENSG0000 | 8.11     | 1.01    | 2.18   | 3.33E-23  |
| UTP14A    | ENSG0000 | 7.05     | 2.75    | 1.102  | 2.94E-44  |
| WDYHV1    | ENSG0000 | 8.96     | 3.605   | 1.113  | 2.23E-42  |
| FBXO32    | ENSG0000 | 4.23     | 1.22    | 1.236  | 3.93E-29  |
| NSMCE2    | ENSG0000 | 20.92    | 5.565   | 1.739  | 4.91E-85  |
| PDE6D     | ENSG0000 | 11.73    | 5.08    | 1.066  | 9.55E-46  |
| NRG1      | ENSG0000 | 0.45     | 2.87    | -1.416 | 1.20E-10  |
| MMP14     | ENSG0000 | 15       | 5       | 1.415  | 6.88E-21  |
| SLC35B2   | ENSG0000 | 32.739   | 13.99   | 1.17   | 4.34E-43  |
| TMEM164   | ENSG0000 | 2.59     | 0.78    | 1.012  | 5.00E-28  |
| PSMG3     | ENSG0000 | 31.519   | 11.92   | 1.332  | 7.20E-62  |
| KRTCAP3   | ENSG0000 | 1.41     | 6.48    | -1.634 | 1.47E-04  |
| MRPL17    | ENSG0000 | 33.91    | 14.065  | 1.212  | 5.09E-61  |
| FANCC     | ENSG0000 | 2.86     | 7.004   | -1.052 | 1.14E-24  |
| TAGLN2    | ENSG0000 | 252.545  | 76.164  | 1.716  | 3.34E-43  |
| SLAMF8    | ENSG0000 | 2.05     | 0.415   | 1.108  | 2.94E-20  |
| OR10J6P   | ENSG0000 | 0.62     | 5.62    | -2.031 | 6.99E-38  |
| FAM160B2  | ENSG0000 | 9.28     | 22.195  | -1.174 | 1.12E-07  |
| MIS18A    | ENSG0000 | 4.36     | 1.595   | 1.047  | 1.36E-38  |
| STC1      | ENSG0000 | 2.25     | 0.325   | 1.294  | 2.19E-22  |
| RCAN1     | ENSG0000 | 17.179   | 48.371  | -1.441 | 5.50E-43  |
| SNF8      | ENSG0000 | 88.101   | 39.81   | 1.127  | 1.69E-58  |
| PSMD4     | ENSG0000 | 242.576  | 78.784  | 1.61   | 2.53E-79  |
| PSMB4     | ENSG0000 | 347.073  | 134.526 | 1.361  | 3.11E-83  |
| UROC1     | ENSG0000 | 3.89     | 38.638  | -3.019 | 9.88E-33  |
| SPON2     | ENSG0000 | 94.851   | 45.069  | 1.057  | 1.97E-17  |
| TPPP3     | ENSG0000 | 4.09     | 1.46    | 1.049  | 3.36E-13  |
| G6PD      | ENSG0000 | 9.9      | 2.875   | 1.492  | 1.33E-28  |
| SPATC1L   | ENSG0000 | 3.81     | 0.41    | 1.77   | 3.21E-38  |
| FCN2      | ENSG0000 | 0.28     | 30.658  | -4.628 | 2.54E-103 |
| GPSM1     | ENSG0000 | 3.67     | 1.165   | 1.109  | 1.63E-18  |
| TLCD1     | ENSG0000 | 16.11    | 4.87    | 1.543  | 4.12E-47  |
| FLAD1     | ENSG0000 | 34.291   | 12.85   | 1.349  | 4.75E-73  |
| SHC1      | ENSG0000 | 58.189   | 27.29   | 1.065  | 5.31E-27  |
| UBE2Q1    | ENSG0000 | 39.719   | 15.774  | 1.279  | 3.97E-40  |



|          |          |          |         |        |           |
|----------|----------|----------|---------|--------|-----------|
| FDPS     | ENSG0000 | 291.63   | 108.698 | 1.416  | 2.85E-38  |
| RUSC1    | ENSG0000 | 10.76    | 4.85    | 1.007  | 2.44E-33  |
| FAM189B  | ENSG0000 | 12.53    | 4.445   | 1.313  | 1.79E-47  |
| PMF1     | ENSG0000 | 61.158   | 26.235  | 1.191  | 2.11E-61  |
| LMNA     | ENSG0000 | 175.52   | 45.859  | 1.913  | 4.12E-85  |
| PTH1R    | ENSG0000 | 1.32     | 23.575  | -3.405 | 1.44E-102 |
| GPATCH4  | ENSG0000 | 18.181   | 7.33    | 1.203  | 2.74E-34  |
| HK3      | ENSG0000 | 1.21     | 4.105   | -1.208 | 1.17E-20  |
| LY6E     | ENSG0000 | 54.53    | 259.294 | -2.229 | 6.44E-29  |
| VPS28    | ENSG0000 | 192.071  | 76.699  | 1.313  | 3.18E-66  |
| RECQL4   | ENSG0000 | 8.65     | 1.435   | 1.987  | 6.01E-51  |
| SQSTM1   | ENSG0000 | 460.225  | 152.9   | 1.583  | 1.68E-40  |
| RPL8     | ENSG0000 | 1876.722 | 569.775 | 1.718  | 6.14E-59  |
| RACGAP1  | ENSG0000 | 4.61     | 0.705   | 1.718  | 1.73E-50  |
| SPC24    | ENSG0000 | 5.15     | 0.33    | 2.209  | 5.18E-66  |
| IP6K3    | ENSG0000 | 0.36     | 2.394   | -1.319 | 3.14E-09  |
| PAQR4    | ENSG0000 | 3.82     | 0.8     | 1.421  | 7.08E-32  |
| FLYWCH2  | ENSG0000 | 14.31    | 4.85    | 1.388  | 1.74E-39  |
| UBXN1    | ENSG0000 | 75.378   | 36.076  | 1.043  | 4.46E-62  |
| RPL29    | ENSG0000 | 1049.145 | 487.919 | 1.103  | 1.66E-49  |
| PDZK1IP1 | ENSG0000 | 15.74    | 1.505   | 2.74   | 1.12E-16  |
| FAM151A  | ENSG0000 | 0.45     | 2.274   | -1.175 | 1.09E-05  |
| RBP7     | ENSG0000 | 17.259   | 2.635   | 2.329  | 3.32E-59  |
| TMEM82   | ENSG0000 | 5.08     | 21.11   | -1.863 | 2.33E-21  |
| LAPTM5   | ENSG0000 | 28.489   | 13.69   | 1.005  | 3.00E-11  |
| RBBP4    | ENSG0000 | 30.969   | 14.58   | 1.037  | 1.25E-12  |
| KIAA1522 | ENSG0000 | 11.99    | 3.85    | 1.421  | 4.79E-36  |
| GBP2     | ENSG0000 | 45.972   | 15.32   | 1.525  | 3.30E-36  |
| IGSF8    | ENSG0000 | 46.529   | 21.859  | 1.056  | 1.58E-26  |
| PEA15    | ENSG0000 | 45.819   | 12.42   | 1.803  | 3.81E-58  |
| NCSTN    | ENSG0000 | 62.552   | 26.736  | 1.196  | 1.96E-34  |
| OLFML2B  | ENSG0000 | 2.78     | 0.275   | 1.568  | 3.12E-45  |
| FLVCR1   | ENSG0000 | 3.43     | 0.705   | 1.378  | 3.91E-51  |
| MT2P1    | ENSG0000 | 0        | 7.11    | -3.02  | 1.10E-64  |
| MRPL55   | ENSG0000 | 113.739  | 49.114  | 1.195  | 2.74E-56  |
| H3F3A    | ENSG0000 | 397.496  | 139.034 | 1.509  | 9.56E-73  |
| INHBB    | ENSG0000 | 10.18    | 4.304   | 1.076  | 1.55E-09  |
| SCNM1    | ENSG0000 | 33.21    | 10.825  | 1.533  | 9.85E-72  |
| VPS72    | ENSG0000 | 28.489   | 8.295   | 1.666  | 7.94E-78  |
| S100A11  | ENSG0000 | 77.321   | 36.376  | 1.067  | 7.15E-13  |
| SPRR3    | ENSG0000 | 0        | 1.315   | -1.211 | 5.13E-29  |
| S100A9   | ENSG0000 | 11.29    | 46.889  | -1.962 | 1.32E-14  |
| S100A12  | ENSG0000 | 0.19     | 3.425   | -1.895 | 2.35E-62  |
| PMVK     | ENSG0000 | 77.262   | 35.51   | 1.1    | 2.50E-58  |
| PBXIP1   | ENSG0000 | 38.369   | 13.51   | 1.44   | 5.51E-53  |
| PYGO2    | ENSG0000 | 15.31    | 6.875   | 1.05   | 1.25E-47  |
| TMEM183  | ENSG0000 | 27.02    | 12.51   | 1.052  | 5.56E-52  |
| KRTCAP2  | ENSG0000 | 342.651  | 102.454 | 1.732  | 1.10E-93  |
| SSR2     | ENSG0000 | 259.267  | 82.939  | 1.633  | 6.01E-67  |
| HDAC11   | ENSG0000 | 8.49     | 2.1     | 1.614  | 4.48E-54  |
| SERPINI1 | ENSG0000 | 3.56     | 0.94    | 1.233  | 6.41E-31  |
| RPL22L1  | ENSG0000 | 61.469   | 28.814  | 1.067  | 3.95E-20  |
| THOC7    | ENSG0000 | 41.271   | 19.789  | 1.024  | 1.66E-54  |
| GMPS     | ENSG0000 | 19.41    | 6.88    | 1.373  | 9.06E-52  |
| MTHFD2L  | ENSG0000 | 3.57     | 9.69    | -1.226 | 7.44E-37  |
| RPN1     | ENSG0000 | 160.362  | 76.362  | 1.061  | 9.65E-46  |
| RFC4     | ENSG0000 | 12.42    | 3.89    | 1.457  | 1.42E-48  |
| RPL39L   | ENSG0000 | 5.42     | 1.46    | 1.384  | 1.23E-15  |

|          |          |         |          |        |          |
|----------|----------|---------|----------|--------|----------|
| TKT      | ENSG0000 | 113.921 | 35.77    | 1.644  | 3.14E-33 |
| LRPAP1   | ENSG0000 | 95.259  | 43.646   | 1.108  | 2.91E-40 |
| S100P    | ENSG0000 | 6.05    | 2.36     | 1.069  | 1.30E-08 |
| H2AFZ    | ENSG0000 | 99.808  | 32.785   | 1.577  | 4.21E-53 |
| PLXNB1   | ENSG0000 | 30.89   | 67.29    | -1.099 | 9.51E-09 |
| TEX264   | ENSG0000 | 62.651  | 29.615   | 1.056  | 3.68E-67 |
| POC1A    | ENSG0000 | 4.81    | 1.72     | 1.095  | 4.36E-44 |
| HMGB2    | ENSG0000 | 34.871  | 11.52    | 1.519  | 1.95E-43 |
| HAND2    | ENSG0000 | 0.4     | 5.02     | -2.104 | 1.16E-45 |
| MAD2L1   | ENSG0000 | 3.9     | 0.535    | 1.675  | 1.61E-47 |
| HPGD     | ENSG0000 | 14.55   | 40.456   | -1.415 | 6.59E-12 |
| NPY1R    | ENSG0000 | 0.4     | 2.24     | -1.211 | 1.79E-37 |
| HHIP     | ENSG0000 | 0.06    | 1.475    | -1.223 | 2.21E-43 |
| NDUFAF2  | ENSG0000 | 25.06   | 11.515   | 1.058  | 6.33E-43 |
| NDUFS4   | ENSG0000 | 82.081  | 38.374   | 1.077  | 4.28E-45 |
| SPINK1   | ENSG0000 | 187.155 | 23.855   | 2.92   | 1.47E-06 |
| ESM1     | ENSG0000 | 3.22    | 0.09     | 1.953  | 1.59E-52 |
| NSA2     | ENSG0000 | 56.629  | 26.857   | 1.049  | 7.30E-45 |
| RPS14    | ENSG0000 | 955.822 | 419.331  | 1.187  | 1.83E-54 |
| PTTG1    | ENSG0000 | 20.589  | 0.87     | 3.529  | 5.59E-80 |
| KCNK5    | ENSG0000 | 1.67    | 4.375    | -1.009 | 3.47E-14 |
| FABP5    | ENSG0000 | 16.66   | 2.88     | 2.186  | 1.76E-44 |
| RAD21    | ENSG0000 | 33.499  | 14.025   | 1.199  | 1.17E-29 |
| TMEM184  | ENSG0000 | 5.88    | 13.27    | -1.052 | 3.29E-07 |
| YWHAZ    | ENSG0000 | 107.38  | 40.699   | 1.378  | 1.29E-36 |
| KIAA1429 | ENSG0000 | 32.019  | 13.155   | 1.222  | 4.60E-66 |
| KIAA0196 | ENSG0000 | 15.47   | 6.095    | 1.215  | 2.18E-52 |
| NUDT2    | ENSG0000 | 20.569  | 9.42     | 1.05   | 1.35E-43 |
| FBP1     | ENSG0000 | 116.403 | 296.902  | -1.343 | 4.11E-20 |
| WBSCR27  | ENSG0000 | 3.28    | 0.965    | 1.123  | 2.17E-25 |
| NDUFB6   | ENSG0000 | 61.601  | 29.35    | 1.044  | 8.17E-52 |
| MELK     | ENSG0000 | 2.23    | 0.1      | 1.554  | 1.08E-44 |
| SPTSSA   | ENSG0000 | 24.609  | 11.13    | 1.078  | 1.28E-21 |
| FOLR2    | ENSG0000 | 10.76   | 4.165    | 1.187  | 2.82E-09 |
| MBL2     | ENSG0000 | 12.81   | 37.715   | -1.487 | 4.36E-18 |
| HEPACAM  | ENSG0000 | 0.07    | 1.355    | -1.138 | 2.67E-04 |
| SKA3     | ENSG0000 | 1.16    | 0.07     | 1.013  | 1.35E-39 |
| KIAA1462 | ENSG0000 | 3.31    | 0.52     | 1.504  | 9.40E-51 |
| NDRG2    | ENSG0000 | 83.239  | 176.349  | -1.074 | 4.03E-23 |
| PRAP1    | ENSG0000 | 676.102 | 259.618  | 1.377  | 4.48E-05 |
| PSMC3    | ENSG0000 | 107.507 | 52.736   | 1.014  | 1.17E-59 |
| IFI27L1  | ENSG0000 | 14.55   | 4.515    | 1.495  | 1.39E-60 |
| IFI27    | ENSG0000 | 145.209 | 26.64    | 2.403  | 3.73E-19 |
| TPP1     | ENSG0000 | 67.568  | 32.47    | 1.035  | 2.90E-23 |
| MOGAT2   | ENSG0000 | 5.55    | 49.036   | -2.933 | 1.71E-41 |
| RIC3     | ENSG0000 | 0.07    | 1.775    | -1.375 | 1.08E-35 |
| WDR72    | ENSG0000 | 1.77    | 8.21     | -1.733 | 1.72E-23 |
| TRIM66   | ENSG0000 | 0.84    | 3.18     | -1.184 | 1.30E-17 |
| RPL27A   | ENSG0000 | 1599.05 | 693.57   | 1.204  | 5.94E-51 |
| MFAP4    | ENSG0000 | 3.46    | 14.005   | -1.75  | 2.29E-16 |
| MCM7     | ENSG0000 | 32.919  | 12.145   | 1.368  | 6.89E-41 |
| TMED3    | ENSG0000 | 20.71   | 6.7      | 1.495  | 1.13E-09 |
| SEC11C   | ENSG0000 | 180.33  | 89.39    | 1.004  | 4.71E-25 |
| NGFRAP1  | ENSG0000 | 82.928  | 34.27    | 1.251  | 1.48E-06 |
| NNMT     | ENSG0000 | 269.342 | 1779.553 | -2.719 | 8.31E-23 |
| PPIB     | ENSG0000 | 710.208 | 316.299  | 1.164  | 2.58E-57 |
| KIAA0101 | ENSG0000 | 9.86    | 1.51     | 2.113  | 9.70E-50 |
| PLIN1    | ENSG0000 | 1.84    | 8.99     | -1.815 | 7.43E-29 |

|           |          |         |          |        |          |
|-----------|----------|---------|----------|--------|----------|
| MESP1     | ENSG0000 | 3.86    | 0.96     | 1.31   | 6.00E-48 |
| GLYATL1   | ENSG0000 | 44.609  | 140.035  | -1.629 | 8.95E-25 |
| PLK1      | ENSG0000 | 3.77    | 0.765    | 1.434  | 6.79E-36 |
| PDIA3     | ENSG0000 | 370.671 | 173.452  | 1.091  | 2.37E-44 |
| PHB       | ENSG0000 | 120.25  | 54.451   | 1.129  | 2.57E-52 |
| SNRPD1    | ENSG0000 | 42.22   | 14.7     | 1.461  | 1.13E-60 |
| UGT1A6    | ENSG0000 | 70.37   | 21.275   | 1.68   | 2.54E-05 |
| IGF2      | ENSG0000 | 10.29   | 89.75    | -3.007 | 3.53E-10 |
| TBC1D16   | ENSG0000 | 5.07    | 1.81     | 1.111  | 6.32E-26 |
| RRM1      | ENSG0000 | 13.68   | 4.735    | 1.356  | 1.14E-46 |
| FN3K      | ENSG0000 | 54.059  | 25.804   | 1.039  | 7.59E-25 |
| TRAPPC2L  | ENSG0000 | 54.651  | 23.875   | 1.162  | 1.09E-53 |
| TUBA1A    | ENSG0000 | 15.45   | 6.205    | 1.191  | 8.89E-18 |
| TUBA1C    | ENSG0000 | 72.028  | 27.1     | 1.378  | 5.52E-19 |
| GPD1      | ENSG0000 | 15.39   | 46.359   | -1.531 | 1.03E-17 |
| LENG8     | ENSG0000 | 19.07   | 47.91    | -1.285 | 1.03E-05 |
| YIF1B     | ENSG0000 | 47.891  | 22.32    | 1.068  | 4.91E-35 |
| HDGFRP2   | ENSG0000 | 27.739  | 12.485   | 1.092  | 3.29E-62 |
| PLIN4     | ENSG0000 | 4.27    | 22.554   | -2.16  | 1.51E-25 |
| SLC43A2   | ENSG0000 | 4.48    | 1.57     | 1.092  | 9.52E-20 |
| TK1       | ENSG0000 | 17.25   | 2.335    | 2.452  | 2.99E-58 |
| SRRM2     | ENSG0000 | 123.442 | 265.349  | -1.098 | 9.48E-06 |
| FTH1      | ENSG0000 | 3615.3  | 1496.627 | 1.272  | 3.64E-49 |
| POLR2G    | ENSG0000 | 53.772  | 23.625   | 1.153  | 1.79E-62 |
| RPSA      | ENSG0000 | 680.38  | 312.941  | 1.118  | 2.42E-39 |
| SAC3D1    | ENSG0000 | 13.78   | 4.47     | 1.434  | 1.33E-70 |
| SCARA3    | ENSG0000 | 3.69    | 1.065    | 1.183  | 2.01E-20 |
| PBK       | ENSG0000 | 2.1     | 0.1      | 1.495  | 8.04E-41 |
| RAB4A     | ENSG0000 | 37.219  | 17.995   | 1.009  | 1.56E-41 |
| RNF187    | ENSG0000 | 55.749  | 23.695   | 1.2    | 3.40E-56 |
| NT5DC2    | ENSG0000 | 11.39   | 3.31     | 1.523  | 4.62E-26 |
| SMIM4     | ENSG0000 | 34.9    | 9.335    | 1.796  | 1.83E-59 |
| MFSD2A    | ENSG0000 | 3.81    | 77.691   | -4.032 | 5.52E-45 |
| TAP1      | ENSG0000 | 22.079  | 9.69     | 1.11   | 1.05E-22 |
| STIP1     | ENSG0000 | 52.57   | 22.525   | 1.187  | 2.85E-33 |
| FEN1      | ENSG0000 | 12.59   | 2.9      | 1.801  | 7.26E-62 |
| RNF181    | ENSG0000 | 192.417 | 83.178   | 1.2    | 5.57E-67 |
| VAMP5     | ENSG0000 | 90.88   | 33.767   | 1.402  | 1.87E-43 |
| PPIC      | ENSG0000 | 23.64   | 11.08    | 1.028  | 2.60E-31 |
| STXBP6    | ENSG0000 | 6.17    | 1.34     | 1.615  | 9.91E-40 |
| LGALS9    | ENSG0000 | 20.79   | 8.12     | 1.257  | 1.77E-17 |
| SLC25A6   | ENSG0000 | 110.063 | 52.654   | 1.05   | 5.00E-32 |
| NSMCE1    | ENSG0000 | 51.61   | 24.375   | 1.052  | 2.32E-56 |
| RP11-231C | ENSG0000 | 6.94    | 27.937   | -1.866 | 3.68E-16 |
| LMAN2     | ENSG0000 | 226.866 | 97.544   | 1.209  | 4.84E-65 |
| SLC50A1   | ENSG0000 | 65.289  | 24.135   | 1.399  | 1.38E-50 |
| NP1PB3    | ENSG0000 | 8.82    | 24.769   | -1.392 | 1.05E-07 |
| PTK2      | ENSG0000 | 22.721  | 9.61     | 1.161  | 3.37E-38 |
| SDC2      | ENSG0000 | 176.557 | 68.859   | 1.346  | 1.43E-24 |
| FAM103A1  | ENSG0000 | 15.7    | 7.285    | 1.011  | 9.60E-51 |
| SPNS1     | ENSG0000 | 31.6    | 13.335   | 1.185  | 4.26E-64 |
| FASN      | ENSG0000 | 217.896 | 108.112  | 1.004  | 2.11E-08 |
| MT1E      | ENSG0000 | 86.228  | 797.532  | -3.194 | 1.59E-32 |
| RAC3      | ENSG0000 | 14.47   | 6.25     | 1.093  | 3.17E-22 |
| ROBO1     | ENSG0000 | 9.19    | 1.07     | 2.299  | 1.09E-32 |
| MUC3A     | ENSG0000 | 1.62    | 5.13     | -1.226 | 5.18E-04 |
| TM4SF4    | ENSG0000 | 430.001 | 95.683   | 2.156  | 2.86E-18 |
| TM4SF1    | ENSG0000 | 41.469  | 14.024   | 1.499  | 5.03E-16 |

|           |          |          |          |        |          |
|-----------|----------|----------|----------|--------|----------|
| HNRNPA3   | ENSG0000 | 124.077  | 57.412   | 1.098  | 4.79E-50 |
| GLB1      | ENSG0000 | 33.079   | 15.252   | 1.068  | 3.66E-39 |
| FABP4     | ENSG0000 | 7.47     | 2.645    | 1.216  | 2.62E-10 |
| FOS       | ENSG0000 | 15.56    | 80.208   | -2.294 | 5.31E-30 |
| HSD17B13  | ENSG0000 | 6.73     | 74.827   | -3.294 | 2.68E-16 |
| PA2G4     | ENSG0000 | 52.57    | 23.56    | 1.125  | 6.70E-46 |
| NUDCD2    | ENSG0000 | 15.3     | 6.895    | 1.046  | 8.99E-32 |
| HSPA4     | ENSG0000 | 68.029   | 27.19    | 1.292  | 1.13E-52 |
| SYT9      | ENSG0000 | 0.01     | 1.26     | -1.162 | 8.39E-44 |
| GSTA4     | ENSG0000 | 18.01    | 6.855    | 1.275  | 2.86E-28 |
| TPT1-AS1  | ENSG0000 | 3.42     | 8.05     | -1.034 | 1.23E-12 |
| ZNF160    | ENSG0000 | 1.91     | 4.945    | -1.031 | 1.05E-15 |
| FPR1      | ENSG0000 | 0.53     | 2.29     | -1.105 | 7.81E-18 |
| LRG1      | ENSG0000 | 121.229  | 339.166  | -1.477 | 1.29E-15 |
| KCND3     | ENSG0000 | 0.84     | 3.235    | -1.203 | 7.35E-28 |
| KRT13     | ENSG0000 | 0        | 2.74     | -1.903 | 6.91E-36 |
| ZNF581    | ENSG0000 | 9.69     | 4.23     | 1.031  | 1.32E-44 |
| MCC       | ENSG0000 | 1.22     | 3.825    | -1.12  | 2.64E-38 |
| ETFDH     | ENSG0000 | 27.81    | 58.846   | -1.055 | 2.86E-33 |
| FGB       | ENSG0000 | 3258.516 | 6850.767 | -1.072 | 1.51E-09 |
| RP11-443f | ENSG0000 | 1.78     | 0.02     | 1.447  | 1.02E-27 |
| LGALS4    | ENSG0000 | 224.27   | 46.12    | 2.257  | 2.48E-06 |
| RHNO1     | ENSG0000 | 6.63     | 1.77     | 1.462  | 2.76E-52 |
| RRM2      | ENSG0000 | 9.26     | 0.595    | 2.685  | 1.36E-50 |
| RPS21     | ENSG0000 | 1270.692 | 486.517  | 1.383  | 9.69E-56 |
| RPS7      | ENSG0000 | 895.903  | 394.121  | 1.183  | 1.42E-54 |
| PPIH      | ENSG0000 | 16.36    | 6.63     | 1.186  | 8.15E-51 |
| QARS      | ENSG0000 | 101.447  | 45.099   | 1.152  | 6.28E-61 |
| MRPL13    | ENSG0000 | 47.431   | 19.64    | 1.23   | 8.48E-57 |
| ISG20     | ENSG0000 | 19.96    | 9.17     | 1.043  | 7.63E-16 |
| STARD5    | ENSG0000 | 6.45     | 19.359   | -1.45  | 3.13E-42 |
| TTC36     | ENSG0000 | 4        | 63.26    | -3.684 | 2.66E-42 |
| MYEOV2    | ENSG0000 | 94.693   | 41.148   | 1.183  | 1.77E-53 |
| FIBP      | ENSG0000 | 36.801   | 17.76    | 1.011  | 8.92E-57 |
| RPL38     | ENSG0000 | 1230.73  | 457.934  | 1.424  | 8.63E-66 |
| MIR4435-2 | ENSG0000 | 33.1     | 4.45     | 2.645  | 4.40E-53 |
| TRMT112   | ENSG0000 | 215.358  | 83.786   | 1.352  | 3.43E-75 |
| MTX1      | ENSG0000 | 58.838   | 20.895   | 1.45   | 1.55E-82 |
| SNCG      | ENSG0000 | 6.78     | 1.72     | 1.516  | 1.21E-23 |
| PPP1R3B   | ENSG0000 | 10.71    | 24.785   | -1.139 | 9.18E-19 |
| NAA20     | ENSG0000 | 71.858   | 29.014   | 1.279  | 1.48E-58 |
| SAA1      | ENSG0000 | 287.157  | 4468.423 | -3.955 | 3.44E-23 |
| MST1      | ENSG0000 | 205.486  | 472.132  | -1.196 | 7.93E-24 |
| SULT1B1   | ENSG0000 | 1.05     | 3.175    | -1.026 | 2.81E-14 |
| UQCRH     | ENSG0000 | 217.594  | 83.829   | 1.366  | 1.14E-57 |
| MUC13     | ENSG0000 | 5.82     | 0.22     | 2.483  | 6.99E-25 |
| TOMM20    | ENSG0000 | 65.871   | 21.944   | 1.543  | 3.13E-69 |
| SPTBN2    | ENSG0000 | 8.04     | 18.735   | -1.126 | 2.26E-16 |
| PHLDA3    | ENSG0000 | 6.77     | 2.53     | 1.138  | 4.69E-10 |
| PODN      | ENSG0000 | 1.39     | 3.865    | -1.025 | 7.70E-11 |
| EXO1      | ENSG0000 | 1.81     | 0.1      | 1.353  | 1.41E-45 |
| RPL4      | ENSG0000 | 1141.566 | 557.933  | 1.032  | 2.02E-40 |
| RPL15     | ENSG0000 | 755.139  | 377.046  | 1      | 1.90E-44 |
| HRAS      | ENSG0000 | 32.271   | 15.19    | 1.039  | 3.00E-48 |
| SEZ6L2    | ENSG0000 | 2.88     | 0.205    | 1.687  | 3.02E-23 |
| SLC22A1   | ENSG0000 | 56.102   | 495.588  | -3.12  | 2.77E-29 |
| UBE2C     | ENSG0000 | 13.24    | 0.6      | 3.154  | 1.56E-68 |
| MARCKSL1  | ENSG0000 | 29.07    | 13.709   | 1.032  | 3.51E-18 |

|           |          |          |         |        |           |
|-----------|----------|----------|---------|--------|-----------|
| PSMD2     | ENSG0000 | 81.48    | 38.55   | 1.06   | 4.01E-29  |
| PHYHD1    | ENSG0000 | 14.71    | 34.515  | -1.177 | 9.58E-19  |
| PHYKPL    | ENSG0000 | 20.569   | 47.765  | -1.177 | 1.10E-27  |
| UCP2      | ENSG0000 | 14.85    | 5.555   | 1.274  | 9.18E-13  |
| RMI2      | ENSG0000 | 3.39     | 0.47    | 1.578  | 1.38E-41  |
| RUVBL1    | ENSG0000 | 17.349   | 7.765   | 1.066  | 1.18E-37  |
| SFN       | ENSG0000 | 9.74     | 0.605   | 2.742  | 1.61E-31  |
| ETV4      | ENSG0000 | 3.97     | 0.46    | 1.767  | 9.97E-26  |
| KBTBD11   | ENSG0000 | 0.26     | 2.645   | -1.532 | 7.57E-57  |
| RNF152    | ENSG0000 | 2.87     | 7.37    | -1.113 | 7.43E-30  |
| TTY14     | ENSG0000 | 0.41     | 2.95    | -1.486 | 2.34E-05  |
| TYMS      | ENSG0000 | 16.4     | 3.05    | 2.103  | 2.21E-48  |
| TYMSOS    | ENSG0000 | 2.58     | 0.44    | 1.314  | 1.16E-36  |
| TALDO1    | ENSG0000 | 149.955  | 65.534  | 1.182  | 8.91E-51  |
| ZFAS1     | ENSG0000 | 81.002   | 27.78   | 1.511  | 7.16E-40  |
| ERICH5    | ENSG0000 | 18.92    | 3.41    | 2.175  | 1.43E-14  |
| RPLP2     | ENSG0000 | 879.597  | 343.329 | 1.355  | 2.02E-51  |
| GBA       | ENSG0000 | 73.48    | 12.61   | 2.452  | 2.46E-103 |
| POLR2L    | ENSG0000 | 155.448  | 74.78   | 1.046  | 6.25E-51  |
| SOX12     | ENSG0000 | 4.26     | 1.51    | 1.067  | 6.01E-28  |
| MAMDC4    | ENSG0000 | 2.66     | 11.405  | -1.761 | 4.27E-16  |
| RPS27     | ENSG0000 | 3269.149 | 1428.86 | 1.193  | 1.73E-47  |
| IMPDH2    | ENSG0000 | 67.662   | 29.13   | 1.188  | 2.28E-39  |
| GRAMD1C   | ENSG0000 | 2.24     | 5.925   | -1.096 | 1.36E-19  |
| STAP2     | ENSG0000 | 66.68    | 31.891  | 1.041  | 2.07E-21  |
| EXOSC4    | ENSG0000 | 41.63    | 15.195  | 1.396  | 1.23E-55  |
| RRS1      | ENSG0000 | 16       | 4.47    | 1.636  | 1.32E-34  |
| MAGED1    | ENSG0000 | 64.44    | 31.6    | 1.005  | 1.20E-12  |
| HLA-DQB1  | ENSG0000 | 22.92    | 5.189   | 1.95   | 3.59E-16  |
| LINC00174 | ENSG0000 | 1.05     | 3.635   | -1.177 | 4.56E-19  |
| SHARPIN   | ENSG0000 | 59.272   | 24.24   | 1.256  | 4.45E-61  |
| MAF1      | ENSG0000 | 56.469   | 23.51   | 1.229  | 1.43E-55  |
| TPPP2     | ENSG0000 | 0.76     | 3.525   | -1.362 | 1.01E-29  |
| PCBP1-AS  | ENSG0000 | 8.9      | 20.05   | -1.088 | 1.30E-02  |
| PUF60     | ENSG0000 | 112.259  | 47.77   | 1.216  | 3.24E-54  |
| TMEM150I  | ENSG0000 | 6.44     | 0.645   | 2.177  | 3.44E-36  |
| GREM2     | ENSG0000 | 0.93     | 6.41    | -1.941 | 4.38E-16  |
| FAM83H    | ENSG0000 | 14.96    | 5.055   | 1.398  | 1.52E-39  |
| MRPL14    | ENSG0000 | 79.71    | 35.33   | 1.152  | 9.91E-59  |
| LSMEM1    | ENSG0000 | 0.64     | 3.055   | -1.306 | 5.49E-22  |
| NQO1      | ENSG0000 | 11.72    | 1.285   | 2.477  | 2.02E-29  |
| NPM1      | ENSG0000 | 485.355  | 170.378 | 1.505  | 2.36E-47  |
| TMEM45A   | ENSG0000 | 11.38    | 32.179  | -1.422 | 4.51E-14  |
| RPL24P4   | ENSG0000 | 9.02     | 3.245   | 1.239  | 7.20E-36  |
| MRPS23    | ENSG0000 | 28.859   | 9.985   | 1.443  | 1.07E-47  |
| PHLDA2    | ENSG0000 | 4.54     | 1.015   | 1.459  | 2.33E-12  |
| SNRPE     | ENSG0000 | 137.548  | 38.494  | 1.811  | 5.11E-83  |
| RP11-69E1 | ENSG0000 | 0.83     | 3.935   | -1.431 | 4.93E-20  |
| TDRKH     | ENSG0000 | 4.09     | 1.165   | 1.233  | 1.56E-35  |
| MRPS16    | ENSG0000 | 81.452   | 35.44   | 1.178  | 4.09E-69  |
| YBEY      | ENSG0000 | 17.97    | 8.19    | 1.046  | 9.18E-35  |
| KPNA2     | ENSG0000 | 28.43    | 6.31    | 2.009  | 1.03E-62  |
| MFSD5     | ENSG0000 | 14.31    | 5.98    | 1.133  | 6.51E-58  |
| SATB1     | ENSG0000 | 1.65     | 4.965   | -1.17  | 2.49E-22  |
| SKA2      | ENSG0000 | 14.76    | 6.375   | 1.096  | 2.07E-41  |
| RPL35A    | ENSG0000 | 803.914  | 353.091 | 1.185  | 3.04E-53  |
| SLC25A18  | ENSG0000 | 21.47    | 46.775  | -1.088 | 1.48E-13  |
| HMGNA4    | ENSG0000 | 13.39    | 5.36    | 1.178  | 1.88E-18  |

|          |          |          |          |        |          |
|----------|----------|----------|----------|--------|----------|
| PYCR1    | ENSG0000 | 6.32     | 2.035    | 1.27   | 4.77E-11 |
| RABIF    | ENSG0000 | 6.21     | 2.225    | 1.161  | 5.55E-69 |
| RUVBL2   | ENSG0000 | 50.822   | 22.285   | 1.154  | 9.46E-65 |
| PLGLB1   | ENSG0000 | 29.8     | 74.586   | -1.295 | 1.09E-20 |
| TMEM50A  | ENSG0000 | 50.779   | 20.175   | 1.29   | 2.01E-54 |
| TRAIP    | ENSG0000 | 1.87     | 0.385    | 1.051  | 1.16E-40 |
| NUDT14   | ENSG0000 | 19.94    | 9.41     | 1.008  | 7.68E-22 |
| FAM3B    | ENSG0000 | 2.72     | 0.6      | 1.217  | 4.04E-11 |
| IQGAP3   | ENSG0000 | 2.35     | 0.12     | 1.581  | 4.48E-45 |
| UQCR10   | ENSG0000 | 135.532  | 66.201   | 1.023  | 7.94E-53 |
| NR2C2AP  | ENSG0000 | 14.33    | 4.33     | 1.524  | 1.09E-71 |
| IRAK1    | ENSG0000 | 36.75    | 13.79    | 1.352  | 1.22E-39 |
| RPL23AP8 | ENSG0000 | 9.59     | 4.1      | 1.054  | 1.44E-41 |
| WDR27    | ENSG0000 | 2.94     | 8.715    | -1.302 | 8.39E-10 |
| PTP4A3   | ENSG0000 | 8.63     | 2.31     | 1.541  | 1.56E-32 |
| SOCS3    | ENSG0000 | 6.84     | 20.916   | -1.483 | 7.50E-13 |
| NDUFA12  | ENSG0000 | 82.681   | 39.89    | 1.033  | 1.74E-63 |
| TMED9    | ENSG0000 | 183.304  | 91.034   | 1.002  | 6.92E-43 |
| IMMP2L   | ENSG0000 | 17.52    | 8.165    | 1.015  | 8.77E-32 |
| LCN12    | ENSG0000 | 6.83     | 17.9     | -1.271 | 7.33E-14 |
| MUC6     | ENSG0000 | 0.02     | 1.58     | -1.339 | 2.73E-09 |
| MANEAL   | ENSG0000 | 9.16     | 3.035    | 1.332  | 1.01E-29 |
| NOMO2    | ENSG0000 | 83.609   | 35.69    | 1.205  | 5.96E-48 |
| WBP5     | ENSG0000 | 20.89    | 9.55     | 1.053  | 1.10E-06 |
| UBALD2   | ENSG0000 | 27.02    | 12.254   | 1.08   | 6.24E-33 |
| IL3RA    | ENSG0000 | 2.95     | 0.6      | 1.304  | 7.64E-59 |
| SMYD3    | ENSG0000 | 13.12    | 3.06     | 1.798  | 2.36E-59 |
| PARPBP   | ENSG0000 | 1.5      | 0.19     | 1.071  | 4.70E-39 |
| OLFML2A  | ENSG0000 | 1.48     | 0.175    | 1.078  | 1.57E-41 |
| NDUFA4L2 | ENSG0000 | 14.62    | 3.17     | 1.905  | 4.81E-41 |
| NTF3     | ENSG0000 | 0.23     | 2.445    | -1.486 | 1.37E-78 |
| SLC52A2  | ENSG0000 | 14.78    | 5.38     | 1.307  | 2.94E-44 |
| NPIP4    | ENSG0000 | 4.31     | 16.34    | -1.707 | 4.23E-13 |
| NDUFA13  | ENSG0000 | 306.702  | 131.338  | 1.217  | 6.06E-60 |
| POLR3C   | ENSG0000 | 10.38    | 4.26     | 1.113  | 5.62E-43 |
| SLC51B   | ENSG0000 | 3.87     | 0.415    | 1.783  | 6.74E-27 |
| TOR3A    | ENSG0000 | 17.179   | 7.93     | 1.026  | 1.02E-27 |
| MST1P2   | ENSG0000 | 9.95     | 74.23    | -2.78  | 5.13E-30 |
| RPS23    | ENSG0000 | 1376.605 | 648.044  | 1.086  | 5.30E-45 |
| MST1L    | ENSG0000 | 10.36    | 64.444   | -2.526 | 5.43E-21 |
| MPPED1   | ENSG0000 | 1.34     | 5.769    | -1.532 | 5.30E-26 |
| TNFRSF4  | ENSG0000 | 2.97     | 0.32     | 1.589  | 4.05E-65 |
| NAP1L1   | ENSG0000 | 87.462   | 40.215   | 1.102  | 1.73E-30 |
| MT1X     | ENSG0000 | 145.29   | 1597.997 | -3.45  | 8.62E-43 |
| EPOR     | ENSG0000 | 2.57     | 7.27     | -1.212 | 1.33E-17 |
| PTMA     | ENSG0000 | 508.498  | 243.57   | 1.059  | 1.61E-41 |
| ISG15    | ENSG0000 | 71.55    | 30.819   | 1.189  | 9.07E-13 |
| HAPLN4   | ENSG0000 | 0.31     | 1.81     | -1.101 | 1.90E-25 |
| GABRD    | ENSG0000 | 1.66     | 0.06     | 1.327  | 1.49E-62 |
| HIST1H1C | ENSG0000 | 128.818  | 48.314   | 1.396  | 2.82E-24 |
| PALM3    | ENSG0000 | 7.61     | 18.025   | -1.144 | 2.18E-17 |
| TPRG1    | ENSG0000 | 1.7      | 4.69     | -1.075 | 2.30E-23 |
| MORN2    | ENSG0000 | 12.46    | 5.615    | 1.025  | 9.02E-40 |
| LAMTOR4  | ENSG0000 | 128.079  | 55.479   | 1.192  | 3.09E-57 |
| PLA2G2A  | ENSG0000 | 23.811   | 207.166  | -3.069 | 5.77E-07 |
| ZP3      | ENSG0000 | 2.71     | 0.66     | 1.16   | 1.18E-29 |
| H2AFX    | ENSG0000 | 14.94    | 4.97     | 1.417  | 8.39E-40 |
| HBA2     | ENSG0000 | 22.15    | 162.612  | -2.821 | 4.20E-38 |

|           |          |          |         |        |          |
|-----------|----------|----------|---------|--------|----------|
| CLN3      | ENSG0000 | 58.809   | 19.355  | 1.555  | 2.78E-68 |
| SUMO2     | ENSG0000 | 146.859  | 49.28   | 1.556  | 7.57E-57 |
| IDO2      | ENSG0000 | 0.11     | 2.54    | -1.673 | 3.37E-33 |
| PARVB     | ENSG0000 | 16.31    | 6.394   | 1.227  | 3.72E-13 |
| RBM34     | ENSG0000 | 44.711   | 15.919  | 1.434  | 4.00E-70 |
| PRELP     | ENSG0000 | 1.25     | 4.32    | -1.241 | 4.30E-16 |
| RPL14     | ENSG0000 | 706.917  | 314.714 | 1.165  | 1.55E-49 |
| NDUFA4    | ENSG0000 | 120.508  | 59.309  | 1.011  | 1.15E-48 |
| FAM111B   | ENSG0000 | 1.57     | 0.09    | 1.237  | 5.95E-33 |
| H1FO      | ENSG0000 | 142.438  | 60.62   | 1.219  | 4.46E-28 |
| HN1       | ENSG0000 | 64.208   | 19.065  | 1.7    | 8.00E-54 |
| S100A13   | ENSG0000 | 75.29    | 27.839  | 1.403  | 6.17E-19 |
| FHIT      | ENSG0000 | 11.09    | 4.22    | 1.212  | 4.78E-39 |
| FAM150B   | ENSG0000 | 0.13     | 1.28    | -1.013 | 5.92E-11 |
| FAM180A   | ENSG0000 | 0.22     | 3.43    | -1.86  | 4.66E-57 |
| KAZN      | ENSG0000 | 0.34     | 1.91    | -1.119 | 1.53E-33 |
| IL1RAP    | ENSG0000 | 6.41     | 25.615  | -1.845 | 5.13E-43 |
| KIAA0895L | ENSG0000 | 2.04     | 7.16    | -1.424 | 1.66E-10 |
| HLA-DRB1  | ENSG0000 | 66.431   | 27.555  | 1.24   | 4.58E-10 |
| SERPINA3  | ENSG0000 | 370.748  | 888.913 | -1.259 | 9.53E-13 |
| S100A4    | ENSG0000 | 29.25    | 13.083  | 1.103  | 9.94E-12 |
| HRCT1     | ENSG0000 | 4.34     | 0.48    | 1.851  | 2.27E-36 |
| TUBB      | ENSG0000 | 207.015  | 88.763  | 1.212  | 3.10E-32 |
| PPIA      | ENSG0000 | 1363.405 | 530.68  | 1.36   | 1.65E-75 |
| EVL       | ENSG0000 | 25.86    | 54.749  | -1.054 | 8.84E-15 |
| XRCC6     | ENSG0000 | 110.598  | 53.725  | 1.028  | 4.22E-48 |
| ZNF775    | ENSG0000 | 8.49     | 3.35    | 1.125  | 1.01E-34 |
| MYL6B     | ENSG0000 | 27.219   | 9.079   | 1.485  | 1.42E-52 |
| NACA      | ENSG0000 | 953.903  | 425.79  | 1.162  | 3.21E-62 |
| MME       | ENSG0000 | 0.91     | 7.135   | -2.091 | 2.01E-06 |
| LINC0023E | ENSG0000 | 0.19     | 3.295   | -1.852 | 2.37E-34 |
| TOMM7     | ENSG0000 | 327.397  | 128.181 | 1.346  | 3.43E-57 |
| PDXDC2P   | ENSG0000 | 2.91     | 11.375  | -1.662 | 3.44E-20 |
| HLA-DQA   | ENSG0000 | 12.49    | 3.505   | 1.582  | 1.17E-09 |
| GM2A      | ENSG0000 | 16       | 4.965   | 1.511  | 1.23E-64 |
| ZNF585A   | ENSG0000 | 5.72     | 2.155   | 1.091  | 7.45E-34 |
| LAGE3     | ENSG0000 | 36.59    | 11.005  | 1.647  | 2.33E-67 |
| FAM163B   | ENSG0000 | 0.09     | 2.415   | -1.648 | 2.16E-47 |
| SRC       | ENSG0000 | 8.85     | 3.365   | 1.174  | 1.05E-12 |
| SND1      | ENSG0000 | 82.521   | 38.05   | 1.097  | 2.44E-57 |
| MRPL21    | ENSG0000 | 61.23    | 29.245  | 1.041  | 5.43E-45 |
| OGDHL     | ENSG0000 | 18.45    | 41.286  | -1.12  | 1.77E-17 |
| PDGFA     | ENSG0000 | 9.08     | 1.965   | 1.765  | 1.02E-27 |
| NMB       | ENSG0000 | 3.43     | 0.835   | 1.272  | 8.27E-32 |
| S100A10   | ENSG0000 | 241.168  | 54.345  | 2.129  | 2.01E-41 |
| RPL37A    | ENSG0000 | 2021.064 | 985.047 | 1.036  | 9.48E-37 |
| GPAA1     | ENSG0000 | 115.511  | 39.639  | 1.52   | 7.85E-66 |
| UGT2B17   | ENSG0000 | 0.75     | 3.04    | -1.207 | 1.79E-03 |
| HIST1H2B1 | ENSG0000 | 106.042  | 36.82   | 1.501  | 4.03E-23 |
| S100A6    | ENSG0000 | 69.07    | 28.38   | 1.254  | 2.49E-12 |
| RPL12     | ENSG0000 | 922.752  | 451.379 | 1.03   | 9.95E-36 |
| MPZL1     | ENSG0000 | 21.41    | 8.445   | 1.247  | 1.17E-30 |
| RPS4X     | ENSG0000 | 486.365  | 194.576 | 1.317  | 6.51E-48 |
| GRK6      | ENSG0000 | 10.62    | 4.71    | 1.025  | 1.04E-47 |
| PRIM1     | ENSG0000 | 5.97     | 1.56    | 1.445  | 1.73E-42 |
| RP11-347C | ENSG0000 | 0.37     | 1.89    | -1.077 | 4.93E-25 |
| ZNF544    | ENSG0000 | 9.53     | 3.565   | 1.206  | 2.66E-35 |
| SULT1C2   | ENSG0000 | 4.09     | 0.35    | 1.915  | 3.66E-19 |

|          |          |          |          |        |          |
|----------|----------|----------|----------|--------|----------|
| RPL23A   | ENSG0000 | 690.213  | 342.33   | 1.01   | 5.01E-38 |
| UBL5     | ENSG0000 | 409.522  | 183.329  | 1.155  | 1.28E-70 |
| MT1F     | ENSG0000 | 7        | 191.386  | -4.588 | 6.81E-49 |
| TXNRD1   | ENSG0000 | 30.751   | 11.718   | 1.32   | 1.14E-22 |
| FLVCR1-A | ENSG0000 | 2.93     | 0.71     | 1.201  | 1.73E-32 |
| HLA-DRB5 | ENSG0000 | 14.2     | 5.88     | 1.144  | 1.50E-05 |
| ZNF28    | ENSG0000 | 3.54     | 0.65     | 1.46   | 1.30E-20 |
| PPIAP22  | ENSG0000 | 165.466  | 34.006   | 2.25   | 9.13E-79 |
| STK39    | ENSG0000 | 2.72     | 0.525    | 1.286  | 7.44E-24 |
| TAT      | ENSG0000 | 98.25    | 345.525  | -1.804 | 4.06E-16 |
| LPA      | ENSG0000 | 1.21     | 8.365    | -2.083 | 6.63E-44 |
| MT-CO2   | ENSG0000 | 13276.62 | 27014.57 | -1.025 | 1.28E-24 |
| GLMP     | ENSG0000 | 123.023  | 36.071   | 1.742  | 4.49E-67 |
| MT-CYB   | ENSG0000 | 6751.535 | 15334.04 | -1.183 | 2.38E-28 |
| F5       | ENSG0000 | 206.614  | 92.446   | 1.152  | 8.08E-13 |
| EPS8L3   | ENSG0000 | 4.76     | 0.13     | 2.35   | 2.06E-30 |
| MT-ND2   | ENSG0000 | 6531.958 | 14680.36 | -1.168 | 2.13E-23 |
| MT-ND5   | ENSG0000 | 1410.997 | 3065.91  | -1.119 | 9.28E-17 |
| SCAMP5   | ENSG0000 | 3.87     | 0.69     | 1.527  | 2.60E-24 |
| HMG2     | ENSG0000 | 225.736  | 103.877  | 1.112  | 3.38E-42 |
| SELM     | ENSG0000 | 33.981   | 12.185   | 1.408  | 9.10E-14 |
| MT-ND3   | ENSG0000 | 9254.247 | 19245.72 | -1.056 | 5.56E-24 |
| TSEN15   | ENSG0000 | 11.54    | 5.17     | 1.023  | 1.19E-41 |
| MT-ND4   | ENSG0000 | 9684.084 | 23104.72 | -1.254 | 1.08E-34 |
| MT-ND1   | ENSG0000 | 5574.782 | 11534.36 | -1.049 | 3.52E-24 |
| SHISA4   | ENSG0000 | 11.06    | 3.83     | 1.32   | 1.95E-21 |
| MT-ATP6  | ENSG0000 | 11214.67 | 31942.73 | -1.51  | 1.16E-41 |
| PRC1     | ENSG0000 | 10.68    | 1.12     | 2.462  | 3.32E-64 |
| RPL39    | ENSG0000 | 1924.809 | 846.93   | 1.183  | 1.93E-44 |
| SOWAHA   | ENSG0000 | 2.79     | 0.565    | 1.276  | 1.14E-34 |
| MFAP3L   | ENSG0000 | 1.98     | 7.005    | -1.426 | 9.41E-28 |
| TGM2     | ENSG0000 | 49.931   | 107.727  | -1.094 | 3.91E-12 |
| RNU4-1   | ENSG0000 | 2.49     | 0        | 1.803  | 8.85E-02 |
| RNU4-2   | ENSG0000 | 13.67    | 5.598    | 1.153  | 5.34E-06 |
| TATDN3   | ENSG0000 | 7.83     | 3.265    | 1.05   | 3.12E-45 |
| SAMD5    | ENSG0000 | 0.48     | 2.47     | -1.229 | 5.79E-26 |
| SOX18    | ENSG0000 | 4.61     | 1.78     | 1.013  | 5.70E-29 |
| FAM127B  | ENSG0000 | 33.109   | 15.435   | 1.053  | 8.59E-12 |
| NEU4     | ENSG0000 | 9.57     | 24.385   | -1.264 | 4.71E-12 |
| GGTA1P   | ENSG0000 | 3.88     | 1.105    | 1.213  | 7.57E-28 |
| PFDN6    | ENSG0000 | 118.569  | 41.236   | 1.501  | 1.97E-73 |
| HNRNPCP  | ENSG0000 | 7.96     | 0.895    | 2.241  | 1.00E-63 |
| HLA-DMA  | ENSG0000 | 37.32    | 12.255   | 1.532  | 1.92E-20 |
| TAP2     | ENSG0000 | 17.289   | 7.24     | 1.15   | 1.36E-20 |
| HLA-DRA  | ENSG0000 | 171.468  | 42.669   | 1.982  | 3.47E-16 |
| FKBPL    | ENSG0000 | 5.26     | 2.025    | 1.049  | 4.76E-60 |
| NELFE    | ENSG0000 | 58.618   | 14.75    | 1.92   | 4.92E-73 |
| NEU1     | ENSG0000 | 55.299   | 15.57    | 1.765  | 3.02E-68 |
| LSM2     | ENSG0000 | 38.869   | 13.895   | 1.42   | 2.80E-64 |
| VARS     | ENSG0000 | 36.521   | 13.985   | 1.324  | 3.20E-47 |
| GPANK1   | ENSG0000 | 16.02    | 6.145    | 1.252  | 4.25E-59 |
| NFKBIL1  | ENSG0000 | 18.87    | 8.68     | 1.038  | 1.09E-51 |
| HLA-C    | ENSG0000 | 499.658  | 223.828  | 1.155  | 7.73E-16 |
| LRCOL1   | ENSG0000 | 1.04     | 7.855    | -2.118 | 2.13E-29 |
| TRIM31   | ENSG0000 | 2.55     | 0.295    | 1.455  | 7.90E-21 |
| PPP1R11  | ENSG0000 | 42.579   | 19.67    | 1.076  | 8.00E-46 |
| GNB2L1   | ENSG0000 | 891.937  | 427.994  | 1.058  | 4.11E-47 |
| HLA-F    | ENSG0000 | 95.709   | 30.939   | 1.598  | 5.53E-21 |



|           |          |          |          |        |          |
|-----------|----------|----------|----------|--------|----------|
| GABBR1    | ENSG0000 | 0.68     | 2.665    | -1.125 | 3.18E-12 |
| ST8SIA6-A | ENSG0000 | 3.81     | 0        | 2.266  | 2.87E-27 |
| FAM83A-7  | ENSG0000 | 0.45     | 4.95     | -2.037 | 2.15E-08 |
| PRSS1     | ENSG0000 | 0        | 1.17     | -1.118 | 6.84E-25 |
| PSENN     | ENSG0000 | 80.968   | 34.785   | 1.196  | 1.95E-59 |
| PSMB10    | ENSG0000 | 59.112   | 28.645   | 1.02   | 1.14E-29 |
| KRT17P4   | ENSG0000 | 0.05     | 1.34     | -1.156 | 1.80E-35 |
| MT1H      | ENSG0000 | 2.16     | 332.67   | -6.722 | 2.39E-61 |
| MT1DP     | ENSG0000 | 0.59     | 4.235    | -1.719 | 2.76E-18 |
| MT1A      | ENSG0000 | 15.19    | 81.693   | -2.353 | 1.74E-18 |
| MT1M      | ENSG0000 | 1.78     | 112.018  | -5.345 | 8.93E-60 |
| EXOC3L4   | ENSG0000 | 17.59    | 43.365   | -1.255 | 2.97E-16 |
| SERF1B    | ENSG0000 | 18.65    | 6.19     | 1.45   | 1.62E-60 |
| HMG1      | ENSG0000 | 69.42    | 32.281   | 1.081  | 3.30E-36 |
| LCMT1     | ENSG0000 | 12.62    | 5.335    | 1.104  | 5.15E-53 |
| SMIM11    | ENSG0000 | 4.77     | 1.32     | 1.314  | 3.18E-14 |
| FAM99B    | ENSG0000 | 0.23     | 3.835    | -1.975 | 1.97E-44 |
| FAM99A    | ENSG0000 | 1.1      | 37.31    | -4.189 | 1.13E-52 |
| HBA1      | ENSG0000 | 10       | 98.975   | -3.184 | 2.99E-47 |
| HLA-H     | ENSG0000 | 36.931   | 6.175    | 2.402  | 1.66E-34 |
| HLA-A     | ENSG0000 | 714.504  | 165.214  | 2.106  | 3.22E-46 |
| IGKC      | ENSG0000 | 145.713  | 295.005  | -1.013 | 2.58E-03 |
| IGKV4-1   | ENSG0000 | 1.76     | 6.825    | -1.503 | 1.78E-02 |
| IGLV1-51  | ENSG0000 | 1.47     | 5.9      | -1.482 | 1.29E-04 |
| IGLV1-47  | ENSG0000 | 1.11     | 3.538    | -1.105 | 5.66E-02 |
| IGLV1-44  | ENSG0000 | 1.35     | 3.99     | -1.086 | 7.36E-02 |
| IGLV1-40  | ENSG0000 | 1.33     | 6.649    | -1.715 | 1.26E-03 |
| IGLV3-25  | ENSG0000 | 0.84     | 3.975    | -1.435 | 9.68E-04 |
| IGLV3-19  | ENSG0000 | 1.17     | 3.615    | -1.089 | 4.90E-02 |
| IGLV2-14  | ENSG0000 | 2.14     | 11.483   | -1.991 | 2.77E-06 |
| IGLV2-11  | ENSG0000 | 1.12     | 4.605    | -1.403 | 9.43E-05 |
| IGLC2     | ENSG0000 | 39.769   | 93.769   | -1.217 | 5.45E-03 |
| IGLC3     | ENSG0000 | 24.69    | 52.18    | -1.05  | 1.49E-03 |
| TRBC2     | ENSG0000 | 11.13    | 5.035    | 1.007  | 3.92E-09 |
| IGHA2     | ENSG0000 | 2.83     | 10.167   | -1.544 | 5.71E-12 |
| IGHG4     | ENSG0000 | 4.9      | 13.65    | -1.312 | 2.88E-03 |
| IGHG2     | ENSG0000 | 10.09    | 28.674   | -1.42  | 3.72E-04 |
| IGHA1     | ENSG0000 | 21.08    | 103.5    | -2.243 | 3.01E-16 |
| IGHM      | ENSG0000 | 8.76     | 27.634   | -1.553 | 1.81E-10 |
| IGHV2-5   | ENSG0000 | 0.23     | 1.725    | -1.148 | 3.21E-04 |
| IGHV3-15  | ENSG0000 | 0.45     | 1.995    | -1.046 | 6.26E-03 |
| IGHV3-33  | ENSG0000 | 0.74     | 2.745    | -1.106 | 4.21E-03 |
| IGHV5-51  | ENSG0000 | 0.64     | 2.455    | -1.075 | 1.92E-03 |
| RPL15P3   | ENSG0000 | 8.69     | 3.015    | 1.271  | 6.17E-38 |
| MT-ND4L   | ENSG0000 | 5341.391 | 15483.03 | -1.535 | 6.04E-27 |
| LPAL2     | ENSG0000 | 1.31     | 6.39     | -1.678 | 4.47E-39 |
| RP11-6411 | ENSG0000 | 174.126  | 60.058   | 1.52   | 2.02E-49 |
| SUPT4H1   | ENSG0000 | 66.192   | 30.304   | 1.102  | 4.01E-58 |
| GSTM2     | ENSG0000 | 4.74     | 20.76    | -1.923 | 4.67E-22 |
| LCAT      | ENSG0000 | 32.421   | 153.649  | -2.21  | 2.18E-42 |
| GBP7      | ENSG0000 | 6.71     | 14.798   | -1.035 | 7.89E-07 |
| RPLP0P6   | ENSG0000 | 13.89    | 4.415    | 1.459  | 7.08E-44 |
| SLX1A-SU  | ENSG0000 | 2.04     | 6.45     | -1.293 | 6.72E-12 |
| HEXA      | ENSG0000 | 76.68    | 33.93    | 1.153  | 2.55E-44 |
| SLC35F6   | ENSG0000 | 16.66    | 7.18     | 1.11   | 4.73E-44 |
| UGT2B11   | ENSG0000 | 3.8      | 0.615    | 1.572  | 4.59E-20 |
| UBD       | ENSG0000 | 334.949  | 7.468    | 5.31   | 1.60E-66 |
| LTB4R     | ENSG0000 | 2.01     | 5.365    | -1.08  | 3.40E-08 |

|           |          |          |          |        |          |
|-----------|----------|----------|----------|--------|----------|
| TAX1BP3   | ENSG0000 | 26.981   | 11.99    | 1.107  | 2.37E-17 |
| TSPAN4    | ENSG0000 | 40.52    | 18.425   | 1.096  | 2.62E-21 |
| LYRM4     | ENSG0000 | 16       | 6.435    | 1.193  | 1.35E-52 |
| PTMAP5    | ENSG0000 | 2.79     | 0.765    | 1.103  | 9.23E-26 |
| PLIN5     | ENSG0000 | 18.75    | 68.379   | -1.813 | 8.12E-20 |
| RPL7P1    | ENSG0000 | 20.549   | 5        | 1.845  | 1.49E-45 |
| MEG3      | ENSG0000 | 2.21     | 22.203   | -2.854 | 6.21E-17 |
| TOMM6     | ENSG0000 | 230.017  | 86.413   | 1.402  | 1.25E-72 |
| RP11-480I | ENSG0000 | 3.39     | 0.955    | 1.167  | 3.16E-25 |
| GOLGA8B   | ENSG0000 | 7.7      | 19.393   | -1.229 | 3.83E-03 |
| GCGR      | ENSG0000 | 4.47     | 57.661   | -3.423 | 2.38E-39 |
| TSTD1     | ENSG0000 | 79.181   | 35.715   | 1.127  | 6.37E-20 |
| IFI30     | ENSG0000 | 140.769  | 51.639   | 1.429  | 1.31E-30 |
| RPS2P55   | ENSG0000 | 2.26     | 0.33     | 1.293  | 2.92E-51 |
| RP11-475C | ENSG0000 | 15.42    | 7.145    | 1.011  | 2.34E-28 |
| FTH1P8    | ENSG0000 | 9.88     | 1.33     | 2.223  | 4.15E-60 |
| RP11-40C  | ENSG0000 | 389.91   | 0        | 8.611  | 3.30E-78 |
| TRIM16    | ENSG0000 | 6.27     | 2.35     | 1.118  | 7.03E-22 |
| HEPN1     | ENSG0000 | 0.21     | 5.295    | -2.379 | 5.40E-09 |
| UBA52     | ENSG0000 | 852.821  | 414.275  | 1.04   | 8.44E-57 |
| TIAF1     | ENSG0000 | 0.48     | 2.72     | -1.33  | 2.07E-39 |
| LINC00152 | ENSG0000 | 35.26    | 4.54     | 2.711  | 1.71E-59 |
| RP11-632I | ENSG0000 | 1.68     | 5.815    | -1.346 | 2.31E-26 |
| HLA-DPB1  | ENSG0000 | 59.821   | 17.4     | 1.725  | 2.74E-14 |
| UBE2SP2   | ENSG0000 | 3.54     | 0.085    | 2.065  | 3.79E-71 |
| SNRPGP15  | ENSG0000 | 0.25     | 1.765    | -1.145 | 4.66E-19 |
| HNRNPA1   | ENSG0000 | 7.86     | 3.015    | 1.142  | 1.06E-33 |
| RP11-51O  | ENSG0000 | 21.64    | 8.325    | 1.28   | 1.06E-44 |
| SH3BP5-A  | ENSG0000 | 0.9      | 3.05     | -1.092 | 1.24E-18 |
| RP11-228F | ENSG0000 | 0.38     | 2.354    | -1.281 | 1.39E-25 |
| RP11-415J | ENSG0000 | 0.74     | 3.8      | -1.464 | 3.31E-31 |
| RP11-390F | ENSG0000 | 1.26     | 4.439    | -1.267 | 5.45E-28 |
| RPL35P5   | ENSG0000 | 5.17     | 1.38     | 1.374  | 7.81E-45 |
| MTND2P2   | ENSG0000 | 211.541  | 441.922  | -1.059 | 2.46E-12 |
| FAM195B   | ENSG0000 | 68.721   | 30.14    | 1.163  | 3.78E-40 |
| FAM229A   | ENSG0000 | 1.52     | 4.93     | -1.235 | 6.43E-12 |
| RP11-384I | ENSG0000 | 1.46     | 4.205    | -1.081 | 2.87E-23 |
| NOL7      | ENSG0000 | 38.55    | 15.44    | 1.266  | 1.50E-59 |
| RP4-706A  | ENSG0000 | 22.42    | 9.355    | 1.177  | 2.60E-30 |
| RP11-419C | ENSG0000 | 2.46     | 11.16    | -1.813 | 2.07E-18 |
| RP11-61N  | ENSG0000 | 6.12     | 1.49     | 1.516  | 1.21E-19 |
| FTH1P20   | ENSG0000 | 13.07    | 1.48     | 2.504  | 1.81E-84 |
| RPL39P40  | ENSG0000 | 1.67     | 0        | 1.417  | 4.39E-02 |
| RP11-128I | ENSG0000 | 1.61     | 0.24     | 1.074  | 4.26E-37 |
| TBCAP1    | ENSG0000 | 1.64     | 0.26     | 1.067  | 8.15E-27 |
| RP3-417G  | ENSG0000 | 2.94     | 0.94     | 1.022  | 5.27E-29 |
| LINC00511 | ENSG0000 | 1.86     | 0.105    | 1.372  | 2.19E-23 |
| RPS28P7   | ENSG0000 | 722.222  | 182.518  | 1.979  | 1.96E-74 |
| WASH7P    | ENSG0000 | 1.2      | 4.41     | -1.298 | 1.11E-15 |
| HPN-AS1   | ENSG0000 | 0.59     | 3.69     | -1.561 | 1.59E-26 |
| LTB       | ENSG0000 | 7.99     | 2.18     | 1.499  | 1.25E-15 |
| SPAG5-AS  | ENSG0000 | 0.5      | 2.125    | -1.059 | 1.73E-24 |
| RP11-452F | ENSG0000 | 11.78    | 4.12     | 1.32   | 1.81E-47 |
| MT-ATP8   | ENSG0000 | 11020.48 | 37358.53 | -1.761 | 1.62E-29 |
| LINC0132C | ENSG0000 | 0.46     | 2.05     | -1.063 | 1.73E-09 |
| ORM2      | ENSG0000 | 1430.198 | 3502.573 | -1.292 | 8.12E-14 |
| OST4      | ENSG0000 | 273.879  | 129.4    | 1.076  | 7.70E-69 |
| RP3-342P  | ENSG0000 | 0.1      | 3.96     | -2.173 | 5.87E-47 |

|           |          |          |          |        |          |
|-----------|----------|----------|----------|--------|----------|
| RP1-241P  | ENSG0000 | 3.77     | 0.74     | 1.455  | 9.14E-15 |
| SPCS2P4   | ENSG0000 | 30.96    | 12.14    | 1.282  | 2.97E-41 |
| RP11-556f | ENSG0000 | 1.14     | 0        | 1.098  | 1.21E-22 |
| LINC0065c | ENSG0000 | 1.39     | 4.703    | -1.255 | 2.20E-14 |
| PGA4      | ENSG0000 | 0.05     | 1.7      | -1.362 | 3.57E-43 |
| MT1P3     | ENSG0000 | 0        | 1.41     | -1.269 | 1.22E-09 |
| HMG1N1P3  | ENSG0000 | 1.59     | 0        | 1.373  | 5.96E-38 |
| ORM1      | ENSG0000 | 4575.773 | 15121.36 | -1.724 | 3.35E-19 |
| HLA-DRBf  | ENSG0000 | 4.28     | 0.965    | 1.426  | 1.57E-14 |
| PET100    | ENSG0000 | 68.322   | 29.18    | 1.2    | 8.36E-63 |
| PGA3      | ENSG0000 | 0.06     | 2.469    | -1.71  | 8.52E-49 |
| GOLGA6L5  | ENSG0000 | 0.93     | 3.465    | -1.21  | 1.80E-18 |
| RP4-631H  | ENSG0000 | 0        | 1.5      | -1.322 | 1.76E-07 |
| HLA-DPA1  | ENSG0000 | 49.969   | 17.045   | 1.498  | 2.45E-11 |
| RPS18     | ENSG0000 | 2144.461 | 874.278  | 1.293  | 5.72E-48 |
| FTH1P7    | ENSG0000 | 25.5     | 2.38     | 2.971  | 2.02E-72 |
| GOLGA8N   | ENSG0000 | 1.07     | 3.665    | -1.172 | 2.69E-20 |
| LINC00665 | ENSG0000 | 2.16     | 0.485    | 1.089  | 3.09E-18 |
| GTF2IP4   | ENSG0000 | 23.86    | 8.225    | 1.43   | 1.57E-28 |
| MTND4P2   | ENSG0000 | 4        | 25.358   | -2.398 | 3.83E-27 |
| RP11-295k | ENSG0000 | 20.34    | 5.555    | 1.703  | 9.96E-37 |
| MT1XP1    | ENSG0000 | 0        | 2.03     | -1.599 | 2.90E-28 |
| RP11-250f | ENSG0000 | 0.5      | 2.48     | -1.214 | 3.11E-40 |
| H2BFS     | ENSG0000 | 7.35     | 2.365    | 1.311  | 1.07E-27 |
| MAGI2-AS  | ENSG0000 | 1.53     | 8.76     | -1.948 | 1.65E-24 |
| HMG1N2P5  | ENSG0000 | 42.659   | 13.404   | 1.6    | 2.32E-34 |
| RP11-465f | ENSG0000 | 4.77     | 1.63     | 1.134  | 3.17E-22 |
| RP11-166f | ENSG0000 | 0.87     | 3.453    | -1.252 | 1.57E-17 |
| GAS5      | ENSG0000 | 169.388  | 80.573   | 1.063  | 1.93E-27 |
| HLA-B     | ENSG0000 | 788.298  | 281.004  | 1.485  | 1.15E-16 |
| RPS3AP6   | ENSG0000 | 12.82    | 5.885    | 1.005  | 1.09E-27 |
| RPL23AP4  | ENSG0000 | 644.751  | 238.359  | 1.432  | 1.41E-52 |
| SOX9-AS1  | ENSG0000 | 2.87     | 0.72     | 1.17   | 9.13E-19 |
| FABP5P7   | ENSG0000 | 8.22     | 1.645    | 1.801  | 1.41E-32 |
| TECRP1    | ENSG0000 | 6.04     | 1.785    | 1.338  | 4.63E-39 |
| HGH1      | ENSG0000 | 22.409   | 10.215   | 1.062  | 1.99E-38 |
| RPL39P3   | ENSG0000 | 319.151  | 110.798  | 1.518  | 2.15E-18 |
| RP4-763G  | ENSG0000 | 5.4      | 19.574   | -1.685 | 9.76E-20 |
| SUMO2P1   | ENSG0000 | 1.16     | 0        | 1.111  | 1.18E-06 |
| FAM103A2  | ENSG0000 | 6.95     | 2.265    | 1.284  | 2.92E-28 |
| RP11-575l | ENSG0000 | 0.44     | 2.52     | -1.289 | 9.72E-23 |
| SNRPGP1C  | ENSG0000 | 1.81     | 5.694    | -1.252 | 3.22E-15 |
| TOPORS-7  | ENSG0000 | 9.65     | 3.685    | 1.185  | 1.22E-48 |
| RPL6P27   | ENSG0000 | 12.27    | 4.93     | 1.162  | 9.28E-36 |
| H3F3AP4   | ENSG0000 | 144.256  | 34.374   | 2.038  | 4.70E-16 |
| PNMA6A    | ENSG0000 | 9.82     | 4.305    | 1.028  | 2.33E-07 |
| RP11-2157 | ENSG0000 | 2.32     | 0.17     | 1.505  | 1.69E-56 |
| HSPB1P1   | ENSG0000 | 5.31     | 0        | 2.658  | 1.66E-49 |
| RP11-175f | ENSG0000 | 1.41     | 4.86     | -1.282 | 6.52E-12 |
| RPL13AP5  | ENSG0000 | 68.802   | 31.064   | 1.122  | 1.31E-37 |
| PITPNA-A  | ENSG0000 | 8.52     | 3.245    | 1.165  | 5.67E-37 |
| LINC0010f | ENSG0000 | 0.56     | 2.26     | -1.063 | 1.09E-12 |
| LINC01554 | ENSG0000 | 1.42     | 69.249   | -4.859 | 4.99E-26 |
| NDUFA6-7  | ENSG0000 | 5.28     | 12.819   | -1.138 | 9.18E-15 |
| RP4-669L1 | ENSG0000 | 3.09     | 8.316    | -1.188 | 1.19E-09 |
| HAND2-A   | ENSG0000 | 0.12     | 2.285    | -1.552 | 3.44E-58 |
| HLA-DQA   | ENSG0000 | 2.19     | 0.425    | 1.163  | 1.62E-08 |
| UBE2Q2P6  | ENSG0000 | 655.975  | 307.128  | 1.092  | 1.39E-15 |

|           |          |         |         |        |          |
|-----------|----------|---------|---------|--------|----------|
| KIFC1     | ENSG0000 | 4.37    | 0.205   | 2.156  | 2.31E-55 |
| LINC0137C | ENSG0000 | 0.53    | 6.555   | -2.304 | 1.99E-14 |
| LINC00844 | ENSG0000 | 5.59    | 37.984  | -2.565 | 5.09E-17 |
| PTENP1    | ENSG0000 | 1.98    | 0.39    | 1.1    | 5.57E-32 |
| OR2I1P    | ENSG0000 | 25.71   | 1.305   | 3.535  | 2.25E-34 |
| SCARNA12  | ENSG0000 | 0.37    | 1.865   | -1.064 | 5.67E-19 |
| RP11-464I | ENSG0000 | 2.61    | 0.35    | 1.419  | 1.55E-43 |
| RP11-295F | ENSG0000 | 3.58    | 10.585  | -1.339 | 6.20E-08 |
| NME1      | ENSG0000 | 100.099 | 29.344  | 1.736  | 3.98E-60 |
| MRPS17    | ENSG0000 | 16.48   | 7.29    | 1.076  | 5.73E-45 |
| ITIH4-AS1 | ENSG0000 | 0.58    | 3.97    | -1.653 | 4.22E-33 |
| IGKV3-20  | ENSG0000 | 6.35    | 17.302  | -1.316 | 2.63E-03 |
| LY6G5B    | ENSG0000 | 1.49    | 4.07    | -1.026 | 3.60E-05 |
| PSMB9     | ENSG0000 | 50.011  | 17.194  | 1.487  | 6.35E-29 |
| RP11-499F | ENSG0000 | 2.1     | 7.765   | -1.499 | 3.20E-16 |
| IGKV1-17  | ENSG0000 | 0.59    | 2.365   | -1.082 | 1.24E-02 |
| PLGLA     | ENSG0000 | 4.32    | 22.95   | -2.171 | 6.68E-46 |
| FLJ22763  | ENSG0000 | 0.76    | 6.25    | -2.042 | 3.65E-27 |
| IGKV2-24  | ENSG0000 | 0.37    | 2.074   | -1.166 | 5.29E-08 |
| RPL36A    | ENSG0000 | 883.691 | 296.337 | 1.573  | 5.82E-59 |
| IGKV3-11  | ENSG0000 | 8.89    | 19.145  | -1.026 | 2.15E-03 |
| RPP21     | ENSG0000 | 44.901  | 18.17   | 1.26   | 2.39E-62 |
| RPL37P6   | ENSG0000 | 2.03    | 0       | 1.599  | 8.18E-40 |
| PSMC1P1   | ENSG0000 | 13.25   | 5.405   | 1.154  | 3.47E-19 |
| INMT      | ENSG0000 | 1.57    | 7.73    | -1.764 | 6.84E-36 |
| IGKV1-9   | ENSG0000 | 0.57    | 2.357   | -1.097 | 1.74E-03 |
| HOGA1     | ENSG0000 | 7.79    | 21.02   | -1.325 | 6.56E-23 |
| PRR34-AS  | ENSG0000 | 7.78    | 3.39    | 1      | 3.51E-24 |
| IGKV1-33  | ENSG0000 | 1.17    | 5.51    | -1.585 | 1.25E-03 |
| LINC00965 | ENSG0000 | 15.97   | 33.294  | -1.015 | 1.63E-03 |
| PEG10     | ENSG0000 | 5.21    | 0.71    | 1.861  | 3.12E-13 |
| STAG3L5P  | ENSG0000 | 5.22    | 13.125  | -1.183 | 5.08E-08 |
| UGT1A10   | ENSG0000 | 1.21    | 0.1     | 1.007  | 4.13E-17 |
| HLA-DMB   | ENSG0000 | 14.22   | 4.74    | 1.407  | 5.56E-17 |
| MBL1P     | ENSG0000 | 0.22    | 3.06    | -1.735 | 3.31E-49 |
| FTH1P23   | ENSG0000 | 2.4     | 0.63    | 1.061  | 2.57E-49 |
| IGKV1-5   | ENSG0000 | 1.45    | 5.679   | -1.447 | 3.65E-03 |
| NME1-NM   | ENSG0000 | 398.434 | 162.714 | 1.287  | 1.52E-54 |
| RP11-274F | ENSG0000 | 4.96    | 12.679  | -1.199 | 4.58E-10 |
| RP11-6B4  | ENSG0000 | 0.17    | 4.765   | -2.301 | 2.21E-48 |
| RP5-966M  | ENSG0000 | 6.86    | 66.16   | -3.095 | 4.32E-35 |
| PLA2G4B   | ENSG0000 | 1.46    | 4.7     | -1.212 | 7.46E-13 |
| NP1PB5    | ENSG0000 | 9.71    | 48.205  | -2.2   | 8.53E-16 |
| RPS12P21  | ENSG0000 | 0.07    | 1.17    | -1.02  | 2.74E-46 |
| RPL23AP6  | ENSG0000 | 2.83    | 0.525   | 1.329  | 2.76E-26 |
| RP11-404C | ENSG0000 | 0.35    | 2.57    | -1.403 | 1.16E-22 |
| IGKV2-28  | ENSG0000 | 2.52    | 8.89    | -1.49  | 2.38E-04 |
| IFITM10   | ENSG0000 | 1.82    | 8.635   | -1.773 | 3.62E-14 |
| XXbac-BP  | ENSG0000 | 5.75    | 1.324   | 1.538  | 9.66E-05 |
| LINC01296 | ENSG0000 | 2.28    | 0.15    | 1.512  | 2.92E-34 |
| IGKV3-15  | ENSG0000 | 1.61    | 5.659   | -1.351 | 1.39E-02 |
| RP11-10G  | ENSG0000 | 2.99    | 0       | 1.996  | 3.34E-66 |
| IGKV1-27  | ENSG0000 | 0.4     | 1.94    | -1.07  | 5.39E-03 |
| HBB       | ENSG0000 | 15.86   | 167.277 | -3.319 | 2.55E-49 |
| NEAT1     | ENSG0000 | 124.507 | 481.719 | -1.943 | 1.13E-11 |
| SNHG6     | ENSG0000 | 110.921 | 47.349  | 1.211  | 2.29E-36 |
| H2AFJ     | ENSG0000 | 110.208 | 42.105  | 1.367  | 5.74E-43 |
| UBAP1L    | ENSG0000 | 0.45    | 1.93    | -1.015 | 5.99E-24 |

|           |          |          |          |        |          |
|-----------|----------|----------|----------|--------|----------|
| TWF2      | ENSG0000 | 30.83    | 12.465   | 1.241  | 1.10E-36 |
| MTND4P1   | ENSG0000 | 39.65    | 0.81     | 4.489  | 5.49E-17 |
| RRN3P1    | ENSG0000 | 1.24     | 5.655    | -1.571 | 1.25E-33 |
| TRIM52-A  | ENSG0000 | 9.2      | 3.35     | 1.229  | 7.07E-50 |
| MTATP6P1  | ENSG0000 | 1387.526 | 3715.008 | -1.42  | 1.04E-23 |
| RP11-328  | ENSG0000 | 3.02     | 13.645   | -1.865 | 2.86E-17 |
| RP11-510  | ENSG0000 | 0.27     | 1.56     | -1.011 | 8.48E-13 |
| RP11-290  | ENSG0000 | 3.19     | 20.87    | -2.384 | 1.44E-36 |
| LINC01095 | ENSG0000 | 0.55     | 23.3     | -3.971 | 3.78E-87 |
| NPM1P27   | ENSG0000 | 5.95     | 1.935    | 1.244  | 5.04E-35 |
| RP11-434  | ENSG0000 | 1.32     | 11.964   | -2.482 | 2.64E-30 |
| RP11-423  | ENSG0000 | 0.19     | 1.485    | -1.062 | 2.96E-15 |
| ECSCR     | ENSG0000 | 6.8      | 2.27     | 1.254  | 1.22E-32 |
| PVT1      | ENSG0000 | 6.01     | 1.035    | 1.784  | 7.25E-20 |
| GBA3      | ENSG0000 | 8.22     | 31.277   | -1.808 | 1.37E-18 |
| LINC01018 | ENSG0000 | 5.58     | 19.171   | -1.616 | 8.20E-12 |
| YJEFN3    | ENSG0000 | 0.55     | 2.535    | -1.189 | 4.56E-10 |
| RP11-622  | ENSG0000 | 5.56     | 23.667   | -1.911 | 1.49E-28 |
| HULC      | ENSG0000 | 307.319  | 57.466   | 2.399  | 1.54E-20 |
| F11-AS1   | ENSG0000 | 2.75     | 8.87     | -1.396 | 2.92E-32 |
| IGKV1D-3  | ENSG0000 | 3.94     | 11.967   | -1.392 | 4.79E-03 |
| MALAT1    | ENSG0000 | 13.79    | 31.885   | -1.153 | 4.83E-04 |
| RP11-119  | ENSG0000 | 4.61     | 10.829   | -1.076 | 2.11E-05 |
| RNA5SP21  | ENSG0000 | 0        | 7.302    | -3.054 | 1.59E-19 |
| TRNP1     | ENSG0000 | 5.14     | 1.415    | 1.346  | 8.41E-12 |
| LINC01604 | ENSG0000 | 8.22     | 3.345    | 1.085  | 3.98E-34 |
| PRKDC     | ENSG0000 | 22.389   | 9.685    | 1.13   | 4.97E-16 |
| RP11-115  | ENSG0000 | 0.56     | 3.09     | -1.391 | 1.34E-09 |
| RP11-115  | ENSG0000 | 1.93     | 7.789    | -1.585 | 9.26E-04 |
| RP11-496  | ENSG0000 | 0.65     | 2.6      | -1.125 | 9.34E-08 |
| RNF185-A  | ENSG0000 | 3.09     | 0.212    | 1.755  | 6.30E-05 |
| RP11-326  | ENSG0000 | 0.96     | 7.133    | -2.053 | 1.31E-07 |
| SAA2-SAA  | ENSG0000 | 2.75     | 17.052   | -2.267 | 1.56E-11 |
| PIGY      | ENSG0000 | 8.94     | 0.005    | 3.306  | 6.41E-13 |
| RP11-111  | ENSG0000 | 4.52     | 1.645    | 1.061  | 4.45E-37 |
| RP11-196  | ENSG0000 | 0.57     | 2.975    | -1.34  | 2.77E-47 |
| MT1JP     | ENSG0000 | 0.05     | 4.62     | -2.42  | 1.61E-49 |
| TRAPPC2B  | ENSG0000 | 10.94    | 3.775    | 1.322  | 5.49E-35 |
| RPL41P2   | ENSG0000 | 37.139   | 17.225   | 1.065  | 2.90E-18 |
| RP1-102E  | ENSG0000 | 0.27     | 2.495    | -1.46  | 2.12E-46 |
| RP11-73M  | ENSG0000 | 1.31     | 0        | 1.208  | 1.45E-21 |
| RP11-680  | ENSG0000 | 3.77     | 1.305    | 1.049  | 1.13E-16 |
| SNRPEP2   | ENSG0000 | 7.97     | 1.61     | 1.781  | 2.82E-64 |
| HP        | ENSG0000 | 8497.954 | 26421.96 | -1.636 | 2.98E-17 |
| RP11-203  | ENSG0000 | 1.67     | 4.945    | -1.155 | 4.29E-11 |
| RP11-579  | ENSG0000 | 1.95     | 0.33     | 1.149  | 5.42E-28 |
| RP11-620  | ENSG0000 | 5.08     | 1.055    | 1.565  | 8.54E-53 |
| RP11-114  | ENSG0000 | 17.64    | 3.005    | 2.219  | 4.02E-19 |
| RP11-256  | ENSG0000 | 0.83     | 3.32     | -1.239 | 5.22E-20 |
| RP11-386  | ENSG0000 | 69.622   | 32.095   | 1.094  | 7.95E-18 |
| RP11-161  | ENSG0000 | 58.602   | 23.37    | 1.29   | 4.29E-30 |
| RP11-164  | ENSG0000 | 0.77     | 2.985    | -1.171 | 1.98E-22 |
| RP11-66N  | ENSG0000 | 1.31     | 5.55     | -1.504 | 6.60E-14 |
| LINC01595 | ENSG0000 | 0.99     | 6.505    | -1.915 | 1.21E-14 |
| RP11-316  | ENSG0000 | 78.699   | 24.778   | 1.628  | 2.61E-19 |
| RP11-830  | ENSG0000 | 0.04     | 1.39     | -1.2   | 2.41E-51 |
| SLX1B-SUI | ENSG0000 | 0.99     | 3.245    | -1.093 | 4.32E-11 |
| MRC1      | ENSG0000 | 1.92     | 5.135    | -1.071 | 2.95E-07 |

|           |          |         |         |        |           |
|-----------|----------|---------|---------|--------|-----------|
| RP11-345J | ENSG0000 | 2.12    | 0       | 1.642  | 1.56E-04  |
| MT1L      | ENSG0000 | 5.34    | 45.263  | -2.867 | 1.56E-33  |
| PECAM1    | ENSG0000 | 11.39   | 3.285   | 1.532  | 2.92E-39  |
| SMG1P7    | ENSG0000 | 1.05    | 4.145   | -1.328 | 1.69E-23  |
| RP11-345J | ENSG0000 | 18.04   | 5.385   | 1.576  | 5.76E-58  |
| RP11-676J | ENSG0000 | 0.11    | 1.625   | -1.242 | 6.65E-29  |
| RP11-667I | ENSG0000 | 6.33    | 0.655   | 2.147  | 5.25E-22  |
| GDF2      | ENSG0000 | 0       | 4.84    | -2.546 | 1.40E-115 |
| RP11-334F | ENSG0000 | 6.87    | 0.46    | 2.43   | 1.24E-44  |
| RP11-159I | ENSG0000 | 1       | 3.94    | -1.305 | 8.45E-12  |
| SNRPGP2   | ENSG0000 | 9.32    | 2.87    | 1.415  | 5.66E-38  |
| GJA5      | ENSG0000 | 2.24    | 0.385   | 1.226  | 1.02E-31  |
| RBM8A     | ENSG0000 | 83.152  | 34.049  | 1.264  | 3.29E-57  |
| RP11-138I | ENSG0000 | 198.074 | 98.4    | 1.002  | 6.64E-21  |
| RP11-524F | ENSG0000 | 0.37    | 2.685   | -1.427 | 1.64E-41  |
| RP11-452I | ENSG0000 | 7.38    | 2.75    | 1.16   | 3.59E-14  |
| RP5-890E1 | ENSG0000 | 4.32    | 0       | 2.411  | 2.20E-14  |
| MRPS21    | ENSG0000 | 63.999  | 22.47   | 1.47   | 1.96E-74  |
| FXYP1     | ENSG0000 | 79.34   | 237.14  | -1.568 | 2.63E-12  |
| RP11-49K  | ENSG0000 | 3.59    | 1.135   | 1.104  | 3.04E-08  |
| SMUG1P1   | ENSG0000 | 0       | 1.055   | -1.039 | 1.88E-58  |
| POLR2J2   | ENSG0000 | 5.5     | 2.205   | 1.02   | 1.64E-14  |
| NDUFA7    | ENSG0000 | 96.837  | 42.579  | 1.167  | 9.36E-70  |
| RP3-461F1 | ENSG0000 | 7.65    | 1.78    | 1.638  | 3.70E-34  |
| ZSCAN16   | ENSG0000 | 8.45    | 3.54    | 1.058  | 4.19E-41  |
| PTOV1-AS  | ENSG0000 | 2.39    | 6.895   | -1.22  | 4.51E-08  |
| RP11-394C | ENSG0000 | 0.48    | 2.335   | -1.172 | 1.21E-17  |
| RP5-940J5 | ENSG0000 | 20.359  | 2.015   | 2.825  | 1.22E-06  |
| RP11-34P  | ENSG0000 | 0.85    | 2.82    | -1.046 | 5.09E-08  |
| RP1-232P  | ENSG0000 | 0.06    | 1.595   | -1.292 | 1.26E-34  |
| NBPF8     | ENSG0000 | 2.65    | 12.719  | -1.91  | 1.69E-33  |
| HIST2H4A  | ENSG0000 | 8.54    | 3.165   | 1.196  | 6.77E-22  |
| RP11-238F | ENSG0000 | 0.14    | 2.04    | -1.415 | 1.53E-04  |
| SRXN1     | ENSG0000 | 30.141  | 10.395  | 1.45   | 1.06E-28  |
| RP11-125K | ENSG0000 | 0.32    | 2.325   | -1.333 | 1.81E-26  |
| SNX29P2   | ENSG0000 | 0.59    | 3.925   | -1.631 | 4.19E-40  |
| RP11-42O  | ENSG0000 | 4.66    | 11.395  | -1.131 | 6.70E-13  |
| HIST2H2A  | ENSG0000 | 29.59   | 9.48    | 1.545  | 1.62E-12  |
| RP11-284F | ENSG0000 | 1.99    | 0.06    | 1.496  | 3.11E-29  |
| RP11-713I | ENSG0000 | 10.17   | 3.25    | 1.394  | 3.38E-32  |
| STAG3L5P  | ENSG0000 | 14.78   | 42.15   | -1.451 | 4.67E-08  |
| LL22NC03  | ENSG0000 | 1.96    | 0.29    | 1.198  | 1.07E-26  |
| RP3-508I1 | ENSG0000 | 0       | 1.745   | -1.457 | 4.80E-18  |
| RP11-458F | ENSG0000 | 1.31    | 3.715   | -1.029 | 1.74E-12  |
| RP4-583P  | ENSG0000 | 2.09    | 7.12    | -1.394 | 1.02E-32  |
| RP11-756J | ENSG0000 | 2.13    | 0       | 1.646  | 2.60E-20  |
| TAF9      | ENSG0000 | 33.171  | 15.97   | 1.01   | 1.93E-35  |
| Metazoa_5 | ENSG0000 | 343.769 | 129.247 | 1.404  | 1.20E-14  |
| uc_338    | ENSG0000 | 0       | 1.365   | -1.242 | 4.08E-27  |
| RP4-568C  | ENSG0000 | 1.02    | 3.25    | -1.073 | 3.07E-10  |
| RP4-564F  | ENSG0000 | 0.54    | 5.865   | -2.156 | 5.41E-43  |
| RP13-516I | ENSG0000 | 0.38    | 1.96    | -1.101 | 1.50E-25  |
| PRSS2     | ENSG0000 | 0.03    | 1.25    | -1.127 | 1.60E-22  |
| HULC      | ENSG0000 | 127.221 | 34.625  | 1.848  | 6.45E-12  |
| UHRF1     | ENSG0000 | 1.79    | 0.115   | 1.323  | 6.25E-35  |
| HERC2P2   | ENSG0000 | 4.35    | 13.429  | -1.431 | 8.98E-06  |
| MARCKS    | ENSG0000 | 15.05   | 5.1     | 1.396  | 5.08E-28  |
| TRAC      | ENSG0000 | 7.94    | 2.665   | 1.286  | 3.38E-12  |

|           |          |          |         |        |          |
|-----------|----------|----------|---------|--------|----------|
| PSMB3     | ENSG0000 | 225.627  | 100.068 | 1.165  | 7.70E-57 |
| SRD5A2    | ENSG0000 | 1.17     | 6.605   | -1.809 | 1.59E-20 |
| RP11-452I | ENSG0000 | 37.569   | 5.96    | 2.47   | 9.36E-52 |
| IGLV2-8   | ENSG0000 | 0.55     | 2.785   | -1.288 | 3.27E-06 |
| RP11-132J | ENSG0000 | 1.1      | 6.998   | -1.929 | 2.20E-45 |
| RP11-609I | ENSG0000 | 1.08     | 3.6     | -1.145 | 9.69E-08 |
| RP11-369J | ENSG0000 | 1.73     | 0.33    | 1.038  | 8.97E-05 |
| RP11-258F | ENSG0000 | 0.23     | 1.655   | -1.11  | 9.13E-37 |
| RP11-715I | ENSG0000 | 0        | 1.02    | -1.014 | 1.02E-18 |
| RPL41     | ENSG0000 | 2353.512 | 831.227 | 1.5    | 7.63E-52 |
| RP11-394F | ENSG0000 | 0.23     | 1.495   | -1.02  | 2.61E-32 |
| RP11-43N  | ENSG0000 | 0.69     | 3.215   | -1.318 | 1.67E-22 |
| RP11-286I | ENSG0000 | 0.06     | 1.165   | -1.03  | 5.25E-29 |
| RP11-361I | ENSG0000 | 20.53    | 65.36   | -1.624 | 1.61E-03 |
| LINC0134E | ENSG0000 | 1.2      | 8.645   | -2.132 | 5.14E-42 |
| U91328.1  | ENSG0000 | 1.96     | 0       | 1.566  | 1.88E-03 |
| RP11-817J | ENSG0000 | 0.04     | 1.375   | -1.191 | 3.70E-21 |
| WASH5P    | ENSG0000 | 5.2      | 12.53   | -1.126 | 3.52E-05 |
| LINC0100Z | ENSG0000 | 3.89     | 14.567  | -1.671 | 1.84E-11 |

PIA2 (TCGA)
