# Supplementary material for: Identifying Potential Tumor Antigens and Antigens-Related Subtypes in Hepatocellular Carcinoma for mRNA Vaccine Development
Source: Hindawi journal article supplement (doi:10.1155/2022/6851026), 2022-08-29
Supplement: f1 [file 6851026.f1.zip]

Table 1: clinical data from ICGC.

| sampleID | cancer_hist | cancer_type | disease_status | donor_age | donor_age | donor_age |
|----------|-------------|-------------|----------------|-----------|-----------|-----------|
| DO44923  | unknown     |             |                | 85        |           | 85        |
| DO44883  | unknown     |             |                | 75        |           | 75        |
| DO52238  | unknown     |             |                | 58        |           | 58        |
| DO22851  | unknown     |             |                | 73        |           | 73        |
| DO52193  | unknown     |             |                | 72        |           | 72        |
| DO22966  | unknown     |             |                | 62        |           | 62        |
| DO52298  | unknown     |             |                | 83        |           | 83        |
| DO48486  | unknown     |             |                | 75        |           | 75        |
| DO23043  | unknown     |             |                | 62        |           | 62        |
| DO219539 | unknown     |             |                | 70        |           | 70        |
| DO219549 | unknown     |             |                | 65        |           | 65        |
| DO52320  | unknown     |             |                | 67        |           | 67        |
| DO49694  | unknown     |             |                | 70        |           | 70        |
| DO49696  | unknown     |             |                | 65        |           | 65        |
| DO52299  | unknown     |             |                | 53        |           | 53        |
| DO52301  | unknown     |             |                | 68        |           | 68        |
| DO23002  | unknown     |             |                | 50        |           | 50        |
| DO49695  | unknown     |             |                | 78        |           | 78        |
| DO52232  | unknown     |             |                | 64        |           | 64        |
| DO22941  | unknown     |             |                | 35        |           | 35        |
| DO23006  | unknown     |             |                | 80        |           | 80        |
| DO44903  | unknown     |             |                | 67        |           | 67        |
| DO52216  | unknown     |             |                | 63        |           | 63        |
| DO44994  | unknown     |             |                | 75        |           | 75        |
| DO52203  | unknown     |             |                | 69        |           | 69        |
| DO52322  | unknown     |             |                | 56        |           | 56        |
| DO23014  | unknown     |             |                | 40        |           | 40        |
| DO44899  | unknown     |             |                | 65        |           | 65        |
| DO48592  | unknown     |             |                | 72        |           | 72        |
| DO22962  | unknown     |             |                | 66        |           | 66        |
| DO52295  | unknown     |             |                | 51        |           | 51        |
| DO52201  | unknown     |             |                | 68        |           | 68        |
| DO44887  | unknown     |             |                | 60        |           | 60        |
| DO52199  | unknown     |             |                | 48        |           | 48        |
| DO44915  | unknown     |             |                | 57        |           | 57        |
| DO52192  | unknown     |             |                | 81        |           | 81        |
| DO49717  | unknown     |             |                | 68        |           | 68        |
| DO23048  | unknown     |             |                | 23        |           | 23        |
| DO44982  | unknown     |             |                | 67        |           | 67        |
| DO52230  | unknown     |             |                | 53        |           | 53        |
| DO22956  | unknown     |             |                | 54        |           | 54        |
| DO23073  | unknown     |             |                | 52        |           | 52        |
| DO52202  | unknown     |             |                | 52        |           | 52        |
| DO44878  | unknown     |             |                | 45        |           | 45        |
| DO219529 | unknown     |             |                | 59        |           | 59        |
| DO223919 | unknown     |             |                | 33        |           | 33        |
| DO222354 | unknown     |             | relapse        | 39        | 39        | 43        |
| DO222355 | unknown     |             | relapse        | 24        | 24        | 34        |
| DO222357 | unknown     |             | complete r     | 27        | 27        | 28        |
| DO222358 | unknown     |             | relapse        | 50        | 50        | 53        |
| DO48492  | unknown     |             |                | 64        |           | 64        |
| DO22837  | unknown     |             |                | 75        |           | 75        |
| DO44954  | unknown     |             |                | 43        |           | 43        |
| DO45001  | unknown     |             |                | 37        |           | 37        |
| DO219535 | unknown     |             |                | 85        |           | 85        |
| DO52307  | unknown     |             |                | 58        |           | 58        |

|          |         |            |    |    |    |
|----------|---------|------------|----|----|----|
| DO44990  | unknown |            | 77 |    | 77 |
| DO44889  | unknown |            | 75 |    | 75 |
| DO223923 | unknown |            | 74 |    | 74 |
| DO22838  | unknown |            | 80 |    | 80 |
| DO22908  | unknown |            | 76 |    | 76 |
| DO219505 | unknown |            | 58 |    | 58 |
| DO219515 | unknown |            | 64 |    | 64 |
| DO22869  | unknown |            | 52 |    | 52 |
| DO22802  | unknown |            | 43 | 43 |    |
| DO22804  | unknown | relapse    | 67 | 67 | 78 |
| DO22810  | unknown | complete r | 42 | 42 | 48 |
| DO22812  | unknown | relapse    | 32 | 32 | 34 |
| DO228155 | unknown |            | 43 | 43 |    |
| DO228157 | unknown |            | 45 | 45 |    |
| DO228186 |         |            | 50 | 50 |    |
| DO228187 |         |            | 66 | 66 |    |
| DO228188 |         |            | 52 | 52 |    |
| DO228189 |         |            | 58 | 58 |    |
| DO228190 |         |            | 39 | 39 |    |
| DO228191 |         |            | 45 | 45 |    |
| DO228192 |         |            | 55 | 55 |    |
| DO228193 |         |            | 58 | 58 |    |
| DO228194 |         |            | 39 | 39 |    |
| DO228195 |         |            | 73 | 73 |    |
| DO228196 |         |            | 55 | 55 |    |
| DO228197 |         |            | 41 | 41 |    |
| DO228198 |         |            | 68 | 68 |    |
| DO228199 |         |            | 65 | 65 |    |
| DO228200 |         |            | 44 | 44 |    |
| DO228201 |         |            | 35 | 35 |    |
| DO228202 |         |            | 63 | 63 |    |
| DO228203 |         |            | 45 | 45 |    |
| DO228204 |         |            | 53 | 53 |    |
| DO228205 |         |            | 65 | 65 |    |
| DO228206 |         |            | 43 | 43 |    |
| DO228207 |         |            | 57 | 57 |    |
| DO228208 |         |            | 61 | 61 |    |
| DO228209 |         |            | 38 | 38 |    |
| DO228210 |         |            | 52 | 52 |    |
| DO228211 |         |            | 45 | 45 |    |
| DO228212 |         |            | 30 | 30 |    |
| DO228213 |         |            | 48 | 48 |    |
| DO228214 |         |            | 69 | 69 |    |
| DO228215 |         |            | 39 | 39 |    |
| DO228216 |         |            | 26 | 26 |    |
| DO228217 |         |            | 42 | 42 |    |
| DO228218 |         |            | 35 | 35 |    |
| DO228219 |         |            | 33 | 33 |    |
| DO228220 |         |            | 42 | 42 |    |
| DO228223 |         |            | 32 | 32 |    |
| DO228224 |         |            | 55 | 55 |    |
| DO228225 |         |            | 48 | 48 |    |
| DO228226 |         |            | 62 | 62 |    |
| DO228227 |         |            | 40 | 40 |    |
| DO228228 |         |            | 63 | 63 |    |
| DO228229 |         |            | 39 | 39 |    |
| DO228230 |         |            | 47 | 47 |    |
| DO228232 |         |            | 52 | 52 |    |

|          |         |            |    |    |    |
|----------|---------|------------|----|----|----|
| DO228234 |         |            | 61 | 61 |    |
| DO228235 |         |            | 46 | 46 |    |
| DO228237 |         |            | 37 | 37 |    |
| DO228239 |         |            | 54 | 54 |    |
| DO228241 |         |            | 44 | 44 |    |
| DO228243 |         |            | 71 | 71 |    |
| DO228244 |         |            | 54 | 54 |    |
| DO228245 |         |            | 34 | 34 |    |
| DO228252 |         |            | 49 | 49 |    |
| DO228261 |         |            | 52 | 52 |    |
| DO228264 |         |            | 65 | 65 |    |
| DO228270 |         |            | 62 | 62 |    |
| DO228275 |         |            | 61 | 61 |    |
| DO228278 |         |            | 43 | 43 |    |
| DO228280 |         |            | 44 | 44 |    |
| DO228284 |         |            | 46 | 46 |    |
| DO228288 |         |            | 39 | 39 |    |
| DO228297 |         |            | 39 | 39 |    |
| DO228299 |         |            | 38 | 38 |    |
| DO22830  | unknown | complete r | 83 | 83 | 86 |
| DO228301 |         |            | 53 | 53 |    |
| DO228311 |         |            | 39 | 39 |    |
| DO228313 |         |            | 49 | 49 |    |
| DO228327 |         |            | 56 | 56 |    |
| DO228330 |         |            | 45 | 45 |    |
| DO228333 |         |            | 53 | 53 |    |
| DO228337 |         |            | 40 | 40 |    |
| DO44942  | unknown |            | 70 |    | 70 |
| DO228342 |         |            | 29 | 29 |    |
| DO228348 |         |            | 39 | 39 |    |
| DO219559 | unknown |            | 29 |    | 29 |
| DO228357 |         |            | 47 | 47 |    |
| DO228359 |         |            | 57 | 57 |    |
| DO22926  | unknown |            | 69 |    | 69 |
| DO228362 |         |            | 46 | 46 |    |
| DO228364 |         |            | 36 | 36 |    |
| DO22944  | unknown |            | 76 |    | 76 |
| DO228374 |         |            | 45 | 45 |    |
| DO228377 |         |            | 57 | 57 |    |
| DO219517 | unknown |            | 82 |    | 82 |
| DO228380 |         |            | 37 | 37 |    |
| DO228385 |         |            | 55 | 55 |    |
| DO44970  | unknown |            | 56 |    | 56 |
| DO228390 |         |            | 58 | 58 |    |
| DO228393 |         |            | 48 | 48 |    |
| DO228401 |         |            | 49 | 49 |    |
| DO228405 |         |            | 45 | 45 |    |
| DO228408 |         |            | 49 | 49 |    |
| DO228416 |         |            | 61 | 61 |    |
| DO44888  | unknown |            | 64 |    | 64 |
| DO228420 |         |            | 46 | 46 |    |
| DO228422 |         |            | 46 | 46 |    |
| DO228432 |         |            | 48 | 48 |    |
| DO228434 |         |            | 63 | 63 |    |
| DO228436 |         |            | 44 | 44 |    |
| DO228445 |         |            | 57 | 57 |    |
| DO22887  | unknown |            | 72 |    | 72 |
| DO228456 |         |            | 45 | 45 |    |

|          |         |    |    |    |
|----------|---------|----|----|----|
| DO228459 |         | 49 | 49 |    |
| DO228461 |         | 41 | 41 |    |
| DO228464 |         | 59 | 59 |    |
| DO228470 |         | 61 | 61 |    |
| DO228474 |         | 50 | 50 |    |
| DO52302  | unknown | 90 |    | 90 |
| DO228487 |         | 50 | 50 |    |
| DO228501 |         | 37 | 37 |    |
| DO228508 |         | 61 | 61 |    |
| DO22938  | unknown | 42 |    | 42 |
| DO228512 |         | 56 | 56 |    |
| DO228520 |         | 57 | 57 |    |
| DO228522 |         | 56 | 56 |    |
| DO228524 |         | 43 | 43 |    |
| DO228531 |         | 60 | 60 |    |
| DO44882  | unknown | 80 |    | 80 |
| DO228540 |         | 39 | 39 |    |
| DO228546 |         | 64 | 64 |    |
| DO228552 |         | 52 | 52 |    |
| DO228553 |         | 51 | 51 |    |
| DO228555 |         | 59 | 59 |    |
| DO228556 |         | 41 | 41 |    |
| DO228559 |         | 51 | 51 |    |
| DO228560 |         | 44 | 44 |    |
| DO228562 |         | 49 | 49 |    |
| DO228566 |         | 58 | 58 |    |
| DO219521 | unknown | 58 |    | 58 |
| DO228570 |         | 49 | 49 |    |
| DO228574 |         | 40 | 40 |    |
| DO228577 |         | 49 | 49 |    |
| DO228585 |         | 51 | 51 |    |
| DO228589 |         | 49 | 49 |    |
| DO228592 |         | 40 | 40 |    |
| DO228597 |         | 55 | 55 |    |
| DO219511 | unknown | 64 |    | 64 |
| DO228601 |         | 46 | 46 |    |
| DO228608 |         | 46 | 46 |    |
| DO228609 |         | 53 | 53 |    |
| DO228617 |         | 51 | 51 |    |
| DO228623 |         | 37 | 37 |    |
| DO48518  | unknown | 76 |    | 76 |
| DO228634 |         | 61 | 61 |    |
| DO228642 |         | 26 | 26 |    |
| DO228646 |         | 49 | 49 |    |
| DO228650 |         | 59 | 59 |    |
| DO228652 |         | 53 | 53 |    |
| DO228654 |         | 72 | 72 |    |
| DO228655 |         | 64 | 64 |    |
| DO228659 |         | 42 | 42 |    |
| DO52334  | unknown | 73 |    | 73 |
| DO228664 |         | 46 | 46 |    |
| DO228667 |         | 59 | 59 |    |
| DO228672 |         | 39 | 39 |    |
| DO228677 |         | 47 | 47 |    |
| DO228682 |         | 46 | 46 |    |
| DO22842  | unknown | 81 |    | 81 |
| DO228694 |         | 47 | 47 |    |
| DO228702 |         | 60 | 60 |    |

|          |         |            |    |    |    |
|----------|---------|------------|----|----|----|
| DO228711 |         |            | 41 | 41 |    |
| DO22834  | unknown |            | 74 |    | 74 |
| DO228726 |         |            | 52 | 52 |    |
| DO228733 |         |            | 36 | 36 |    |
| DO228743 |         |            | 44 | 44 |    |
| DO228749 |         |            | 36 | 36 |    |
| DO23010  | unknown |            | 57 |    | 57 |
| DO228753 |         |            | 62 | 62 |    |
| DO228766 |         |            | 48 | 48 |    |
| DO228770 |         |            | 58 | 58 |    |
| DO228773 |         |            | 51 | 51 |    |
| DO228779 |         |            | 60 | 60 |    |
| DO219507 | unknown | complete r | 55 |    | 59 |
| DO228784 |         |            | 65 | 65 |    |
| DO228786 |         |            | 63 | 63 |    |
| DO228793 |         |            | 39 | 39 |    |
| DO228796 |         |            | 52 | 52 |    |
| DO228802 |         |            | 61 | 61 |    |
| DO228806 |         |            | 50 | 50 |    |
| DO228807 |         |            | 49 | 49 |    |
| DO228809 |         |            | 36 | 36 |    |
| DO23063  | unknown |            | 68 |    | 68 |
| DO228813 |         |            | 44 | 44 |    |
| DO228815 |         |            | 62 | 62 |    |
| DO228816 |         |            | 51 | 51 |    |
| DO228819 |         |            | 60 | 60 |    |
| DO228821 |         |            | 62 | 62 |    |
| DO228823 |         |            | 56 | 56 |    |
| DO228825 |         |            | 52 | 52 |    |
| DO228827 |         |            | 45 | 45 |    |
| DO228828 |         |            | 65 | 65 |    |
| DO228832 |         |            | 48 | 48 |    |
| DO228833 |         |            | 65 | 65 |    |
| DO228835 |         |            | 56 | 56 |    |
| DO228837 |         |            | 41 | 41 |    |
| DO219506 | unknown |            | 51 |    | 51 |
| DO228841 |         |            | 48 | 48 |    |
| DO228844 |         |            | 57 | 57 |    |
| DO228846 |         |            | 39 | 39 |    |
| DO228848 |         |            | 28 | 28 |    |
| DO228850 |         |            | 47 | 47 |    |
| DO228852 |         |            | 53 | 53 |    |
| DO228856 |         |            | 58 | 58 |    |
| DO228860 |         |            | 49 | 49 |    |
| DO228862 |         |            | 48 | 48 |    |
| DO228863 |         |            | 48 | 48 |    |
| DO228864 |         |            | 33 | 33 |    |
| DO228866 |         |            | 61 | 61 |    |
| DO228867 |         |            | 64 | 64 |    |
| DO52198  | unknown |            | 61 |    | 61 |
| DO228870 |         |            | 55 | 55 |    |
| DO228871 |         |            | 49 | 49 |    |
| DO228874 |         |            | 50 | 50 |    |
| DO228877 |         |            | 72 | 72 |    |
| DO228878 |         |            | 59 | 59 |    |
| DO228879 |         |            | 53 | 53 |    |
| DO228881 |         |            | 65 | 65 |    |
| DO228883 | unknown |            | 41 | 41 |    |

|          |         |    |    |    |
|----------|---------|----|----|----|
| DO228884 |         | 60 | 60 |    |
| DO228886 |         | 48 | 48 |    |
| DO228887 | unknown | 69 | 69 |    |
| DO228890 |         | 47 | 47 |    |
| DO228892 |         | 44 | 44 |    |
| DO228893 | unknown | 68 | 68 |    |
| DO228894 | unknown | 64 | 64 |    |
| DO228895 |         | 26 | 26 |    |
| DO228896 | unknown | 62 | 62 |    |
| DO228897 | unknown | 74 | 74 |    |
| DO228898 | unknown | 76 | 76 |    |
| DO228899 | unknown | 30 | 30 |    |
| DO44879  | unknown | 78 |    | 78 |
| DO228900 | unknown | 60 | 60 |    |
| DO228901 | unknown | 57 | 57 |    |
| DO228902 | unknown | 57 | 57 |    |
| DO228903 | unknown | 32 | 32 |    |
| DO228904 | unknown | 79 | 79 |    |
| DO228905 | unknown | 49 | 49 |    |
| DO228906 | unknown | 81 | 81 |    |
| DO228907 | unknown | 81 | 81 |    |
| DO228908 | unknown | 44 | 44 |    |
| DO228909 | unknown | 53 | 53 |    |
| DO228911 | unknown | 30 | 30 |    |
| DO228912 | unknown | 53 | 53 |    |
| DO228913 | unknown | 48 | 48 |    |
| DO228914 | unknown | 42 | 42 |    |
| DO228915 | unknown | 37 | 37 |    |
| DO228916 | unknown | 55 | 55 |    |
| DO228917 | unknown | 45 | 45 |    |
| DO228918 | unknown | 46 | 46 |    |
| DO228919 | unknown | 67 | 67 |    |
| DO228920 | unknown | 45 | 45 |    |
| DO228921 | unknown | 49 | 49 |    |
| DO228922 | unknown | 48 | 48 |    |
| DO228923 | unknown | 32 | 32 |    |
| DO228924 | unknown | 86 | 86 |    |
| DO228925 | unknown | 28 | 28 |    |
| DO228926 | unknown | 64 | 64 |    |
| DO228928 | unknown | 53 | 53 |    |
| DO228929 | unknown | 35 | 35 |    |
| DO48589  | unknown | 71 |    | 71 |
| DO228931 | unknown | 64 | 64 |    |
| DO228933 | unknown | 48 | 48 |    |
| DO228934 | unknown | 49 | 49 |    |
| DO228936 | unknown | 46 | 46 |    |
| DO228937 | unknown | 76 | 76 |    |
| DO228938 | unknown | 51 | 51 |    |
| DO228939 | unknown | 56 | 56 |    |
| DO228940 | unknown | 65 | 65 |    |
| DO228941 | unknown | 46 | 46 |    |
| DO228942 | unknown | 40 | 40 |    |
| DO228943 | unknown | 65 | 65 |    |
| DO228944 | unknown | 61 | 61 |    |
| DO228945 | unknown | 48 | 48 |    |
| DO228946 | unknown | 63 | 63 |    |
| DO228947 | unknown | 70 | 70 |    |
| DO228948 | unknown | 64 | 64 |    |

|          |         |    |    |    |
|----------|---------|----|----|----|
| DO228949 | unknown | 56 | 56 |    |
| DO228950 | unknown | 48 | 48 |    |
| DO228952 | unknown | 16 | 16 |    |
| DO228955 | unknown | 50 | 50 |    |
| DO228957 | unknown | 72 | 72 |    |
| DO22947  | unknown | 51 |    | 51 |
| DO228960 | unknown | 46 | 46 |    |
| DO228961 | unknown | 38 | 38 |    |
| DO228963 | unknown | 26 | 26 |    |
| DO228965 | unknown | 41 | 41 |    |
| DO228967 | unknown | 40 | 40 |    |
| DO228969 | unknown | 67 | 67 |    |
| DO228971 | unknown | 62 | 62 |    |
| DO228972 | unknown | 28 | 28 |    |
| DO228974 | unknown | 77 | 77 |    |
| DO228976 | unknown | 56 | 56 |    |
| DO228978 | unknown | 46 | 46 |    |
| DO228981 | unknown | 42 | 42 |    |
| DO228983 | unknown | 42 | 42 |    |
| DO228985 | unknown | 67 | 67 |    |
| DO228986 | unknown | 67 | 67 |    |
| DO228988 | unknown | 53 | 53 |    |
| DO44881  | unknown | 76 |    | 76 |
| DO228991 | unknown | 68 | 68 |    |
| DO228993 | unknown | 56 | 56 |    |
| DO228998 | unknown | 77 | 77 |    |
| DO229004 | unknown | 72 | 72 |    |
| DO229006 | unknown | 65 | 65 |    |
| DO229008 | unknown | 56 | 56 |    |
| DO229009 | unknown | 73 | 73 |    |
| DO229012 | unknown | 41 | 41 |    |
| DO229015 | unknown | 62 | 62 |    |
| DO229018 | unknown | 64 | 64 |    |
| DO229019 | unknown | 26 | 26 |    |
| DO45017  | unknown | 61 |    | 61 |
| DO229022 | unknown | 57 | 57 |    |
| DO229024 | unknown | 73 | 73 |    |
| DO229025 | unknown | 49 | 49 |    |
| DO229026 | unknown | 59 | 59 |    |
| DO229027 | unknown | 46 | 46 |    |
| DO229028 | unknown | 53 | 53 |    |
| DO229029 | unknown | 41 | 41 |    |
| DO229030 | unknown | 49 | 49 |    |
| DO229031 | unknown | 68 | 68 |    |
| DO229032 | unknown | 70 | 70 |    |
| DO229033 | unknown | 56 | 56 |    |
| DO229034 | unknown | 56 | 56 |    |
| DO229035 | unknown | 58 | 58 |    |
| DO229036 | unknown | 50 | 50 |    |
| DO229037 | unknown | 57 | 57 |    |
| DO229038 | unknown | 76 | 76 |    |
| DO229039 | unknown | 50 | 50 |    |
| DO229040 | unknown | 53 | 53 |    |
| DO229041 | unknown | 62 | 62 |    |
| DO229042 | unknown | 47 | 47 |    |
| DO229043 | unknown | 45 | 45 |    |
| DO229044 | unknown | 74 | 74 |    |
| DO229045 | unknown | 45 | 45 |    |

|          |         |             |    |    |    |
|----------|---------|-------------|----|----|----|
| DO229046 | unknown |             | 50 | 50 |    |
| DO229047 | unknown |             | 62 | 62 |    |
| DO229048 | unknown |             | 65 | 65 |    |
| DO229049 | unknown |             | 74 | 74 |    |
| DO219509 | unknown |             | 54 |    | 54 |
| DO229050 | unknown |             | 44 | 44 |    |
| DO229051 | unknown |             | 28 | 28 |    |
| DO229052 | unknown |             |    |    |    |
| DO229053 | unknown |             | 79 | 79 |    |
| DO229054 | unknown |             | 70 | 70 |    |
| DO229055 | unknown |             | 45 | 45 |    |
| DO229056 | unknown |             | 62 | 62 |    |
| DO229057 | unknown |             | 47 | 47 |    |
| DO229058 | unknown |             | 37 | 37 |    |
| DO229059 | unknown |             | 59 | 59 |    |
| DO229060 | unknown |             | 64 | 64 |    |
| DO229061 | unknown |             | 53 | 53 |    |
| DO229062 | unknown |             | 34 | 34 |    |
| DO229063 | unknown |             | 45 | 45 |    |
| DO22911  | unknown |             | 53 |    | 53 |
| DO22890  | unknown |             | 70 |    | 70 |
| DO44884  | unknown |             | 66 |    | 66 |
| DO44875  | unknown |             | 72 |    | 72 |
| DO219513 | unknown | progressio  | 68 |    | 74 |
| DO219519 | unknown | complete r  | 49 |    | 59 |
| DO219523 | unknown | complete r  | 64 |    | 68 |
| DO219525 | unknown | complete r  | 45 |    | 48 |
| DO219527 | unknown | complete r  | 68 |    | 71 |
| DO219531 | unknown |             | 68 |    | 68 |
| DO219533 | unknown | progressio  | 81 |    | 84 |
| DO219537 | unknown | progressio  | 70 |    | 71 |
| DO219541 | unknown | complete r  | 66 |    | 66 |
| DO219543 | unknown | progressio  | 65 |    | 65 |
| DO219545 | unknown | complete r  | 57 |    | 57 |
| DO219547 | unknown | complete r  | 17 |    | 17 |
| DO219551 | unknown | progressio  | 69 |    | 69 |
| DO219552 | unknown | complete r  | 45 |    | 45 |
| DO219553 | unknown | complete r  | 55 |    | 55 |
| DO219555 | unknown | complete r  | 57 |    | 57 |
| DO219557 | unknown | complete r  | 68 |    | 68 |
| DO219560 | unknown | progressio  | 32 |    | 35 |
| DO219561 | unknown | progressio  | 40 |    | 44 |
| DO219563 | unknown | complete r  | 69 |    | 72 |
| DO219565 | unknown | progressio  | 53 |    | 56 |
| DO219567 | unknown | progressio  | 61 |    | 64 |
| DO219569 | unknown | progressio  | 50 |    | 52 |
| DO219571 | unknown | complete r  | 70 |    | 72 |
| DO219573 | unknown | complete r  | 50 |    | 50 |
| DO219575 | unknown | progressio  | 72 |    | 75 |
| DO219577 | unknown | complete r  | 55 |    | 59 |
| DO219578 | unknown | progressio  | 67 |    | 67 |
| DO219579 | unknown |             | 61 |    | 61 |
| DO219580 | unknown | complete r  | 58 |    | 58 |
| DO219581 | unknown | complete r  | 53 |    | 54 |
| DO219582 | unknown | complete r  | 68 |    | 68 |
| DO219583 | unknown | complete r  | 61 |    | 62 |
| DO223911 | unknown | progression |    |    |    |
| DO223912 | unknown | complete r  | 56 |    | 62 |



|          |         |            |    |    |
|----------|---------|------------|----|----|
| DO223913 | unknown | complete r | 59 | 60 |
| DO223914 | unknown |            | 24 | 24 |
| DO223915 | unknown |            | 74 | 74 |
| DO223916 | unknown |            | 20 | 20 |
| DO223917 | unknown |            | 75 | 75 |
| DO223918 | unknown | progressio | 64 | 65 |
| DO23083  | unknown |            |    |    |
| DO23084  | unknown |            |    |    |
| DO23086  | unknown |            |    |    |
| DO23088  | unknown |            |    |    |
| DO23090  | unknown |            |    |    |
| DO23092  | unknown |            |    |    |
| DO23094  | unknown |            |    |    |
| DO23096  | unknown |            |    |    |
| DO23098  | unknown |            |    |    |
| DO23100  | unknown |            |    |    |
| DO23102  | unknown | relapse    | 67 |    |
| DO23104  | unknown | relapse    | 71 |    |
| DO23106  | unknown | relapse    | 46 |    |
| DO23108  | unknown | no evidenc | 69 |    |
| DO23110  | unknown | relapse    | 53 |    |
| DO23112  | unknown | relapse    | 65 |    |
| DO23114  | unknown | relapse    | 57 |    |
| DO23116  | unknown | relapse    | 56 |    |
| DO23118  | unknown | no evidenc | 58 |    |
| DO23120  | unknown | no evidenc | 47 |    |
| DO23122  | unknown | relapse    | 78 |    |
| DO23124  | unknown | no evidenc | 75 |    |
| DO23126  | unknown | no evidenc | 68 |    |
| DO23128  | unknown | relapse    | 69 |    |
| DO23130  | unknown | relapse    | 62 |    |
| DO23132  | unknown | no evidenc | 63 |    |
| DO23134  | unknown | relapse    | 65 |    |
| DO23136  | unknown | no evidenc | 76 |    |
| DO23138  | unknown | no evidenc | 64 |    |
| DO23140  | unknown | relapse    | 62 |    |
| DO23142  | unknown | relapse    | 57 |    |
| DO23144  | unknown | relapse    | 41 |    |
| DO23146  | unknown | relapse    | 58 |    |
| DO23148  | unknown | relapse    | 73 |    |
| DO23150  | unknown | no evidenc | 74 |    |
| DO231512 | unknown | no evidenc | 75 |    |
| DO231515 | unknown | no evidenc | 66 |    |
| DO231518 | unknown | no evidenc | 58 |    |
| DO23152  | unknown | relapse    | 63 |    |
| DO231520 | unknown | no evidenc | 77 |    |
| DO231524 | unknown | no evidenc | 67 |    |
| DO231527 | unknown | no evidenc | 77 |    |
| DO231531 | unknown | no evidenc | 77 |    |
| DO231534 | unknown | no evidenc | 74 |    |
| DO231538 | unknown | no evidenc | 60 |    |
| DO23154  | unknown | relapse    | 68 |    |
| DO231541 | unknown | no evidenc | 65 |    |
| DO231545 | unknown | no evidenc | 70 |    |
| DO231549 | unknown | no evidenc | 58 |    |
| DO231553 | unknown | no evidenc | 56 |    |
| DO231557 | unknown | no evidenc | 59 |    |
| DO231559 | unknown | no evidenc | 72 |    |

|          |         |            |    |
|----------|---------|------------|----|
| DO23156  | unknown | relapse    | 56 |
| DO231563 | unknown | no evidenc | 83 |
| DO231566 | unknown | no evidenc | 63 |
| DO231569 | unknown | no evidenc | 69 |
| DO231573 | unknown | no evidenc | 60 |
| DO231577 | unknown | no evidenc | 70 |
| DO23158  | unknown | relapse    | 65 |
| DO231580 | unknown | no evidenc | 74 |
| DO231583 | unknown | no evidenc | 80 |
| DO231587 | unknown | no evidenc | 70 |
| DO231590 | unknown | no evidenc | 61 |
| DO231593 | unknown | no evidenc | 75 |
| DO231596 | unknown | no evidenc | 63 |
| DO231598 | unknown | no evidenc | 56 |
| DO23160  | unknown | relapse    | 58 |
| DO231602 | unknown | no evidenc | 80 |
| DO231605 | unknown | no evidenc | 74 |
| DO231607 | unknown | no evidenc | 56 |
| DO231610 | unknown | no evidenc | 77 |
| DO231613 | unknown | no evidenc | 68 |
| DO231618 | unknown | no evidenc | 75 |
| DO23162  | unknown | no evidenc | 67 |
| DO231620 | unknown | no evidenc | 74 |
| DO231622 | unknown | no evidenc | 78 |
| DO231625 | unknown | no evidenc | 77 |
| DO231628 | unknown | no evidenc | 73 |
| DO231631 | unknown | no evidenc | 48 |
| DO231636 | unknown | no evidenc | 71 |
| DO231638 | unknown | no evidenc | 75 |
| DO23164  | unknown | relapse    | 77 |
| DO231641 | unknown | no evidenc | 60 |
| DO231645 | unknown | no evidenc | 59 |
| DO231646 | unknown | no evidenc | 80 |
| DO231649 | unknown | no evidenc | 49 |
| DO231652 | unknown | no evidenc | 63 |
| DO231655 | unknown | no evidenc | 66 |
| DO231658 | unknown | no evidenc | 74 |
| DO23166  | unknown | relapse    | 72 |
| DO231663 | unknown | no evidenc | 72 |
| DO231666 | unknown | no evidenc | 38 |
| DO231669 | unknown | no evidenc | 75 |
| DO231672 | unknown | no evidenc | 72 |
| DO231673 | unknown | no evidenc | 59 |
| DO231677 | unknown | no evidenc | 51 |
| DO23168  | unknown | relapse    | 59 |
| DO231681 | unknown | no evidenc | 56 |
| DO231683 | unknown | no evidenc | 69 |
| DO231685 | unknown | no evidenc | 67 |
| DO231690 | unknown | no evidenc | 75 |
| DO231691 | unknown | no evidenc | 32 |
| DO231694 | unknown | no evidenc | 63 |
| DO231697 | unknown | no evidenc | 74 |
| DO23170  | unknown | relapse    | 59 |
| DO231700 | unknown | no evidenc | 58 |
| DO231702 | unknown | no evidenc | 58 |
| DO231704 | unknown | no evidenc | 56 |
| DO231706 | unknown | no evidenc | 49 |
| DO231708 | unknown | no evidenc | 56 |

|          |         |            |    |    |
|----------|---------|------------|----|----|
| DO231710 | unknown | no evidenc | 78 |    |
| DO231712 | unknown | no evidenc | 73 |    |
| DO231713 | unknown | no evidenc | 54 |    |
| DO231716 | unknown | no evidenc | 52 |    |
| DO231718 | unknown | no evidenc | 69 |    |
| DO231719 | unknown | no evidenc | 78 |    |
| DO23172  | unknown | relapse    | 77 |    |
| DO231722 | unknown | no evidenc | 72 |    |
| DO231724 | unknown | no evidenc | 73 |    |
| DO231726 | unknown | no evidenc | 64 |    |
| DO231728 | unknown | no evidenc | 57 |    |
| DO231730 | unknown | no evidenc | 0  |    |
| DO231732 | unknown | no evidenc | 66 |    |
| DO231734 | unknown | no evidenc | 63 |    |
| DO231736 | unknown | no evidenc | 64 |    |
| DO231737 | unknown | no evidenc | 55 |    |
| DO231739 | unknown | no evidenc | 70 |    |
| DO23174  | unknown | relapse    | 77 |    |
| DO231742 | unknown | no evidenc | 58 |    |
| DO231744 | unknown | no evidenc | 75 |    |
| DO231745 | unknown | no evidenc | 76 |    |
| DO231747 | unknown | no evidenc | 78 |    |
| DO231750 | unknown | no evidenc | 72 |    |
| DO231752 | unknown | no evidenc | 72 |    |
| DO231754 | unknown | no evidenc | 65 |    |
| DO231756 | unknown | no evidenc | 56 |    |
| DO231758 | unknown | no evidenc | 58 |    |
| DO23176  | unknown | relapse    | 67 |    |
| DO231760 | unknown | no evidenc | 69 |    |
| DO231762 | unknown | no evidenc | 75 |    |
| DO231764 | unknown | no evidenc | 61 |    |
| DO231766 | unknown | no evidenc | 79 |    |
| DO231768 | unknown | no evidenc | 63 |    |
| DO231770 | unknown | no evidenc | 58 |    |
| DO231772 | unknown | no evidenc | 64 |    |
| DO231774 | unknown | no evidenc | 63 |    |
| DO231776 | unknown | no evidenc | 75 |    |
| DO231778 | unknown | no evidenc | 63 |    |
| DO23178  | unknown | no evidenc | 76 |    |
| DO231780 | unknown | no evidenc | 64 |    |
| DO231782 | unknown | no evidenc | 69 |    |
| DO231784 | unknown | no evidenc | 69 |    |
| DO231786 | unknown | no evidenc | 74 |    |
| DO231788 | unknown | no evidenc | 81 |    |
| DO231790 | unknown | no evidenc | 59 |    |
| DO231792 | unknown | no evidenc | 70 |    |
| DO231793 | unknown | no evidenc | 73 |    |
| DO231795 | unknown |            | 69 | 69 |
| DO231797 | unknown | no evidenc | 72 |    |
| DO231799 | unknown | no evidenc | 54 |    |
| DO23180  | unknown | relapse    | 75 |    |
| DO231801 | unknown | no evidenc | 77 |    |
| DO231803 | unknown | no evidenc | 58 |    |
| DO231805 | unknown | no evidenc | 62 |    |
| DO231806 | unknown |            | 49 | 49 |
| DO231808 | unknown | no evidenc | 74 |    |
| DO231810 | unknown | no evidenc | 74 |    |
| DO231813 | unknown | no evidenc | 73 |    |

|          |         |            |    |    |
|----------|---------|------------|----|----|
| DO231816 | unknown | no evidenc | 50 |    |
| DO231819 | unknown | no evidenc | 68 |    |
| DO23182  | unknown | no evidenc | 64 |    |
| DO231821 | unknown | no evidenc | 70 |    |
| DO231824 | unknown | no evidenc | 59 |    |
| DO231827 | unknown | no evidenc | 60 |    |
| DO231830 | unknown | no evidenc | 83 |    |
| DO231832 | unknown | no evidenc | 76 |    |
| DO231835 | unknown | no evidenc | 61 |    |
| DO231837 | unknown | no evidenc | 68 |    |
| DO231839 | unknown | no evidenc | 74 |    |
| DO23184  | unknown | no evidenc | 76 |    |
| DO231844 | unknown | no evidenc | 47 |    |
| DO231848 | unknown | no evidenc | 67 |    |
| DO231851 | unknown | no evidenc | 71 |    |
| DO231854 | unknown | no evidenc | 60 |    |
| DO231856 | unknown | no evidenc | 53 |    |
| DO231858 | unknown | no evidenc | 74 |    |
| DO23186  | unknown | relapse    | 77 |    |
| DO231862 | unknown | no evidenc | 75 |    |
| DO231866 | unknown | no evidenc | 81 |    |
| DO231868 | unknown | no evidenc | 53 |    |
| DO231871 | unknown | no evidenc | 61 |    |
| DO231875 | unknown | no evidenc | 66 |    |
| DO23188  | unknown | no evidenc | 76 |    |
| DO231880 | unknown | no evidenc | 51 |    |
| DO231885 | unknown | no evidenc | 69 |    |
| DO231887 | unknown | no evidenc | 64 |    |
| DO231890 | unknown | no evidenc | 80 |    |
| DO231893 | unknown | no evidenc | 74 |    |
| DO231895 | unknown | no evidenc | 70 |    |
| DO231897 | unknown | no evidenc | 62 |    |
| DO23190  | unknown | relapse    | 40 |    |
| DO231900 | unknown | no evidenc | 79 |    |
| DO231902 | unknown | no evidenc | 63 |    |
| DO231904 | unknown | no evidenc | 76 |    |
| DO231906 | unknown | no evidenc | 72 |    |
| DO231909 | unknown | no evidenc | 68 |    |
| DO231910 | unknown | no evidenc | 63 |    |
| DO23192  | unknown | no evidenc | 85 |    |
| DO231933 | unknown |            | 67 | 67 |
| DO231934 | unknown |            | 62 | 62 |
| DO231935 | unknown |            | 42 | 42 |
| DO231936 | unknown |            | 45 | 45 |
| DO231937 | unknown |            | 65 | 65 |
| DO231938 | unknown |            | 64 | 64 |
| DO231939 | unknown |            | 55 | 55 |
| DO23194  | unknown | relapse    | 68 |    |
| DO231940 | unknown |            | 47 | 47 |
| DO231941 | unknown |            | 53 | 53 |
| DO231942 | unknown |            | 61 | 61 |
| DO231943 | unknown |            | 41 | 41 |
| DO231944 | unknown |            | 53 | 53 |
| DO231945 | unknown |            | 72 | 72 |
| DO231946 | unknown |            | 45 | 45 |
| DO231947 | unknown |            | 33 | 33 |
| DO231948 | unknown |            | 58 | 58 |
| DO231949 | unknown |            | 46 | 46 |

|          |         |            |    |    |
|----------|---------|------------|----|----|
| DO231950 | unknown |            | 36 | 36 |
| DO231951 | unknown |            | 67 | 67 |
| DO231952 | unknown |            | 36 | 36 |
| DO231953 | unknown |            | 39 | 39 |
| DO231954 | unknown |            | 62 | 62 |
| DO231955 | unknown |            | 37 | 37 |
| DO231956 | unknown |            | 58 | 58 |
| DO231957 | unknown |            | 55 | 55 |
| DO231958 | unknown |            | 57 | 57 |
| DO231959 | unknown |            | 47 | 47 |
| DO23196  | unknown | relapse    | 67 |    |
| DO231960 | unknown |            | 64 | 64 |
| DO231961 | unknown |            | 45 | 45 |
| DO231962 | unknown |            | 52 | 52 |
| DO231963 | unknown |            | 71 | 71 |
| DO231964 | unknown |            | 43 | 43 |
| DO231965 | unknown |            | 48 | 48 |
| DO231966 | unknown |            | 24 | 24 |
| DO231967 | unknown |            | 66 | 66 |
| DO231968 | unknown |            | 52 | 52 |
| DO231969 | unknown |            | 48 | 48 |
| DO231970 | unknown |            | 53 | 53 |
| DO231971 | unknown |            | 67 | 67 |
| DO231972 | unknown |            | 34 | 34 |
| DO231973 | unknown |            | 54 | 54 |
| DO231974 | unknown |            | 60 | 60 |
| DO231975 | unknown |            | 58 | 58 |
| DO231976 | unknown |            | 50 | 50 |
| DO231977 | unknown |            | 55 | 55 |
| DO231978 | unknown |            | 56 | 56 |
| DO231979 | unknown |            | 77 | 77 |
| DO23198  | unknown | relapse    | 50 |    |
| DO231980 | unknown |            | 68 | 68 |
| DO231981 | unknown |            | 73 | 73 |
| DO231982 | unknown |            | 75 | 75 |
| DO231983 | unknown |            | 71 | 71 |
| DO231984 | unknown |            | 66 | 66 |
| DO231985 | unknown |            | 62 | 62 |
| DO231986 | unknown |            | 77 | 77 |
| DO231987 | unknown |            | 62 | 62 |
| DO231988 | unknown |            | 54 | 54 |
| DO231989 | unknown |            | 67 | 67 |
| DO231990 | unknown |            | 62 | 62 |
| DO231991 | unknown |            | 66 | 66 |
| DO231992 | unknown |            | 47 | 47 |
| DO231993 | unknown |            | 55 | 55 |
| DO231995 | unknown |            | 56 | 56 |
| DO231998 | unknown |            | 45 | 45 |
| DO23200  | unknown | no evidenc | 81 |    |
| DO232000 | unknown |            | 67 | 67 |
| DO232002 | unknown |            | 72 | 72 |
| DO232004 | unknown |            | 58 | 58 |
| DO232005 | unknown |            | 48 | 48 |
| DO232008 | unknown |            | 62 | 62 |
| DO232010 | unknown |            | 47 | 47 |
| DO232012 | unknown |            | 61 | 61 |
| DO232014 | unknown |            | 80 | 80 |
| DO232019 | unknown |            | 59 | 59 |

|          |         |            |    |    |
|----------|---------|------------|----|----|
| DO23202  | unknown | no evidenc | 77 |    |
| DO232020 | unknown |            | 57 | 57 |
| DO232021 | unknown |            | 54 | 54 |
| DO232022 | unknown |            | 53 | 53 |
| DO232023 | unknown |            | 43 | 43 |
| DO232024 | unknown |            | 48 | 48 |
| DO232025 | unknown |            | 46 | 46 |
| DO232026 | unknown |            | 67 | 67 |
| DO232027 | unknown |            | 70 | 70 |
| DO232028 | unknown |            | 62 | 62 |
| DO232029 | unknown |            | 53 | 53 |
| DO232030 | unknown |            | 64 | 64 |
| DO232031 | unknown |            | 59 | 59 |
| DO232032 | unknown |            | 53 | 53 |
| DO232033 | unknown |            | 64 | 64 |
| DO232034 | unknown |            | 48 | 48 |
| DO232035 | unknown |            | 58 | 58 |
| DO23204  | unknown | no evidenc | 83 |    |
| DO23206  | unknown | relapse    | 84 |    |
| DO23208  | unknown | relapse    | 72 |    |
| DO23210  | unknown | no evidenc | 72 |    |
| DO23212  | unknown | relapse    | 67 |    |
| DO23214  | unknown | no evidenc | 75 |    |
| DO23216  | unknown | relapse    | 71 |    |
| DO23218  | unknown | relapse    | 62 |    |
| DO23220  | unknown | no evidenc | 36 |    |
| DO23222  | unknown | no evidenc | 76 |    |
| DO23224  | unknown | relapse    | 70 |    |
| DO23226  | unknown | no evidenc | 67 |    |
| DO23228  | unknown | no evidenc | 46 |    |
| DO23230  | unknown | relapse    | 58 |    |
| DO23232  | unknown | relapse    | 74 |    |
| DO23234  | unknown | relapse    | 65 |    |
| DO23236  | unknown | relapse    | 51 |    |
| DO23238  | unknown | no evidenc | 69 |    |
| DO23240  | unknown | no evidenc | 60 |    |
| DO23242  | unknown | relapse    | 62 |    |
| DO23244  | unknown | relapse    | 72 |    |
| DO23246  | unknown | relapse    | 77 |    |
| DO23248  | unknown | no evidenc | 81 |    |
| DO23250  | unknown | relapse    | 73 |    |
| DO23252  | unknown | no evidenc | 57 |    |
| DO23254  | unknown | relapse    | 68 |    |
| DO23256  | unknown | no evidenc | 58 |    |
| DO23258  | unknown | no evidenc | 67 |    |
| DO23260  | unknown | relapse    | 69 |    |
| DO23262  | unknown | no evidenc | 75 |    |
| DO23264  | unknown | relapse    | 61 |    |
| DO23266  | unknown | no evidenc | 71 |    |
| DO23268  | unknown | relapse    | 85 |    |
| DO23270  | unknown | relapse    | 61 |    |
| DO23272  | unknown | relapse    | 72 |    |
| DO23274  | unknown | relapse    | 75 |    |
| DO23276  | unknown | relapse    | 79 |    |
| DO23278  | unknown | relapse    | 57 |    |
| DO23280  | unknown | relapse    | 74 |    |
| DO23282  | unknown | no evidenc | 81 |    |
| DO23284  | unknown | no evidenc | 68 |    |

|         |         |            |    |
|---------|---------|------------|----|
| DO23286 | unknown | no evidenc | 62 |
| DO23288 | unknown | no evidenc | 60 |
| DO23290 | unknown | no evidenc | 68 |
| DO23292 | unknown | relapse    | 69 |
| DO23294 | unknown |            |    |
| DO23296 | unknown | relapse    | 66 |
| DO23298 | unknown | relapse    | 66 |
| DO23300 | unknown | relapse    | 71 |
| DO23302 | unknown | relapse    | 72 |
| DO23304 | unknown | relapse    | 50 |
| DO23306 | unknown | relapse    | 57 |
| DO23308 | unknown | relapse    | 66 |
| DO23310 | unknown | no evidenc | 54 |
| DO23312 | unknown | relapse    | 73 |
| DO23314 | unknown | no evidenc | 29 |
| DO23316 | unknown | relapse    | 70 |
| DO23318 | unknown | relapse    | 56 |
| DO23320 | unknown | relapse    | 60 |
| DO23322 | unknown | no evidenc | 78 |
| DO23324 | unknown | no evidenc | 70 |
| DO23326 | unknown | relapse    | 66 |
| DO23328 | unknown | no evidenc | 74 |
| DO23330 | unknown | no evidenc | 75 |
| DO23332 | unknown | no evidenc | 61 |
| DO23334 | unknown | relapse    | 45 |
| DO23336 | unknown | relapse    | 62 |
| DO23338 | unknown |            |    |
| DO23340 | unknown | relapse    | 56 |
| DO23342 | unknown | relapse    | 70 |
| DO23344 | unknown | relapse    | 72 |
| DO23346 | unknown | relapse    | 72 |
| DO23348 | unknown | relapse    | 77 |
| DO23350 | unknown | relapse    | 65 |
| DO23352 | unknown | relapse    | 58 |
| DO23354 | unknown | no evidenc | 29 |
| DO23356 | unknown | relapse    | 62 |
| DO23358 | unknown | relapse    | 71 |
| DO23360 | unknown | no evidenc | 71 |
| DO23362 | unknown | relapse    | 59 |
| DO23364 | unknown | relapse    | 51 |
| DO23366 | unknown | relapse    | 64 |
| DO23368 | unknown | relapse    | 52 |
| DO23370 | unknown | relapse    | 59 |
| DO23372 | unknown | relapse    | 23 |
| DO23374 | unknown | relapse    | 62 |
| DO23376 | unknown | relapse    | 58 |
| DO23378 | unknown | relapse    | 57 |
| DO23380 | unknown | relapse    | 54 |
| DO23382 | unknown | no evidenc | 65 |
| DO23384 | unknown | relapse    | 61 |
| DO23386 | unknown | relapse    | 47 |
| DO23388 | unknown |            | 72 |
| DO23390 | unknown | relapse    | 66 |
| DO23392 | unknown | relapse    | 70 |
| DO23394 | unknown | no evidenc | 59 |
| DO23396 | unknown | no evidenc | 72 |
| DO23398 | unknown | relapse    | 69 |
| DO23400 | unknown | relapse    | 41 |

|         |         |            |    |    |
|---------|---------|------------|----|----|
| DO23402 | unknown | relapse    | 37 |    |
| DO23404 | unknown | relapse    | 68 |    |
| DO23406 | unknown | relapse    | 52 |    |
| DO23408 | unknown | relapse    | 73 |    |
| DO23410 | unknown | relapse    | 70 |    |
| DO23412 | unknown | relapse    | 68 |    |
| DO23414 | unknown | relapse    | 62 |    |
| DO23416 | unknown | no evidenc | 73 |    |
| DO23418 | unknown | relapse    | 69 |    |
| DO23420 | unknown | no evidenc | 58 |    |
| DO23422 | unknown | no evidenc | 70 |    |
| DO23424 | unknown | relapse    | 51 |    |
| DO23426 | unknown | relapse    | 57 |    |
| DO23428 | unknown | relapse    | 76 |    |
| DO23430 | unknown | relapse    | 29 |    |
| DO23432 | unknown | relapse    | 66 |    |
| DO23434 | unknown | relapse    | 70 |    |
| DO23436 | unknown | relapse    | 51 |    |
| DO23438 | unknown | relapse    | 36 |    |
| DO23440 | unknown | relapse    | 52 |    |
| DO23442 | unknown |            | 70 |    |
| DO23444 | unknown |            | 77 |    |
| DO23446 | unknown |            | 47 |    |
| DO23448 | unknown |            | 69 |    |
| DO23450 | unknown |            | 70 |    |
| DO23452 | unknown |            | 71 |    |
| DO23454 | unknown |            | 69 |    |
| DO23456 | unknown |            | 67 |    |
| DO23458 | unknown |            | 63 |    |
| DO23460 | unknown |            | 77 |    |
| DO23462 | unknown |            | 62 |    |
| DO23464 | unknown |            | 25 |    |
| DO23466 | unknown |            | 73 |    |
| DO23468 | unknown |            | 48 |    |
| DO23470 | unknown |            | 76 |    |
| DO23472 | unknown |            | 70 |    |
| DO23474 | unknown |            | 69 |    |
| DO23476 | unknown |            | 53 |    |
| DO23478 | unknown |            | 59 |    |
| DO23480 | unknown |            | 65 |    |
| DO23482 | unknown |            | 58 |    |
| DO23484 | unknown |            | 59 |    |
| DO23486 | unknown |            | 74 |    |
| DO23488 | unknown |            | 73 |    |
| DO23490 | unknown |            | 79 |    |
| DO23492 | unknown |            | 64 |    |
| DO23494 | unknown |            | 69 |    |
| DO23496 | unknown |            | 58 |    |
| DO23498 | unknown |            | 68 |    |
| DO23500 | unknown |            | 78 |    |
| DO23502 | unknown |            | 68 |    |
| DO23504 | unknown |            | 72 |    |
| DO23506 | unknown |            | 75 |    |
| DO23508 | no      |            | 79 | 79 |
| DO23509 | no      |            | 60 | 60 |
| DO23510 | yes     |            | 80 | 80 |
| DO23511 | no      |            | 83 | 83 |
| DO23512 | no      |            | 60 | 60 |



|         |         |            |    |    |    |
|---------|---------|------------|----|----|----|
| DO23513 | no      |            | 76 | 76 |    |
| DO23514 | no      |            | 64 | 64 |    |
| DO23515 | yes     | C16        | 71 | 71 |    |
| DO23516 | no      |            | 69 | 69 |    |
| DO23517 | yes     |            | 62 | 62 |    |
| DO23518 | no      |            | 67 | 67 |    |
| DO23519 | no      |            | 65 | 65 |    |
| DO23520 | unknown |            | 59 | 59 |    |
| DO23521 | no      |            | 63 | 63 |    |
| DO23522 | no      |            | 82 | 82 |    |
| DO23523 | yes     |            | 52 | 52 |    |
| DO23524 | no      | C50        | 71 | 71 |    |
| DO23525 | no      |            | 71 | 71 |    |
| DO23526 | no      |            | 66 | 66 |    |
| DO23527 | no      |            | 72 | 72 |    |
| DO23528 | yes     |            | 45 | 45 |    |
| DO23529 | no      |            | 72 | 72 |    |
| DO23530 | no      |            | 53 | 53 |    |
| DO23531 | no      |            | 78 | 78 |    |
| DO23532 | yes     |            | 71 | 71 |    |
| DO23533 | no      |            | 61 | 61 |    |
| DO23534 | no      |            | 60 | 60 |    |
| DO23535 | no      |            | 67 | 67 |    |
| DO23536 | no      |            | 56 | 56 |    |
| DO23537 | no      | C16        | 79 | 79 |    |
| DO23538 | no      |            | 67 | 67 |    |
| DO23539 | unknown | C62        | 77 | 77 |    |
| DO23540 | no      |            | 73 | 73 |    |
| DO23541 | no      |            | 65 | 65 |    |
| DO23542 | yes     |            | 66 | 66 |    |
| DO23543 | no      |            | 63 | 63 |    |
| DO23544 | no      |            | 67 | 67 |    |
| DO23545 | no      | C16        | 67 | 67 |    |
| DO23546 | unknown |            | 63 | 63 |    |
| DO23547 | no      |            | 74 | 74 |    |
| DO23548 | yes     |            | 78 | 78 |    |
| DO23549 | no      |            | 74 | 74 |    |
| DO23550 | no      |            | 69 | 69 |    |
| DO23551 | no      |            | 73 | 73 |    |
| DO23552 | no      |            | 80 | 80 |    |
| DO44627 | unknown | relapse    | 74 | 74 | 74 |
| DO44628 | unknown | relapse    | 35 | 35 | 37 |
| DO44630 | unknown | relapse    | 63 | 63 | 64 |
| DO44632 | unknown | relapse    | 30 | 30 | 30 |
| DO44634 | unknown |            | 35 | 35 |    |
| DO44636 | unknown | relapse    | 64 | 64 | 69 |
| DO44638 | unknown | relapse    | 67 | 67 | 69 |
| DO44642 | unknown | relapse    | 38 | 38 | 39 |
| DO44644 | unknown | relapse    | 56 | 56 | 57 |
| DO44648 | unknown | complete r | 56 | 56 | 60 |
| DO44650 | unknown | complete r | 61 | 61 | 62 |
| DO44652 | unknown |            | 69 | 69 |    |
| DO44654 | unknown | relapse    | 40 | 40 | 42 |
| DO44656 | unknown | relapse    | 68 | 68 | 70 |
| DO44658 | unknown | complete r | 76 | 76 | 76 |
| DO44660 | unknown | relapse    | 56 | 56 | 59 |
| DO44664 | unknown | relapse    | 68 | 68 | 71 |
| DO44666 | unknown |            | 73 | 73 |    |

|         |         |            |    |    |    |
|---------|---------|------------|----|----|----|
| DO44668 | unknown |            | 69 | 69 |    |
| DO44670 | unknown | complete r | 78 | 78 | 81 |
| DO44672 | unknown |            | 75 | 75 |    |
| DO44674 | unknown |            | 74 | 74 |    |
| DO44676 | unknown |            | 68 | 68 |    |
| DO44678 | unknown | complete r | 66 | 66 | 69 |
| DO44680 | unknown |            | 79 | 79 |    |
| DO44682 | unknown | complete r | 65 | 65 | 68 |
| DO44684 | unknown | relapse    | 77 | 77 | 83 |
| DO44686 | unknown | complete r | 78 | 78 | 78 |
| DO44688 | unknown | relapse    | 60 | 60 | 61 |
| DO44692 | unknown | complete r | 44 | 44 | 56 |
| DO44694 | unknown | relapse    | 60 | 60 | 69 |
| DO44696 | unknown |            | 53 | 53 |    |
| DO44698 | unknown | relapse    | 68 | 68 | 74 |
| DO44700 | unknown | relapse    | 40 | 40 | 42 |
| DO44704 | unknown | relapse    | 63 | 63 | 66 |
| DO44706 | unknown | relapse    | 73 | 73 | 79 |
| DO44708 | unknown |            | 67 | 67 |    |
| DO44710 | unknown | relapse    | 42 | 42 | 43 |
| DO44712 | unknown | complete r | 68 | 68 | 75 |
| DO44714 | unknown |            | 62 | 62 |    |
| DO44716 | unknown | relapse    | 60 | 60 | 63 |
| DO44718 | unknown | complete r | 71 | 71 | 78 |
| DO44724 | unknown | relapse    | 67 | 67 | 72 |
| DO44726 | unknown | relapse    | 62 | 62 | 64 |
| DO44728 | unknown | complete r | 65 | 65 | 67 |
| DO44740 | unknown |            | 73 | 73 |    |
| DO44744 | unknown | relapse    | 46 | 46 | 47 |
| DO44748 | unknown | relapse    | 80 | 80 | 81 |
| DO44752 | unknown | relapse    | 69 | 69 | 70 |
| DO44754 | unknown |            | 69 | 69 |    |
| DO44756 | unknown | complete r | 42 | 42 | 42 |
| DO44764 | unknown | complete r | 66 | 66 | 70 |
| DO44766 | unknown | complete r | 26 | 26 | 27 |
| DO44768 | unknown | complete r | 21 | 21 | 22 |
| DO44772 | unknown | relapse    | 70 | 70 | 75 |
| DO44774 | unknown | relapse    | 63 | 63 | 64 |
| DO44776 | unknown | relapse    | 34 | 34 | 35 |
| DO44780 | unknown |            | 67 | 67 |    |
| DO44782 | unknown | relapse    | 62 | 62 | 64 |
| DO44784 | unknown | complete r | 56 | 56 | 63 |
| DO44786 | unknown | relapse    | 78 | 78 | 82 |
| DO44788 | unknown |            | 72 | 72 |    |
| DO44790 | unknown | complete r | 74 | 74 | 74 |
| DO44792 | unknown |            | 77 | 77 |    |
| DO44794 | unknown |            | 68 | 68 |    |
| DO44796 | unknown | complete r | 54 | 54 | 59 |
| DO44798 | unknown |            | 69 | 69 |    |
| DO44800 | unknown |            | 43 | 43 |    |
| DO44802 | unknown |            | 71 | 71 |    |
| DO44804 | unknown | relapse    | 69 | 69 | 72 |
| DO44806 | unknown | complete r | 65 | 65 | 65 |
| DO44808 | unknown |            | 74 | 74 |    |
| DO44810 | unknown | complete r | 49 | 49 | 53 |
| DO44812 | unknown |            | 63 | 63 |    |
| DO44818 | unknown | relapse    | 26 | 26 | 31 |
| DO44822 | unknown | relapse    | 67 | 67 | 70 |

|          |         |            |    |    |    |
|----------|---------|------------|----|----|----|
| DO44824  | unknown | relapse    | 28 | 28 | 28 |
| DO44828  | unknown | relapse    | 65 | 65 | 70 |
| DO44830  | unknown | relapse    | 50 | 50 | 51 |
| DO44832  | unknown |            | 70 | 70 |    |
| DO44834  | unknown | relapse    | 71 | 71 | 77 |
| DO44836  | unknown | relapse    | 59 | 59 | 61 |
| DO44840  | unknown | relapse    | 77 | 77 | 78 |
| DO44846  | unknown |            | 60 | 60 |    |
| DO44848  | unknown |            | 61 | 61 |    |
| DO44854  | unknown |            | 61 | 61 |    |
| DO44856  | unknown |            | 73 | 73 |    |
| DO44858  | unknown | complete r | 73 | 73 | 74 |
| DO44862  | unknown |            | 73 | 73 |    |
| DO44864  | unknown |            | 70 | 70 |    |
| DO44868  | unknown |            | 57 | 57 |    |
| DO223920 | unknown | progressio | 43 |    | 46 |
| DO223921 | unknown | complete r | 49 |    | 51 |
| DO223922 | unknown | progressio | 16 |    | 18 |
| DO223924 | unknown | complete r | 58 |    | 60 |
| DO22835  | unknown |            | 67 |    | 67 |
| DO22836  | unknown | progressio | 72 |    | 77 |
| DO22839  | unknown | complete r | 61 |    | 61 |
| DO22845  | unknown | complete r | 80 |    | 80 |
| DO22848  | unknown | complete r | 52 |    | 52 |
| DO22854  | unknown | complete r | 70 |    | 70 |
| DO22857  | unknown | progressio | 73 |    | 73 |
| DO22860  | unknown | complete r | 61 |    | 61 |
| DO22863  | unknown | complete r | 63 |    | 66 |
| DO22866  | unknown | complete r | 68 |    | 68 |
| DO22872  | unknown | complete r | 71 |    | 71 |
| DO22875  | unknown | complete r | 44 |    | 44 |
| DO22878  | unknown | complete r | 53 |    | 53 |
| DO22881  | unknown | complete r | 48 |    | 48 |
| DO22884  | unknown | complete r | 45 |    | 48 |
| DO22893  | unknown | complete r | 54 |    | 54 |
| DO22896  | unknown | complete r | 75 |    | 76 |
| DO22899  | unknown | progressio | 68 |    | 68 |
| DO22902  | unknown | complete r | 76 |    | 76 |
| DO22905  | unknown |            | 77 |    | 78 |
| DO22914  | unknown | complete r | 81 |    | 81 |
| DO22917  | unknown | complete r | 69 |    | 70 |
| DO22920  | unknown | progressio | 55 |    | 59 |
| DO22923  | unknown | progressio | 68 |    | 74 |
| DO22929  | unknown | complete r | 62 |    | 65 |
| DO22932  | unknown | complete r | 46 |    | 46 |
| DO22935  | unknown | complete r | 73 |    | 73 |
| DO22950  | unknown | complete r | 62 |    | 62 |
| DO22953  | unknown | complete r | 67 |    | 67 |
| DO22959  | unknown | complete r | 46 |    | 46 |
| DO22970  | unknown | complete r | 79 |    | 80 |
| DO22974  | unknown | progressio | 73 |    | 73 |
| DO22978  | unknown | complete r | 38 |    | 38 |
| DO22982  | unknown |            | 20 |    | 21 |
| DO22986  | unknown | progressio | 23 |    | 25 |
| DO22990  | unknown | complete r | 66 |    | 66 |
| DO22994  | unknown | progressio | 71 |    | 73 |
| DO22998  | unknown | complete r | 68 |    | 72 |
| DO23018  | unknown | progressio | 64 |    | 64 |

|         |         |            |    |    |
|---------|---------|------------|----|----|
| DO23023 | unknown |            | 52 | 52 |
| DO23028 | unknown | complete r | 50 | 50 |
| DO23033 | unknown | complete r | 73 | 76 |
| DO23038 | unknown | complete r | 24 | 24 |
| DO23053 | unknown | complete r | 71 | 71 |
| DO23058 | unknown | complete r | 61 | 61 |
| DO23068 | unknown | complete r | 36 | 36 |
| DO23078 | unknown | complete r | 58 | 58 |
| DO44872 | unknown | complete r | 70 | 72 |
| DO44873 | unknown | complete r | 54 | 55 |
| DO44874 | unknown | complete r | 51 | 51 |
| DO45029 | yes     | no evidenc | 73 |    |
| DO45031 | no      | relapse    | 66 |    |
| DO45033 | unknown | relapse    | 62 |    |
| DO45035 | yes     | relapse    | 58 |    |
| DO45037 | no      | relapse    | 67 |    |
| DO45039 | yes     | relapse    | 58 |    |
| DO45041 | unknown | no evidenc | 69 |    |
| DO45043 | yes     | relapse    | 56 |    |
| DO45045 | yes     | relapse    | 57 |    |
| DO45047 | yes     | relapse    | 40 |    |
| DO45049 | yes     | relapse    | 73 |    |
| DO45051 | unknown | relapse    | 57 |    |
| DO45053 | no      | no evidenc | 47 |    |
| DO45055 | no      | relapse    | 60 |    |
| DO45057 | yes     | relapse    | 65 |    |
| DO45059 | no      | relapse    | 49 |    |
| DO45061 | no      | relapse    | 53 |    |
| DO45064 | unknown | relapse    | 66 |    |
| DO45065 | no      | relapse    | 41 |    |
| DO45067 | no      | relapse    | 66 |    |
| DO45069 | unknown | relapse    | 58 |    |
| DO45071 | yes     | relapse    | 58 |    |
| DO45073 | no      | relapse    | 50 |    |
| DO45075 | unknown | no evidenc | 66 |    |
| DO45077 | no      | relapse    | 66 |    |
| DO45079 | unknown | no evidenc | 59 |    |
| DO45081 | yes     | relapse    | 63 |    |
| DO45083 | no      | relapse    | 62 |    |
| DO45085 | no      | relapse    | 68 |    |
| DO45087 | yes     | relapse    | 56 |    |
| DO45089 | yes     | relapse    | 45 |    |
| DO45091 | no      |            | 56 | 56 |
| DO45092 | no      |            | 62 | 62 |
| DO45093 | no      |            | 71 | 71 |
| DO45094 | no      |            | 76 | 76 |
| DO45095 | no      |            | 66 | 66 |
| DO45096 | no      |            | 69 | 69 |
| DO45097 | no      |            | 69 | 69 |
| DO45099 | unknown |            | 46 | 46 |
| DO45101 | unknown |            | 63 | 63 |
| DO45103 | yes     |            | 47 | 47 |
| DO45105 | unknown |            | 61 | 61 |
| DO45107 | yes     |            | 63 | 63 |
| DO45109 | no      |            | 63 | 63 |
| DO45111 | yes     |            | 74 | 74 |
| DO45113 | yes     |            | 58 | 58 |
| DO45115 | no      | C67        | 81 | 81 |

|         |         |     |    |    |
|---------|---------|-----|----|----|
| DO45117 | yes     |     | 73 | 73 |
| DO45119 | yes     | C15 | 74 | 74 |
| DO45121 | no      |     | 61 | 61 |
| DO45123 | yes     |     | 78 | 78 |
| DO45125 | no      |     | 58 | 58 |
| DO45127 | no      |     | 73 | 73 |
| DO45129 | yes     |     | 61 | 61 |
| DO45131 | yes     |     | 53 | 53 |
| DO45133 | yes     |     | 64 | 64 |
| DO45135 | yes     |     | 77 | 77 |
| DO45137 | yes     |     | 38 | 38 |
| DO45139 | yes     |     | 63 | 63 |
| DO45141 | no      |     | 73 | 73 |
| DO45143 | no      |     | 69 | 69 |
| DO45145 | no      |     | 78 | 78 |
| DO45147 | yes     |     | 57 | 57 |
| DO45149 | no      |     | 70 | 70 |
| DO45151 | no      |     | 64 | 64 |
| DO45153 | no      |     | 77 | 77 |
| DO45155 | yes     | C67 | 69 | 69 |
| DO45157 | no      |     | 62 | 62 |
| DO45159 | no      |     | 65 | 65 |
| DO45161 | no      | C18 | 74 | 74 |
| DO45163 | yes     |     | 76 | 76 |
| DO45165 | yes     |     | 75 | 75 |
| DO45167 | yes     |     | 67 | 67 |
| DO45169 | no      |     | 74 | 74 |
| DO45171 | unknown |     | 56 | 56 |
| DO45173 | yes     |     | 63 | 63 |
| DO45175 | yes     |     | 74 | 74 |
| DO45177 | no      |     | 81 | 81 |
| DO45179 | yes     |     | 78 | 78 |
| DO45181 | yes     |     | 84 | 84 |
| DO45183 | no      |     | 72 | 72 |
| DO45185 | unknown |     | 89 | 89 |
| DO45187 | unknown |     | 32 | 32 |
| DO45189 | yes     |     | 85 | 85 |
| DO45191 | yes     |     | 61 | 61 |
| DO45193 | no      | C16 | 68 | 68 |
| DO45195 | no      |     | 62 | 62 |
| DO45197 | no      |     | 51 | 51 |
| DO45199 | no      |     | 86 | 86 |
| DO45201 | yes     |     | 49 | 49 |
| DO45203 | no      |     | 71 | 71 |
| DO45205 | yes     |     | 67 | 67 |
| DO45207 | no      |     | 68 | 68 |
| DO45209 | yes     |     | 70 | 70 |
| DO45211 | no      |     | 76 | 76 |
| DO45213 | yes     |     | 58 | 58 |
| DO45215 | yes     |     | 65 | 65 |
| DO45217 | no      |     | 69 | 69 |
| DO45219 | no      |     | 78 | 78 |
| DO45221 | no      |     | 75 | 75 |
| DO45223 | no      |     | 67 | 67 |
| DO45225 | no      |     | 69 | 69 |
| DO45227 | no      |     | 57 | 57 |
| DO45229 | no      |     | 74 | 74 |
| DO45231 | no      |     | 84 | 84 |

|         |         |            |    |    |    |
|---------|---------|------------|----|----|----|
| DO45233 | no      | C67        | 83 | 83 |    |
| DO45235 | no      |            | 68 | 68 |    |
| DO45237 | no      |            | 58 | 58 |    |
| DO45239 | no      |            | 42 | 42 |    |
| DO45241 | yes     |            | 49 | 49 |    |
| DO45243 | no      |            | 74 | 74 |    |
| DO45245 | unknown | C16        | 75 | 75 |    |
| DO45247 | no      |            | 31 | 31 |    |
| DO45249 | yes     |            | 57 | 57 |    |
| DO45251 | no      |            | 57 | 57 |    |
| DO45253 | yes     |            | 50 | 50 |    |
| DO45255 | yes     |            | 81 | 81 |    |
| DO45257 | no      |            | 46 | 46 |    |
| DO45259 | no      |            | 65 | 65 |    |
| DO45261 | no      |            | 74 | 74 |    |
| DO45263 | no      |            | 67 | 67 |    |
| DO45265 | no      |            | 73 | 73 |    |
| DO45267 | yes     |            | 73 | 73 |    |
| DO45269 | no      |            | 59 | 59 |    |
| DO45273 | no      |            | 62 | 62 |    |
| DO45275 | no      |            | 65 | 65 |    |
| DO45277 | no      |            | 64 | 64 |    |
| DO45279 | no      |            | 67 | 67 |    |
| DO45281 | no      |            | 83 | 83 |    |
| DO45283 | unknown | C15        | 60 | 60 |    |
| DO45285 | no      |            | 59 | 59 |    |
| DO45287 | no      | C20        | 74 | 74 |    |
| DO45289 | no      |            | 78 | 78 |    |
| DO45291 | no      |            | 69 | 69 |    |
| DO45293 | no      |            | 68 | 68 |    |
| DO45295 | no      |            | 76 | 76 |    |
| DO45297 | no      |            | 61 | 61 |    |
| DO45299 | unknown |            | 70 | 70 |    |
| DO45301 | unknown |            | 56 | 56 |    |
| DO45303 | unknown |            | 62 | 62 |    |
| DO45305 | no      |            | 66 | 66 |    |
| DO45307 | no      |            | 54 | 54 |    |
| DO45309 | no      |            | 73 | 73 |    |
| DO44876 | unknown | complete r | 61 |    | 66 |
| DO44877 | unknown | complete r | 52 |    | 52 |
| DO44880 | unknown | complete r | 69 |    | 69 |
| DO44885 | unknown | progressio | 77 |    | 78 |
| DO44886 | unknown | complete r | 60 |    | 60 |
| DO44890 | unknown | complete r | 51 |    | 51 |
| DO44892 | unknown | complete r | 35 |    | 35 |
| DO44895 | unknown | complete r | 60 |    | 60 |
| DO44907 | unknown | progressio | 65 |    | 66 |
| DO44911 | unknown | complete r | 78 |    | 83 |
| DO44919 | unknown | complete r | 80 |    | 80 |
| DO44927 | unknown | complete r | 64 |    | 64 |
| DO44930 | unknown | complete r | 67 |    | 69 |
| DO44934 | unknown | complete r | 46 |    | 50 |
| DO44938 | unknown | progressio | 59 |    | 59 |
| DO44946 | unknown | complete r | 45 |    | 45 |
| DO44950 | unknown | complete r | 72 |    | 73 |
| DO44958 | unknown | progressio | 32 |    | 39 |
| DO44962 | unknown | complete r | 69 |    | 69 |
| DO44966 | unknown | complete r | 84 |    | 84 |

|         |         |          |            |    |    |    |
|---------|---------|----------|------------|----|----|----|
| DO44974 | unknown |          | complete r | 47 |    | 47 |
| DO44978 | unknown |          | complete r | 70 |    | 70 |
| DO44986 | unknown |          | progressio | 56 |    | 61 |
| DO44998 | unknown |          | complete r | 58 |    | 58 |
| DO48672 | yes     | C34      |            | 81 | 81 |    |
| DO48674 | no      |          |            | 80 | 80 |    |
| DO48677 | unknown |          |            | 58 | 58 |    |
| DO48679 | no      |          |            | 72 | 72 |    |
| DO48681 | no      |          |            | 57 | 57 |    |
| DO48682 | yes     | C25      |            | 72 | 72 |    |
| DO48684 | no      | C50      |            | 71 | 71 |    |
| DO48686 | yes     |          |            | 75 | 75 |    |
| DO48687 | no      |          |            | 73 | 73 |    |
| DO48689 | no      |          |            | 63 | 63 |    |
| DO48691 | no      | C67      |            | 71 | 71 |    |
| DO48692 | no      |          |            | 77 | 77 |    |
| DO48693 | yes     |          |            | 71 | 71 |    |
| DO48694 | yes     |          |            | 71 | 71 |    |
| DO48695 | no      | C34      |            | 77 | 77 |    |
| DO48697 | no      |          |            | 64 | 64 |    |
| DO48700 | yes     |          |            | 78 | 78 |    |
| DO48701 | yes     |          |            | 78 | 78 |    |
| DO48703 | yes     |          |            | 64 | 64 |    |
| DO48704 | yes     |          |            | 68 | 68 |    |
| DO48706 | no      |          |            | 72 | 72 |    |
| DO48709 | no      |          |            | 74 | 74 |    |
| DO48712 | yes     |          |            | 50 | 50 |    |
| DO48715 | no      |          |            | 58 | 58 |    |
| DO48716 | yes     |          |            | 71 | 71 |    |
| DO48717 | yes     |          |            | 54 | 54 |    |
| DO48719 | no      |          |            | 80 | 80 |    |
| DO48720 | no      |          |            | 62 | 62 |    |
| DO48721 | yes     |          |            | 58 | 58 |    |
| DO48723 | yes     |          |            | 73 | 73 |    |
| DO48725 | no      |          |            | 66 | 66 |    |
| DO48727 | no      |          |            | 81 | 81 |    |
| DO48728 | yes     | D11      |            | 74 | 74 |    |
| DO48730 | no      |          |            | 73 | 73 |    |
| DO48732 | yes     |          |            | 73 | 73 |    |
| DO48733 | yes     |          |            | 72 | 72 |    |
| DO48736 | yes     |          |            | 76 | 76 |    |
| DO48737 | no      |          |            | 52 | 52 |    |
| DO48738 | no      |          |            | 83 | 83 |    |
| DO48741 | yes     |          |            | 64 | 64 |    |
| DO48742 | no      |          |            | 76 | 76 |    |
| DO48743 | no      | C50, C05 |            | 69 | 69 |    |
| DO48746 | no      |          |            | 76 | 76 |    |
| DO48747 | no      |          |            | 62 | 62 |    |
| DO48751 | no      |          |            | 68 | 68 |    |
| DO48753 | no      |          |            | 55 | 55 |    |
| DO48757 | no      |          |            | 68 | 68 |    |
| DO48759 | no      |          |            | 73 | 73 |    |
| DO48760 | no      |          |            | 70 | 70 |    |
| DO48761 | yes     |          |            | 55 | 55 |    |
| DO45005 | unknown |          | complete r | 58 |    | 58 |
| DO45009 | unknown |          | complete r | 76 |    | 76 |
| DO45013 | unknown |          | progressio | 65 |    | 70 |
| DO49660 | unknown |          |            | 64 | 64 |    |

|         |         |            |    |    |    |
|---------|---------|------------|----|----|----|
| DO49661 | unknown |            | 83 | 83 |    |
| DO49662 | unknown |            | 29 | 29 |    |
| DO49663 | unknown |            | 46 | 46 |    |
| DO49664 | unknown |            | 24 | 24 |    |
| DO49665 | unknown |            | 30 | 30 |    |
| DO49666 | unknown |            | 47 | 47 |    |
| DO49667 | unknown |            | 33 | 33 |    |
| DO49668 | unknown |            | 29 | 29 |    |
| DO49669 | unknown |            | 30 | 30 |    |
| DO49670 | unknown |            | 32 | 32 |    |
| DO49671 | unknown |            | 42 | 42 |    |
| DO49672 | unknown |            | 34 | 34 |    |
| DO49673 | unknown |            | 67 | 67 |    |
| DO49674 | unknown |            | 23 | 23 |    |
| DO49675 | unknown |            | 43 | 43 |    |
| DO49676 | unknown |            | 40 | 40 |    |
| DO49677 | unknown |            | 36 | 36 |    |
| DO49678 | unknown |            | 21 | 21 |    |
| DO49679 | unknown |            | 34 | 34 |    |
| DO49680 | unknown |            | 48 | 48 |    |
| DO49681 | unknown |            | 38 | 38 |    |
| DO45021 | unknown | complete r | 74 |    | 74 |
| DO49683 | unknown |            | 27 | 27 |    |
| DO49684 | unknown |            | 29 | 29 |    |
| DO49685 | unknown |            | 31 | 31 |    |
| DO49686 | unknown |            | 46 | 46 |    |
| DO49687 | unknown |            | 40 | 40 |    |
| DO49689 | unknown |            | 47 | 47 |    |
| DO49691 | unknown |            | 50 | 50 |    |
| DO49692 | unknown |            | 35 | 35 |    |
| DO45025 | unknown | complete r | 67 |    | 67 |
| DO48473 | unknown | complete r | 73 |    | 81 |
| DO48475 | unknown | progressio | 44 |    | 45 |
| DO48477 | unknown | complete r | 20 |    | 20 |
| DO48478 | unknown | complete r | 71 |    | 71 |
| DO48481 | unknown | complete r | 60 |    | 60 |
| DO48483 | unknown | complete r | 66 |    | 66 |
| DO48496 | unknown | complete r | 29 |    | 29 |
| DO48505 | unknown | complete r | 58 |    | 58 |
| DO48528 | unknown | complete r | 68 |    | 68 |
| DO48532 | unknown | complete r | 61 |    | 61 |
| DO48552 | unknown | complete r | 25 |    | 26 |
| DO48555 | unknown | complete r | 50 |    | 50 |
| DO48558 | unknown | complete r | 59 |    | 59 |
| DO48559 | unknown | progressio | 65 |    | 65 |
| DO48562 | unknown | complete r | 53 |    | 53 |
| DO48587 | unknown | complete r | 77 |    | 79 |
| DO48593 | unknown | complete r | 65 |    | 65 |
| DO48599 | unknown | complete r | 48 |    | 48 |
| DO48602 | unknown | complete r | 66 |    | 66 |
| DO49657 | unknown | progressio | 66 |    | 66 |
| DO50736 | unknown | relapse    | 59 | 59 | 59 |
| DO50737 | unknown | relapse    | 66 | 66 | 66 |
| DO50738 | unknown | relapse    | 72 | 72 | 72 |
| DO50739 | unknown | relapse    | 71 | 71 | 71 |
| DO50740 | unknown | relapse    | 59 | 59 | 59 |
| DO50741 | unknown | relapse    | 73 | 73 | 73 |
| DO50742 | unknown | relapse    | 51 | 51 | 51 |



|         |         |         |    |    |    |
|---------|---------|---------|----|----|----|
| DO50743 | unknown | relapse | 59 | 59 | 59 |
| DO50744 | unknown | relapse | 60 | 60 | 60 |
| DO50745 | unknown | relapse | 79 | 79 | 79 |
| DO50746 | unknown | relapse | 53 | 53 | 53 |
| DO50747 | unknown | relapse | 75 | 75 | 75 |
| DO50748 | unknown | relapse | 67 | 67 | 67 |
| DO50749 | unknown | relapse | 73 | 73 | 73 |
| DO50750 | unknown | relapse | 78 | 78 | 78 |
| DO50751 | unknown | relapse | 67 | 67 | 67 |
| DO50752 | unknown | relapse | 66 | 66 | 66 |
| DO50753 | unknown | relapse | 61 | 61 | 61 |
| DO50754 | unknown | relapse | 62 | 62 | 62 |
| DO50755 | unknown | relapse | 78 | 78 | 78 |
| DO50756 | unknown | relapse | 72 | 72 | 72 |
| DO50757 | unknown | relapse | 61 | 61 | 61 |
| DO50758 | unknown | relapse | 81 | 81 | 81 |
| DO50759 | unknown | relapse | 53 | 53 | 53 |
| DO50760 | unknown | relapse | 79 | 79 | 79 |
| DO50761 | unknown | relapse | 61 | 61 | 61 |
| DO50762 | unknown | relapse | 59 | 59 | 59 |
| DO50763 | unknown | relapse | 47 | 47 | 47 |
| DO50764 | unknown | relapse | 64 | 64 | 64 |
| DO50765 | unknown | relapse | 56 | 56 | 56 |
| DO50766 | unknown | relapse | 49 | 49 | 49 |
| DO50767 | unknown | relapse | 61 | 61 | 61 |
| DO50768 | unknown | relapse | 63 | 63 | 63 |
| DO50769 | unknown | relapse | 51 | 51 | 51 |
| DO50770 | unknown | relapse | 72 | 72 | 72 |
| DO50771 | unknown | relapse | 63 | 63 | 63 |
| DO50772 | no      |         | 70 | 70 |    |
| DO50773 | unknown | relapse | 50 | 50 | 50 |
| DO50774 | no      |         | 68 | 68 |    |
| DO50775 | unknown | relapse | 71 | 71 | 71 |
| DO50776 | no      | C61     | 75 | 75 |    |
| DO50777 | unknown | relapse | 75 | 75 | 75 |
| DO50778 | yes     |         | 60 | 60 |    |
| DO50779 | unknown | relapse | 63 | 63 | 63 |
| DO50780 | no      |         | 70 | 70 |    |
| DO50781 | unknown | relapse | 70 | 70 | 70 |
| DO50782 | unknown | relapse | 74 | 74 | 74 |
| DO50783 | no      | C66     | 62 | 62 |    |
| DO50784 | unknown | relapse | 69 | 69 | 69 |
| DO50785 | no      |         | 37 | 37 |    |
| DO50786 | unknown | relapse | 63 | 63 | 63 |
| DO50787 | no      |         | 63 | 63 |    |
| DO50788 | unknown | relapse | 61 | 61 | 61 |
| DO50789 | yes     | C16     | 73 | 73 |    |
| DO50790 | unknown | relapse | 62 | 62 | 62 |
| DO50791 | yes     |         | 79 | 79 |    |
| DO50792 | unknown | relapse | 62 | 62 | 62 |
| DO50793 | yes     | C16     | 76 | 76 |    |
| DO50794 | unknown | relapse | 66 | 66 | 66 |
| DO50795 | unknown | relapse | 63 | 63 | 63 |
| DO50796 | no      |         | 69 | 69 |    |
| DO50797 | unknown | relapse | 62 | 62 | 62 |
| DO50798 | no      |         | 77 | 77 |    |
| DO50799 | yes     |         | 66 | 66 |    |
| DO50800 | yes     |         | 74 | 74 |    |

|         |         |     |            |    |    |    |
|---------|---------|-----|------------|----|----|----|
| DO50802 | yes     | C18 |            | 49 | 49 |    |
| DO50803 | no      | C18 |            | 62 | 62 |    |
| DO50804 | unknown | C66 |            | 81 | 81 |    |
| DO50805 | no      | C61 |            | 72 | 72 |    |
| DO50806 | yes     |     |            | 70 | 70 |    |
| DO50807 | yes     |     |            | 67 | 67 |    |
| DO50808 | no      | C67 |            | 68 | 68 |    |
| DO50809 | yes     |     |            | 56 | 56 |    |
| DO50810 | unknown |     |            | 53 | 53 |    |
| DO50811 | no      |     |            | 62 | 62 |    |
| DO50812 | unknown |     | complete r | 62 | 62 | 65 |
| DO50813 | no      |     |            | 56 | 56 |    |
| DO50814 | no      |     |            | 83 | 83 |    |
| DO50815 | no      |     |            | 62 | 62 |    |
| DO50816 | no      |     |            | 63 | 63 |    |
| DO50817 | no      |     |            | 75 | 75 |    |
| DO50818 | no      |     |            | 65 | 65 |    |
| DO50819 | no      |     |            | 72 | 72 |    |
| DO50820 | no      |     |            | 77 | 77 |    |
| DO50821 | unknown |     | complete r | 60 | 60 | 65 |
| DO50822 | no      |     |            | 66 | 66 |    |
| DO50823 | unknown |     | complete r | 53 | 53 | 59 |
| DO50824 | unknown |     | complete r | 49 | 49 | 53 |
| DO50825 | no      |     |            | 70 | 70 |    |
| DO50826 | unknown |     |            | 57 | 57 |    |
| DO50827 | no      |     |            | 48 | 48 |    |
| DO50828 | unknown |     |            | 69 | 69 |    |
| DO50829 | yes     |     |            | 78 | 78 |    |
| DO50830 | unknown |     | relapse    | 63 | 63 | 63 |
| DO50831 | no      |     |            | 52 | 52 |    |
| DO50832 | yes     |     |            | 73 | 73 |    |
| DO50833 | unknown |     | relapse    | 63 | 63 | 72 |
| DO50834 | unknown |     |            | 72 | 72 |    |
| DO50835 | unknown |     |            | 65 | 65 |    |
| DO50836 | unknown |     | complete r | 52 | 52 | 58 |
| DO50837 | no      |     |            | 53 | 53 |    |
| DO50838 | unknown |     |            | 60 | 60 |    |
| DO50839 | yes     |     |            | 47 | 47 |    |
| DO50840 | no      |     |            | 49 | 49 |    |
| DO50841 | unknown |     | complete r | 56 | 56 | 62 |
| DO50842 | no      |     |            | 75 | 75 |    |
| DO50843 | unknown |     | relapse    | 58 | 58 | 66 |
| DO50844 | yes     |     |            | 75 | 75 |    |
| DO50845 | no      |     |            | 72 | 72 |    |
| DO50846 | unknown |     | relapse    | 72 | 72 | 73 |
| DO50847 | unknown |     |            | 60 | 60 |    |
| DO50848 | no      |     |            | 74 | 74 |    |
| DO50849 | unknown |     | relapse    | 66 | 66 | 67 |
| DO50850 | no      |     |            | 74 | 74 |    |
| DO50851 | no      |     |            | 80 | 80 |    |
| DO50852 | unknown |     |            | 44 | 44 |    |
| DO50853 | unknown |     |            | 32 | 32 |    |
| DO50854 | unknown |     |            | 64 | 64 |    |
| DO50855 | no      |     |            | 47 | 47 |    |
| DO50856 | unknown |     | relapse    | 78 | 78 | 78 |
| DO50857 | yes     |     |            | 72 | 72 |    |
| DO50858 | unknown |     |            | 67 | 67 |    |
| DO50859 | no      | C25 |            | 77 | 77 |    |

|         |         |            |    |    |    |
|---------|---------|------------|----|----|----|
| DO50860 | unknown |            | 45 | 45 |    |
| DO50861 | unknown |            | 77 | 77 |    |
| DO50862 | unknown | relapse    | 54 | 54 | 62 |
| DO50864 | unknown | relapse    | 68 | 68 | 71 |
| DO50865 | unknown |            | 71 | 71 |    |
| DO50866 | unknown | complete r | 84 | 84 | 90 |
| DO50867 | unknown |            | 60 | 60 |    |
| DO50868 | unknown | complete r | 69 | 69 | 74 |
| DO50869 | unknown |            | 76 | 76 |    |
| DO50871 | unknown | complete r | 74 | 74 | 81 |
| DO50872 | unknown | relapse    | 66 | 66 | 69 |
| DO50873 | unknown | relapse    | 41 | 41 | 41 |
| DO50874 | unknown |            | 76 | 76 |    |
| DO50875 | unknown |            | 69 | 69 |    |
| DO50877 | unknown | complete r | 75 | 75 | 78 |
| DO50879 | unknown |            | 71 | 71 |    |
| DO50880 | unknown |            | 78 | 78 |    |
| DO50881 | unknown |            | 56 | 56 |    |
| DO50882 | unknown | complete r | 75 | 75 | 75 |
| DO50883 | unknown |            | 77 | 77 |    |
| DO50884 | unknown | complete r | 59 | 59 | 61 |
| DO50885 | unknown |            | 75 | 75 |    |
| DO50886 | unknown |            | 64 | 64 |    |
| DO50888 | unknown | complete r | 63 | 63 | 66 |
| DO50889 | unknown |            | 43 | 43 |    |
| DO50890 | unknown | complete r | 53 | 53 | 57 |
| DO50891 | unknown | complete r | 60 | 60 | 61 |
| DO50892 | unknown | complete r | 72 | 72 | 76 |
| DO50893 | unknown |            | 72 | 72 |    |
| DO50894 | unknown |            | 50 | 50 |    |
| DO50895 | unknown | complete r | 57 | 57 | 60 |
| DO50897 | unknown | complete r | 80 | 80 | 81 |
| DO50898 | unknown |            | 83 | 83 |    |
| DO50899 | unknown |            | 55 | 55 |    |
| DO50900 | unknown |            | 49 | 49 |    |
| DO50901 | unknown | complete r | 76 | 76 | 81 |
| DO50902 | unknown |            | 58 | 58 |    |
| DO50903 | unknown |            | 73 | 73 |    |
| DO50904 | unknown | complete r | 68 | 68 | 74 |
| DO50905 | unknown |            | 55 | 55 |    |
| DO50906 | unknown |            | 57 | 57 |    |
| DO50907 | unknown |            | 67 | 67 |    |
| DO50908 | unknown | relapse    | 64 | 64 | 68 |
| DO50909 | unknown |            | 50 | 50 |    |
| DO50910 | unknown |            | 69 | 69 |    |
| DO50911 | unknown |            | 75 | 75 |    |
| DO50912 | unknown |            | 54 | 54 |    |
| DO50913 | unknown |            | 66 | 66 |    |
| DO50914 | unknown | relapse    | 52 | 52 | 60 |
| DO50915 | unknown | relapse    | 52 | 52 | 55 |
| DO50916 | unknown |            | 65 | 65 |    |
| DO50917 | unknown |            | 34 | 34 |    |
| DO50919 | unknown |            | 73 | 73 |    |
| DO50920 | unknown |            | 41 | 41 |    |
| DO50921 | unknown |            | 75 | 75 |    |
| DO50922 | unknown |            | 65 | 65 |    |
| DO50923 | unknown | complete r | 74 | 74 | 76 |
| DO50924 | unknown | relapse    | 80 | 80 | 81 |

|         |         |            |    |    |    |
|---------|---------|------------|----|----|----|
| DO50925 | unknown | relapse    | 69 | 69 | 72 |
| DO50926 | unknown | complete r | 21 | 21 | 24 |
| DO50927 | unknown |            | 65 | 65 |    |
| DO50928 | unknown | relapse    | 61 | 61 | 62 |
| DO50929 | unknown | complete r | 85 | 85 | 86 |
| DO50930 | unknown | relapse    | 73 | 73 | 74 |
| DO50931 | unknown |            | 57 | 57 |    |
| DO50932 | unknown | complete r | 58 | 58 | 59 |
| DO50933 | unknown |            | 56 | 56 |    |
| DO50934 | unknown |            | 48 | 48 |    |
| DO50935 | unknown |            | 61 | 61 |    |
| DO50936 | unknown |            | 75 | 75 |    |
| DO50937 | unknown | relapse    | 56 | 56 | 59 |
| DO50938 | unknown |            | 53 | 53 |    |
| DO50939 | unknown | complete r | 57 | 57 | 57 |
| DO50940 | unknown |            | 74 | 74 |    |
| DO50942 | unknown | relapse    | 48 | 48 | 48 |
| DO50944 | unknown |            | 90 | 90 |    |
| DO50946 | unknown |            | 53 | 53 |    |
| DO50947 | unknown | relapse    | 37 | 37 | 39 |
| DO50948 | unknown | complete r | 33 | 33 | 33 |
| DO50949 | unknown | complete r | 65 | 65 | 66 |
| DO50950 | unknown | relapse    | 62 | 62 | 63 |
| DO50951 | unknown |            | 68 | 68 |    |
| DO50952 | unknown |            | 65 | 65 |    |
| DO50953 | unknown |            | 49 | 49 |    |
| DO50954 | unknown |            | 70 | 70 |    |
| DO50955 | unknown | complete r | 75 | 75 | 81 |
| DO50956 | unknown | complete r | 17 | 17 | 23 |
| DO50957 | unknown | complete r | 55 | 55 | 61 |
| DO50958 | unknown | relapse    | 65 | 65 | 69 |
| DO50960 | unknown |            | 77 | 77 |    |
| DO50961 | unknown | relapse    | 54 | 54 | 55 |
| DO50962 | unknown |            | 76 | 76 |    |
| DO50963 | unknown | relapse    | 65 | 65 | 72 |
| DO50964 | unknown | complete r | 78 | 78 | 82 |
| DO50966 | unknown | complete r | 58 | 58 | 64 |
| DO50967 | unknown | relapse    | 80 | 80 | 84 |
| DO50968 | unknown |            | 75 | 75 |    |
| DO50969 | unknown |            | 71 | 71 |    |
| DO50970 | unknown |            | 72 | 72 |    |
| DO50971 | unknown | relapse    | 61 | 61 | 66 |
| DO50972 | unknown |            | 71 | 71 |    |
| DO50973 | unknown | complete r | 73 | 73 | 77 |
| DO50974 | unknown |            | 78 | 78 |    |
| DO50976 | unknown | relapse    | 74 | 74 | 74 |
| DO49658 | unknown | progressio | 66 |    | 66 |
| DO49659 | unknown | complete r | 63 |    | 63 |
| DO49682 | unknown | complete r | 54 |    | 54 |
| DO49693 | unknown | complete r | 65 |    | 65 |
| DO49697 | unknown | complete r | 64 |    | 64 |
| DO49698 | unknown | progressio | 61 |    | 62 |
| DO49699 | unknown | complete r | 79 |    | 79 |
| DO49701 | unknown | complete r | 48 |    | 48 |
| DO49703 | unknown | progressio | 68 |    | 68 |
| DO49705 | unknown | complete r | 64 |    | 64 |
| DO49707 | unknown | complete r | 61 |    | 61 |
| DO49709 | unknown | complete r | 63 |    | 64 |

|         |         |            |    |    |
|---------|---------|------------|----|----|
| DO49710 | unknown | complete r | 77 | 78 |
| DO49712 | unknown |            | 61 | 61 |
| DO49714 | unknown | complete r | 34 | 34 |
| DO49715 | unknown | complete r | 74 | 75 |
| DO49716 | unknown | complete r | 54 | 54 |
| DO49718 | unknown | complete r | 64 | 65 |
| DO49720 | unknown |            | 79 | 81 |
| DO49722 | unknown | progressio | 64 | 70 |
| DO52163 | unknown | complete r | 58 | 58 |
| DO52166 | unknown | complete r | 70 | 70 |
| DO52168 | unknown | complete r | 61 | 61 |
| DO52169 | unknown | complete r | 75 | 76 |
| DO52170 | unknown | complete r | 62 | 62 |
| DO52171 | unknown | complete r | 50 | 50 |
| DO52172 | unknown | progressio | 26 | 26 |
| DO52173 | unknown | complete r | 63 | 63 |
| DO52174 | unknown | complete r | 48 | 48 |
| DO52175 | unknown | complete r | 57 | 57 |
| DO52177 | unknown | complete r | 59 | 59 |
| DO52179 | unknown | complete r | 47 | 47 |
| DO52181 | unknown | complete r | 58 | 58 |
| DO52182 | unknown | complete r | 54 | 54 |
| DO52183 | unknown | complete r | 56 | 56 |
| DO52184 | unknown | complete r | 59 | 59 |
| DO52185 | unknown | complete r | 61 | 61 |
| DO52186 | unknown | complete r | 18 | 18 |
| DO52187 | unknown | complete r | 74 | 74 |
| DO52188 | unknown | complete r | 39 | 39 |
| DO52189 | unknown | complete r | 51 | 51 |
| DO52190 | unknown | complete r | 52 | 52 |
| DO52194 | unknown | complete r | 51 | 51 |
| DO52196 | unknown | progressio | 65 | 70 |
| DO52197 | unknown | complete r | 74 | 78 |
| DO52200 | unknown | progressio | 62 | 67 |
| DO52205 | unknown | progressio | 69 | 73 |
| DO52206 | unknown | progressio | 75 | 80 |
| DO52207 | unknown | complete r | 70 | 70 |
| DO52208 | unknown |            | 66 | 66 |
| DO52209 | unknown | progressio | 48 | 52 |
| DO52210 | unknown |            | 64 | 65 |
| DO52211 | unknown | progressio | 50 | 51 |
| DO52212 | unknown | complete r | 39 | 43 |
| DO52213 | unknown | complete r | 59 | 62 |
| DO52214 | unknown | complete r | 43 | 46 |
| DO52215 | unknown | progressio | 66 | 66 |
| DO52217 | unknown | progressio | 73 | 73 |
| DO52218 | unknown | progressio | 51 | 52 |
| DO52219 | unknown | complete r | 66 | 67 |
| DO52220 | unknown | complete r | 43 | 45 |
| DO52222 | unknown | progressio | 54 | 56 |
| DO52224 | unknown | complete r | 66 | 67 |
| DO52226 | unknown | complete r | 73 | 75 |
| DO52227 | unknown | complete r | 66 | 68 |
| DO52229 | unknown | complete r | 51 | 53 |
| DO52231 | unknown | complete r | 51 | 53 |
| DO52233 | unknown | complete r | 43 | 45 |
| DO52234 | unknown | complete r | 70 | 72 |
| DO52235 | unknown | complete r | 68 | 70 |

|         |         |            |    |    |
|---------|---------|------------|----|----|
| DO52237 | unknown | complete r | 58 | 59 |
| DO52239 | unknown | complete r | 59 | 60 |
| DO52241 | unknown | complete r | 55 | 55 |
| DO52243 | unknown | complete r | 45 | 45 |
| DO52244 | unknown | complete r | 59 | 59 |
| DO52245 | unknown | complete r | 58 | 62 |
| DO52247 | unknown | complete r | 63 | 63 |
| DO52248 | unknown | complete r | 60 | 60 |
| DO52249 | unknown | complete r | 48 | 48 |
| DO52251 | unknown | complete r | 55 | 55 |
| DO52253 | unknown | complete r | 45 | 45 |
| DO52254 | unknown | complete r | 52 | 52 |
| DO52256 | unknown | complete r | 51 | 51 |
| DO52258 | unknown | complete r | 50 | 50 |
| DO52260 | unknown | complete r | 49 | 49 |
| DO52261 | unknown | progressio | 59 | 59 |
| DO52262 | unknown | complete r | 72 | 73 |
| DO52263 | unknown | complete r | 45 | 45 |
| DO52264 | unknown | complete r | 69 | 70 |
| DO52266 | unknown | complete r | 65 | 66 |
| DO52267 | unknown | complete r | 60 | 61 |
| DO52268 | unknown | complete r | 51 | 52 |
| DO52270 | unknown | progressio | 55 | 56 |
| DO52271 | unknown | complete r | 59 | 60 |
| DO52272 | unknown | complete r | 73 | 74 |
| DO52273 | unknown | complete r | 51 | 53 |
| DO52275 | unknown | complete r | 48 | 54 |
| DO52276 | unknown | complete r | 38 | 44 |
| DO52278 | unknown | complete r | 44 | 50 |
| DO52279 | unknown | complete r | 56 | 60 |
| DO52281 | unknown | complete r | 46 | 51 |
| DO52282 | unknown | complete r | 35 | 40 |
| DO52283 | unknown | progressio | 38 | 42 |
| DO52284 | unknown | complete r | 56 | 60 |
| DO52285 | unknown | complete r | 38 | 42 |
| DO52286 | unknown | complete r | 54 | 58 |
| DO52288 | unknown | progressio | 69 | 73 |
| DO52289 | unknown | complete r | 69 | 72 |
| DO52290 | unknown | complete r | 76 | 76 |
| DO52291 | unknown | progressio | 60 | 61 |
| DO52292 | unknown | complete r | 31 | 31 |
| DO52293 | unknown | complete r | 48 | 48 |
| DO52294 | unknown | complete r | 58 | 58 |
| DO52296 | unknown | complete r | 50 | 50 |
| DO52297 | unknown | complete r | 58 | 58 |
| DO52300 | unknown | complete r | 38 | 38 |
| DO52303 | unknown | progressio | 64 | 64 |
| DO52304 | unknown | complete r | 66 | 66 |
| DO52305 | unknown | complete r | 57 | 59 |
| DO52308 | unknown | complete r | 48 | 48 |
| DO52309 | unknown | complete r | 47 | 48 |
| DO52311 | unknown | progressio | 66 | 67 |
| DO52312 | unknown | progressio | 42 | 43 |
| DO52314 | unknown | complete r | 59 | 60 |
| DO52316 | unknown | complete r | 69 | 71 |
| DO52317 | unknown | progressio | 62 | 63 |
| DO52318 | unknown | progressio | 24 | 25 |
| DO52319 | unknown |            | 59 | 60 |

|         |         |            |    |    |    |
|---------|---------|------------|----|----|----|
| DO52321 | unknown | complete r | 51 |    | 52 |
| DO52323 | unknown | progressio | 60 |    | 60 |
| DO52324 | unknown | complete r | 69 |    | 69 |
| DO52325 | unknown |            | 68 |    | 68 |
| DO52326 | unknown | complete r | 71 |    | 71 |
| DO52327 | unknown | complete r | 62 |    | 62 |
| DO52328 | unknown | complete r | 59 |    | 59 |
| DO52329 | unknown | complete r | 66 |    | 68 |
| DO52330 | unknown | complete r | 72 |    | 73 |
| DO52331 | unknown | complete r | 67 |    | 68 |
| DO52332 | unknown | complete r | 56 |    | 56 |
| DO52333 | unknown | progressio | 51 |    | 53 |
| DO52336 | unknown |            | 55 |    | 55 |
| DO52393 | unknown | complete r | 53 | 53 | 59 |
| DO52394 | unknown | complete r | 49 | 49 | 53 |
| DO52395 | unknown |            | 56 | 56 |    |
| DO52396 | unknown |            | 68 | 68 |    |

| donor_dia | donor_inte | donor_rela | donor_rela  | donor_sex | donor_sun | donor_turr | donor_turr | donor_turr |
|-----------|------------|------------|-------------|-----------|-----------|------------|------------|------------|
| C22.0     |            |            |             | female    |           | 9          |            |            |
| C22.0     |            |            |             | male      |           | 11         |            |            |
| C22.0     |            |            |             | male      |           | 12         |            |            |
| C22.0     |            |            |             | male      |           | 14         |            |            |
| C22.0     |            |            |             | male      |           | 16         |            |            |
| C22.0     |            |            |             | male      |           | 19         |            |            |
| C22.0     |            |            |             | female    |           | 27         |            |            |
| C22.0     |            |            |             | female    |           | 31         |            |            |
| C22.0     |            |            |             | female    |           | 34         |            |            |
| C22.0     |            |            |             | male      |           | 36         |            |            |
| C22.0     |            |            |             | female    |           | 46         |            |            |
| C22.0     |            |            |             | male      |           | 52         |            |            |
| C22.0     |            |            |             | male      |           | 56         |            |            |
| C22.0     |            |            |             | male      |           | 65         |            |            |
| C22.0     |            |            |             | female    |           | 65         |            |            |
| C22.0     |            |            |             | male      |           | 67         |            |            |
| C22.0     |            |            |             | male      |           | 91         |            |            |
| C22.0     |            |            |             | male      |           | 91         |            |            |
| C22.0     |            |            |             | female    |           | 115        |            |            |
| C22.0     |            |            |             | male      |           | 129        |            |            |
| C22.0     |            |            |             | male      |           | 153        |            |            |
| C22.0     |            |            |             | male      |           | 171        |            |            |
| C22.0     |            |            |             | female    |           | 171        |            |            |
| C22.0     |            |            |             | male      |           | 194        |            |            |
| C22.0     |            |            |             | male      |           | 195        |            |            |
| C22.0     |            |            |             | male      |           | 214        |            |            |
| C22.0     |            |            |             | male      |           | 223        |            |            |
| C22.0     |            |            |             | male      |           | 233        |            |            |
| C22.0     |            |            |             | female    |           | 283        |            |            |
| C22.0     |            |            |             | female    |           | 308        |            |            |
| C22.0     |            |            |             | male      |           | 359        |            |            |
| C22.0     |            |            |             | male      |           | 365        |            |            |
| C22.0     |            |            |             | male      |           | 373        |            |            |
| C22.0     |            |            |             | male      |           | 381        |            |            |
| C22.0     |            |            |             | female    |           | 394        |            |            |
| C22.0     |            |            |             | female    |           | 410        |            |            |
| C22.0     |            |            |             | male      |           | 412        |            |            |
| C22.0     |            |            |             | male      |           | 415        |            |            |
| C22.0     |            |            |             | male      |           | 419        |            |            |
| C22.0     |            |            |             | male      |           | 425        |            |            |
| C22.0     |            |            |             | male      |           | 438        |            |            |
| C22.0     |            |            |             | female    |           | 452        |            |            |
| C22.0     |            |            |             | male      |           | 469        |            |            |
| C22.0     |            |            |             | male      |           | 535        |            |            |
| C22.0     |            |            |             | female    |           | 555        |            |            |
| C22.0     |            |            |             | female    |           | 556        |            |            |
| C22.0     | 1729       | 456        | local recur | female    |           | 1729       |            |            |
| C22.0     | 1826       | 748        | local recur | female    |           | 1826       |            |            |
| C22.0     | 412        | 412        |             | female    |           | 412        |            |            |
| C22.0     | 1239       | 503        | local recur | female    |           | 1239       |            |            |
| C22.0     |            |            |             | female    |           | 558        |            |            |
| C22.0     |            |            |             | male      |           | 581        |            |            |
| C22.0     |            |            |             | female    |           | 601        |            |            |
| C22.0     |            |            |             | male      |           | 612        |            |            |
| C22.0     |            |            |             | female    |           | 633        |            |            |
| C22.0     |            |            |             | female    |           | 639        |            |            |



[illegible]

|       |      |      |        |      |        |                  |
|-------|------|------|--------|------|--------|------------------|
|       |      |      | male   |      |        |                  |
|       |      |      | male   |      |        |                  |
|       |      |      | male   |      |        |                  |
|       |      |      | male   |      |        |                  |
|       |      |      | male   |      |        |                  |
|       |      |      | male   |      |        |                  |
|       |      |      | male   |      |        |                  |
|       |      |      | female |      |        |                  |
|       |      |      | male   |      |        |                  |
|       |      |      | male   |      |        |                  |
|       |      |      | male   |      |        |                  |
|       |      |      | male   |      |        |                  |
|       |      |      | female |      |        |                  |
|       |      |      | male   |      |        |                  |
|       |      |      | male   |      |        |                  |
|       |      |      | male   |      |        |                  |
|       |      |      | male   |      |        |                  |
| C22.0 | 1353 | 1353 | male   | 1353 | T1N0M0 | BCLC:A TNM 7th e |
|       |      |      | male   |      |        |                  |
|       |      |      | male   |      |        |                  |
|       |      |      | male   |      |        |                  |
|       |      |      | male   |      |        |                  |
|       |      |      | female |      |        |                  |
| C22.0 |      |      | male   | 785  |        |                  |
|       |      |      | male   |      |        |                  |
| C22.0 |      |      | male   |      |        |                  |
|       |      |      | female | 827  |        |                  |
|       |      |      | male   |      |        |                  |
| C22.0 |      |      | male   | 837  |        |                  |
|       |      |      | male   |      |        |                  |
|       |      |      | male   |      |        |                  |
| C22.0 |      |      | male   | 837  |        |                  |
|       |      |      | male   |      |        |                  |
|       |      |      | male   |      |        |                  |
| C22.0 |      |      | female | 848  |        |                  |
|       |      |      | male   |      |        |                  |
|       |      |      | male   |      |        |                  |
| C22.0 |      |      | female | 899  |        |                  |
|       |      |      | male   |      |        |                  |
|       |      |      | male   |      |        |                  |
|       |      |      | male   |      |        |                  |
|       |      |      | male   |      |        |                  |
|       |      |      | male   |      |        |                  |
| C22.0 |      |      | female | 931  |        |                  |
|       |      |      | female |      |        |                  |
|       |      |      | male   |      |        |                  |
|       |      |      | female |      |        |                  |
|       |      |      | male   |      |        |                  |
|       |      |      | male   |      |        |                  |
|       |      |      | female |      |        |                  |
| C22.0 |      |      | female | 1135 |        |                  |
|       |      |      | male   |      |        |                  |

|       |        |      |
|-------|--------|------|
|       | male   |      |
| C22.0 | female | 1147 |
|       | male   |      |
|       | male   |      |
| C22.0 | female |      |
|       | male   | 1149 |
|       | male   |      |
|       | male   |      |
|       | male   |      |
| C22.0 | male   |      |
|       | female | 1210 |
|       | male   |      |
| C22.0 | male   |      |
|       | male   | 1229 |
|       | male   |      |
| C22.0 | male   |      |
|       | male   | 1271 |
|       | male   |      |
| C22.0 | male   |      |
|       | male   | 1372 |
|       | male   |      |
|       | male   |      |
|       | female |      |
|       | male   |      |
|       | male   |      |
|       | female |      |
| C22.0 | male   |      |
|       | male   | 1386 |
|       | male   |      |
| C22.0 | male   |      |
|       | male   | 1423 |
|       | male   |      |
|       | male   |      |

|       |      |        |      |
|-------|------|--------|------|
| C22.0 |      | male   |      |
|       |      | female | 1490 |
|       |      | male   |      |
|       |      | male   |      |
|       |      | male   |      |
| C22.0 |      | male   |      |
|       |      | female | 1560 |
|       |      | male   |      |
|       |      | female |      |
|       |      | male   |      |
|       |      | male   |      |
| C22.0 | 1569 | male   |      |
|       |      | female | 1569 |
|       |      | male   |      |
| C22.0 |      | male   |      |
|       |      | male   | 1622 |
|       |      | male   |      |
|       |      | male   |      |
|       |      | female |      |
|       |      | male   |      |
|       |      | female |      |
|       |      | male   |      |
|       |      | male   |      |
|       |      | male   |      |
| C22.0 |      | male   |      |
|       |      | male   | 1624 |
|       |      | male   |      |
|       |      | female |      |
|       |      | male   |      |
|       |      | male   |      |
|       |      | male   |      |
|       |      | female |      |
| C22.0 |      | male   |      |
|       |      | male   | 1685 |
|       |      | male   |      |
|       |      | female |      |
|       |      | male   |      |
|       |      | male   |      |
|       |      | female |      |
|       |      | male   |      |
| C22.0 |      | female |      |
|       |      | female |      |

|       |        |        |     |     |
|-------|--------|--------|-----|-----|
|       | male   |        |     |     |
|       | male   |        |     |     |
| C22.0 | male   |        |     |     |
|       | male   |        |     |     |
|       | male   |        |     |     |
| C22.0 | male   |        |     |     |
| C22.0 | male   |        |     |     |
|       | male   |        | I   | TNM |
| C22.0 | male   |        |     |     |
| C22.0 | female |        |     |     |
|       | male   |        | II  | TNM |
| C22.0 | female | 1694   |     |     |
|       | male   |        | II  | TNM |
| C22.0 | male   |        |     |     |
|       | male   |        | I   | TNM |
|       | male   |        | I   | TNM |
| C22.0 | male   |        |     |     |
|       | female |        | I   | TNM |
| C22.0 | male   |        |     |     |
| C22.0 | male   |        |     |     |
|       | male   |        | I   | TNM |
|       | male   |        | II  | TNM |
|       | female |        | III | TNM |
|       | male   |        | I   | TNM |
|       | male   |        | II  | TNM |
|       | male   |        | III | TNM |
|       | male   |        | I   | TNM |
|       | male   |        | I   | TNM |
|       | male   |        | I   | TNM |
|       | male   |        | I   | TNM |
|       | male   |        | III | TNM |
|       | male   |        | I   | TNM |
|       | male   |        | III | TNM |
|       | male   |        | I   | TNM |
|       | male   |        | I   | TNM |
|       | male   |        | I   | TNM |
|       | male   |        | I   | TNM |
|       | male   |        | I   | TNM |
|       | male   |        | II  | TNM |
|       | male   |        | I   | TNM |
|       | male   |        | II  | TNM |
|       | male   |        | I   | TNM |
| C22.0 | male   | 1791   |     |     |
|       | female |        | I   | TNM |
|       | male   |        | I   | TNM |
|       | male   |        | I   | TNM |
|       | male   |        | III | TNM |
|       | male   |        | I   | TNM |
|       | female |        | I   | TNM |
|       | male   |        | I   | TNM |
|       | male   |        | I   | TNM |
|       | male   |        | III | TNM |
|       | male   |        | IV  | TNM |
|       | male   | T1N0M0 | I   | TNM |
|       | male   | T2N0M0 | II  | TNM |
|       | male   | T1N0M0 | I   | TNM |
|       | male   | T1N0M0 | I   | TNM |
|       | male   | T1N0M0 | I   | TNM |
|       | male   | T1N0M0 | I   | TNM |

|       |        |         |      |     |
|-------|--------|---------|------|-----|
|       | male   | T1N0M0  | I    | TNM |
|       | male   | T2N0M0  | II   | TNM |
|       | female | T2N0M0  | II   | TNM |
|       | female | T1N0M0  | I    | TNM |
|       | female | T1N0M0  | I    | TNM |
| C22.0 | female | 2116    |      |     |
|       | female | T2N0M0  | II   | TNM |
|       | male   | T2N0M0  | II   | TNM |
|       | male   | T1N0M0  | I    | TNM |
|       | male   | T1N0M0  | I    | TNM |
|       | female | T1N0M0  | I    | TNM |
|       | male   | T2N0M0  | II   | TNM |
|       | male   | T1N0M0  | I    | TNM |
|       | male   | T3aN0M0 | IIIA | TNM |
|       | male   | T1N0M0  | I    | TNM |
|       | male   | T1N0M0  | I    | TNM |
|       | male   | T3aN0M0 | IIIA | TNM |
|       | male   | T1N0M0  | I    | TNM |
|       | male   | T1N0M0  | I    | TNM |
|       | male   | T2N0M0  | II   | TNM |
|       | male   | T1N0M0  | I    | TNM |
|       | male   | T2N0M0  | II   | TNM |
| C22.0 | female | 2131    |      |     |
|       | male   | T1N0M0  | I    | TNM |
|       | male   | T1N0M0  | I    | TNM |
|       | male   | T1N0M0  | I    | TNM |
|       | male   | T2N0M0  | II   | TNM |
|       | male   | T2N0M0  | II   | TNM |
|       | male   | T1N0M0  | I    | TNM |
|       | male   | T1N0M0  | I    | TNM |
|       | male   | T3bN0M0 | IIb  | TNM |
|       | male   | T1N0M0  | I    | TNM |
|       | female | T1N0M0  | I    | TNM |
|       | male   | T1N0M0  | I    | TNM |
| C22.0 | female | 2456    |      |     |
|       | male   | T1N0M0  | I    | TNM |
|       | female | T1N0M0  | I    | TNM |
|       | male   | T2N0M0  | II   | TNM |
|       | male   | T2N0M0  | II   | TNM |
|       | male   | T1N0M0  | I    | TNM |
|       | male   | T2N0M0  | II   | TNM |
|       | female | T2N0M0  | II   | TNM |
|       | male   | T1N0M0  | I    | TNM |
|       | male   | T1N0M0  | I    | TNM |
|       | male   | T1N0M0  | I    | TNM |
|       | male   | T1N0M0  | I    | TNM |
|       | male   | T1N0M0  | I    | TNM |
|       | male   | T1N0M0  | I    | TNM |
|       | male   | T1N0M0  | I    | TNM |
|       | male   | T3bN0M1 | IIb  | TNM |
|       | male   | T1N0M0  | I    | TNM |
|       | male   | T1N0M0  | I    | TNM |
|       | male   | T2N0M0  | II   | TNM |
|       | male   | T1N0M0  | I    | TNM |
|       | male   | T1N0M0  | I    | TNM |
|       | male   | T1N0M0  | I    | TNM |
|       | male   | T1N0M0  | I    | TNM |
|       | male   | T1N0M0  | I    | TNM |

|       |      |        |        |     |     |
|-------|------|--------|--------|-----|-----|
|       |      | male   | T2N0M0 | II  | TNM |
|       |      | male   | T1N0M0 | I   | TNM |
|       |      | male   | T1N0M0 | I   | TNM |
|       |      | female | T1N0M0 | I   | TNM |
| C22.0 |      | female | 2532   |     |     |
|       |      | female | T2N0M0 | II  | TNM |
|       |      | male   | T3N0M0 | III | TNM |
|       |      | female | T1N0M0 | I   | TNM |
|       |      | male   | T3N0M0 | III | TNM |
|       |      | male   | T2N0M0 | II  | TNM |
|       |      | male   | T1N0M0 | I   | TNM |
|       |      | male   | T2N0M0 | II  | TNM |
|       |      | female | T4N0M1 | IVb | TNM |
|       |      | male   | T1N0M0 | I   | TNM |
|       |      | female | T1N0M0 | I   | TNM |
|       |      | male   | T1N0M0 | I   | TNM |
|       |      | male   | T2N0M0 | II  | TNM |
|       |      | female | T1N0M0 | I   | TNM |
| C22.0 |      | male   | 2542   |     |     |
| C22.0 |      | male   | 2759   |     |     |
| C22.0 |      | female | 3125   |     |     |
| C22.0 |      | female | 3258   |     |     |
| C22.0 | 2442 | male   | 2442   |     |     |
| C22.0 | 3675 | male   | 1210   |     |     |
| C22.0 | 1582 | female | 1339   |     |     |
| C22.0 | 1257 | male   | 0      |     |     |
| C22.0 | 1270 | male   | 2415   |     |     |
| C22.0 | 357  | female | 12     |     |     |
| C22.0 | 1133 | female | 334    |     |     |
| C22.0 | 456  | male   | 265    |     |     |
| C22.0 | 158  | male   | 0      |     |     |
| C22.0 | 243  | male   | 9      |     |     |
| C22.0 | 63   | male   | 527    |     |     |
| C22.0 | 61   | female | 470    |     |     |
| C22.0 | 289  | male   | 120    |     |     |
| C22.0 | 0    | male   |        |     |     |
| C22.0 | 0    | male   |        |     |     |
| C22.0 | 0    | male   |        |     |     |
| C22.0 | 0    | male   |        |     |     |
| C22.0 | 1292 | male   |        |     |     |
| C22.0 | 1485 | male   |        |     |     |
| C22.0 | 1291 | female |        |     |     |
| C22.0 | 1210 | male   |        |     |     |
| C22.0 | 1140 | male   |        |     |     |
| C22.0 | 918  | male   |        |     |     |
| C22.0 | 808  | male   |        |     |     |
| C22.0 | 230  | male   |        |     |     |
| C22.0 | 1233 | male   |        |     |     |
| C22.0 | 1644 | male   |        |     |     |
| C22.0 | 266  | male   |        |     |     |
| C22.0 | 113  | male   |        |     |     |
| C22.0 | 19   | male   |        |     |     |
| C22.0 | 588  | male   |        |     |     |
| C22.0 | 23   | male   |        |     |     |
| C22.0 | 553  | male   |        |     |     |
| C22.0 | 0    | male   |        |     |     |
| C22.0 | 2455 | male   |        |     |     |

|       |      |                         |         |   |  |            |
|-------|------|-------------------------|---------|---|--|------------|
| C22.0 | 697  | male                    |         |   |  |            |
| C22.0 | 0    | male                    |         |   |  |            |
| C22.0 | 22   | female                  |         |   |  |            |
| C22.0 | 15   | female                  |         |   |  |            |
| C22.0 | 9    | male                    |         |   |  |            |
| C22.0 | 473  | female                  |         |   |  |            |
|       |      | female                  |         |   |  | tumor stag |
|       |      | female                  |         |   |  | tumor stag |
|       |      | female                  |         |   |  | tumor stag |
|       |      | male                    |         |   |  | tumor stag |
|       |      | female                  |         |   |  | tumor stag |
|       |      | female                  |         |   |  | tumor stag |
|       |      | male                    |         |   |  | tumor stag |
|       |      | female                  |         |   |  | tumor stag |
|       |      | female                  |         |   |  | tumor stag |
|       |      | female                  |         |   |  | tumor stag |
|       | 1940 | 288 local recur male    | 1940 4A |   |  | tumor stag |
|       | 120  | 0 distant rec male      | 120 4B  |   |  | tumor stag |
|       | 711  | 94 local recur male     | 711     | 2 |  | tumor stag |
|       | 1817 | female                  | 1817    | 2 |  | tumor stag |
|       | 1746 | 313 local recur male    | 1746 4A |   |  | tumor stag |
|       | 1833 | 806 local recur male    | 1833 4A |   |  | tumor stag |
|       | 578  | 118 local recur male    | 578     | 3 |  | tumor stag |
|       | 1718 | 282 local recur male    | 1718    | 3 |  | tumor stag |
|       | 1792 | male                    | 1792    | 3 |  | tumor stag |
|       | 1494 | female                  | 1494    | 2 |  | tumor stag |
|       | 339  | 87 local recur male     | 339 4A  |   |  | tumor stag |
|       | 557  | male                    | 557     | 2 |  | tumor stag |
|       | 1586 | male                    | 1586    | 2 |  | tumor stag |
|       | 616  | 575 local recur male    | 616     | 2 |  | tumor stag |
|       | 92   | 6 local recur male      | 92 4A   |   |  | tumor stag |
|       | 1553 | female                  | 1553    | 2 |  | tumor stag |
|       | 1605 | 1130 local recur female | 1605    | 1 |  | tumor stag |
|       | 253  | female                  | 253     | 2 |  | tumor stag |
|       | 1461 | male                    | 1461    | 3 |  | tumor stag |
|       | 775  | 440 local recur female  | 775     | 1 |  | tumor stag |
|       | 1404 | 707 local recur male    | 1404    | 2 |  | tumor stag |
|       | 740  | 200 local recur male    | 740     | 3 |  | tumor stag |
|       | 1357 | 188 local recur male    | 1357    | 3 |  | tumor stag |
|       | 480  | 53 distant rec male     | 480 4A  |   |  | tumor stag |
|       | 1339 | male                    | 1339    | 2 |  | tumor stag |
| C22.0 | 487  | male                    | 487 G1  |   |  | neoplasm_  |
| C22.0 | 1121 | male                    | 1121 G2 |   |  | neoplasm_  |
| C22.0 | 771  | male                    | 771 G1  |   |  | neoplasm_  |
|       | 904  | 260 distant rec male    | 904     | 3 |  | tumor stag |
| C22.0 | 1086 | female                  | 1086 G2 |   |  | neoplasm_  |
| C22.0 | 1103 | male                    | 1103 G1 |   |  | neoplasm_  |
| C22.0 | 1049 | female                  | 1049 G2 |   |  | neoplasm_  |
| C22.0 | 977  | male                    | 977 G2  |   |  | neoplasm_  |
| C22.0 | 926  | male                    | 926 G1  |   |  | neoplasm_  |
| C22.0 | 309  | male                    | 309 G1  |   |  | neoplasm_  |
|       | 603  | 265 local recur male    | 603     | 3 |  | tumor stag |
| C22.0 | 361  | male                    | 361 G2  |   |  | neoplasm_  |
| C22.0 | 357  | male                    | 357 G2  |   |  | neoplasm_  |
| C22.0 | 351  | male                    | 351 G2  |   |  | neoplasm_  |
| C22.0 | 248  | male                    | 248 G1  |   |  | neoplasm_  |
| C22.0 | 400  | male                    | 400 G1  |   |  | neoplasm_  |
| C22.0 | 419  | male                    | 419 G2  |   |  | neoplasm_  |



|       |      |                  |        |         |   |            |
|-------|------|------------------|--------|---------|---|------------|
|       | 770  | 31 local recur   | male   | 770 4A  |   | tumor stag |
| C22.0 | 386  |                  | male   | 386 G1  |   | neoplasm_  |
| C22.0 | 351  |                  | male   | 351 G1  |   | neoplasm_  |
| C22.0 | 375  |                  | male   | 375 G2  |   | neoplasm_  |
| C22.0 | 842  |                  | male   | 842 G2  |   | neoplasm_  |
| C22.0 | 873  |                  | female | 873 G1  |   | neoplasm_  |
|       | 893  | 175 local recur  | male   | 893     | 3 | tumor stag |
| C22.0 | 858  |                  | male   | 858 G1  |   | neoplasm_  |
| C22.0 | 599  |                  | male   | 599 G2  |   | neoplasm_  |
| C22.0 | 647  |                  | male   | 647 G1  |   | neoplasm_  |
| C22.0 | 734  |                  | female | 734 G1  |   | neoplasm_  |
| C22.0 | 718  |                  | male   | 718 G2  |   | neoplasm_  |
| C22.0 | 727  |                  | male   | 727 G1  |   | neoplasm_  |
| C22.0 | 469  |                  | male   | 469 G1  |   | neoplasm_  |
|       | 1258 | 1132 local recur | male   | 1258    | 3 | tumor stag |
| C22.0 | 550  |                  | male   | 550 G1  |   | neoplasm_  |
| C22.0 | 538  |                  | female | 538 G2  |   | neoplasm_  |
| C22.0 | 524  |                  | male   | 524 G2  |   | neoplasm_  |
| C22.0 | 460  |                  | female | 460 G1  |   | neoplasm_  |
| C22.0 | 114  |                  | female | 114 G2  |   | neoplasm_  |
| C22.0 | 417  |                  | female | 417 G2  |   | neoplasm_  |
|       | 1315 |                  | male   | 1315    | 3 | tumor stag |
| C22.0 | 1338 |                  | male   | 1338 G1 |   | neoplasm_  |
| C22.0 | 1305 |                  | male   | 1305 G2 |   | neoplasm_  |
| C22.0 | 1336 |                  | male   | 1336 G1 |   | neoplasm_  |
| C22.0 | 1312 |                  | male   | 1312 G1 |   | neoplasm_  |
| C22.0 | 564  |                  | female | 564 G3  |   | neoplasm_  |
| C22.0 | 1280 |                  | male   | 1280 G2 |   | neoplasm_  |
| C22.0 | 1299 |                  | male   | 1299 G1 |   | neoplasm_  |
|       | 1166 | 201 local recur  | male   | 1166    | 3 | tumor stag |
| C22.0 | 1233 |                  | male   | 1233 G2 |   | neoplasm_  |
| C22.0 | 99   |                  | male   | 99 G2   |   | neoplasm_  |
| C22.0 | 144  |                  | male   | 144 G2  |   | neoplasm_  |
| C22.0 | 1203 |                  | male   | 1203 G3 |   | neoplasm_  |
| C22.0 | 1080 |                  | male   | 1080 G1 |   | neoplasm_  |
| C22.0 | 1219 |                  | male   | 1219 G1 |   | neoplasm_  |
| C22.0 | 1217 |                  | male   | 1217 G1 |   | neoplasm_  |
|       | 620  | 291 local recur  | female | 620 4A  |   | tumor stag |
| C22.0 | 1174 |                  | male   | 1174 G2 |   | neoplasm_  |
| C22.0 | 1168 |                  | male   | 1168 G1 |   | neoplasm_  |
| C22.0 | 202  |                  | female | 202 G2  |   | neoplasm_  |
| C22.0 | 433  |                  | male   | 433 G2  |   | neoplasm_  |
| C22.0 | 430  |                  | male   | 430 G1  |   | neoplasm_  |
| C22.0 |      |                  | male   | G2      |   | neoplasm_  |
|       | 1187 | 990 local recur  | male   | 1187    | 2 | tumor stag |
| C22.0 |      |                  | male   | G2      |   | neoplasm_  |
| C22.0 |      |                  | female | G2      |   | neoplasm_  |
| C22.0 |      |                  | female | G1      |   | neoplasm_  |
| C22.0 |      |                  | male   | G2      |   | neoplasm_  |
| C22.0 |      |                  | male   | G2      |   | neoplasm_  |
| C22.0 |      |                  | male   | ND      |   | neoplasm_  |
| C22.0 |      |                  | male   | G1      |   | neoplasm_  |
|       | 1248 | 79 local recur   | male   | 1248 4A |   | tumor stag |
| C22.0 |      |                  | male   | ND      |   | neoplasm_  |
| C22.0 |      |                  | male   | G2      |   | neoplasm_  |
| C22.0 |      |                  | female | G2      |   | neoplasm_  |
| C22.0 |      |                  | male   | G2      |   | neoplasm_  |
| C22.0 |      |                  | male   | G2      |   | neoplasm_  |

|       |      |                 |              |   |            |
|-------|------|-----------------|--------------|---|------------|
| C22.0 |      | male            | G2           |   | neoplasm_  |
| C22.0 |      | female          | G2           |   | neoplasm_  |
| C22.0 |      | male            | G2           |   | neoplasm_  |
| C22.0 |      | male            | G2           |   | neoplasm_  |
| C22.0 |      | male            | G2           |   | neoplasm_  |
| C22.0 |      | male            | G2           |   | neoplasm_  |
|       | 1198 | 419 local recur | male 1198 4A |   | tumor stag |
| C22.0 |      | male            | G2           |   | neoplasm_  |
| C22.0 |      | male            | G2           |   | neoplasm_  |
| C22.0 |      | male            | G2           |   | neoplasm_  |
| C22.0 |      | male            | G2           |   | neoplasm_  |
| C22.0 |      | female          | G2           |   | neoplasm_  |
| C22.0 |      | male            | G2           |   | neoplasm_  |
| C22.0 |      | male            | G2           |   | neoplasm_  |
| C22.0 |      | female          | G2           |   | neoplasm_  |
| C22.0 |      | female          | G1           |   | neoplasm_  |
| C22.0 |      | female          | G2           |   | neoplasm_  |
|       | 305  | 151 distant rec | male 305     | 3 | tumor stag |
| C22.0 |      | male            | G2           |   | neoplasm_  |
| C22.0 |      | male            | G2           |   | neoplasm_  |
| C22.0 |      | female          | G2           |   | neoplasm_  |
| C22.0 |      | female          | G2           |   | neoplasm_  |
| C22.0 | 326  | female          | 326 G2       |   | neoplasm_  |
| C22.0 | 211  | male            | 211 G3       |   | neoplasm_  |
| C22.0 | 742  | male            | 742 G2       |   | neoplasm_  |
| C22.0 | 57   | male            | 57 G1        |   | neoplasm_  |
| C22.0 | 726  | male            | 726 G2       |   | neoplasm_  |
|       | 1133 | 191 local recur | male 1133    | 3 | tumor stag |
| C22.0 | 694  | female          | 694 G2       |   | neoplasm_  |
| C22.0 | 662  | male            | 662 G1       |   | neoplasm_  |
| C22.0 | 687  | male            | 687 G2       |   | neoplasm_  |
| C22.0 | 673  | male            | 673 G2       |   | neoplasm_  |
| C22.0 | 26   | male            | 26 G2        |   | neoplasm_  |
| C22.0 | 261  | male            | 261 G1       |   | neoplasm_  |
| C22.0 | 151  | male            | 151 G2       |   | neoplasm_  |
| C22.0 | 578  | male            | 578 G3       |   | neoplasm_  |
| C22.0 | 640  | male            | 640 G2       |   | neoplasm_  |
| C22.0 | 39   | female          | 39 G1        |   | neoplasm_  |
|       | 1126 | male            | 1126         | 2 | tumor stag |
| C22.0 | 148  | male            | 148 G3       |   | neoplasm_  |
| C22.0 | 611  | male            | 611 G3       |   | neoplasm_  |
| C22.0 | 432  | male            | 432 G2       |   | neoplasm_  |
| C22.0 | 544  | male            | 544 G2       |   | neoplasm_  |
| C22.0 | 564  | male            | 564 G2       |   | neoplasm_  |
| C22.0 | 524  | male            | 524 G2       |   | neoplasm_  |
| C22.0 | 283  | female          | 283 G2       |   | neoplasm_  |
| C22.0 | 493  | male            | 493 G2       |   | neoplasm_  |
| C22.0 |      | male            |              |   |            |
| C22.0 | 544  | male            | 544 G2       |   | neoplasm_  |
| C22.0 | 544  | male            | 544 G1       |   | neoplasm_  |
|       | 1111 | 477 local recur | male 1111    | 2 | tumor stag |
| C22.0 | 9    | female          | 9 G2         |   | neoplasm_  |
| C22.0 | 172  | male            | 172 G3       |   | neoplasm_  |
| C22.0 | 92   | male            | 92 G2        |   | neoplasm_  |
| C22.0 |      | male            |              |   |            |
| C22.0 | 458  | female          | 458 G1       |   | neoplasm_  |
| C22.0 | 20   | male            | 20 G2        |   | neoplasm_  |
| C22.0 | 472  | male            | 472 G3       |   | neoplasm_  |

|       |      |                        |        |      |            |
|-------|------|------------------------|--------|------|------------|
| C22.0 | 138  | female                 | 138 G1 |      | neoplasm_  |
| C22.0 | 176  | male                   | 176 G2 |      | neoplasm_  |
|       | 9    | male                   | 9      | 3    | tumor stag |
| C22.0 | 447  | male                   | 447 G2 |      | neoplasm_  |
| C22.0 | 414  | male                   | 414 G2 |      | neoplasm_  |
| C22.0 | 423  | male                   | 423 G2 |      | neoplasm_  |
| C22.0 | 377  | male                   | 377 G2 |      | neoplasm_  |
| C22.0 | 122  | male                   | 122 G2 |      | neoplasm_  |
| C22.0 | 380  | male                   | 380 G2 |      | neoplasm_  |
| C22.0 | 394  | male                   | 394 G2 |      | neoplasm_  |
| C22.0 | 377  | male                   | 377 G1 |      | neoplasm_  |
|       | 1055 | female                 | 1055   | 3    | tumor stag |
| C22.0 | 57   | female                 | 57 G2  |      | neoplasm_  |
| C22.0 | 292  | male                   | 292 G2 |      | neoplasm_  |
| C22.0 | 335  | male                   | 335 G2 |      | neoplasm_  |
| C22.0 | 331  | male                   | 331 G3 |      | neoplasm_  |
| C22.0 | 80   | male                   | 80 G1  |      | neoplasm_  |
| C22.0 | 355  | male                   | 355 G3 |      | neoplasm_  |
|       | 771  | 523 distant rec male   | 771    | 3    | tumor stag |
| C22.0 | 342  | male                   | 342 G2 |      | neoplasm_  |
| C22.0 | 22   | male                   | 22 G2  |      | neoplasm_  |
| C22.0 | 360  | male                   | 360 G1 |      | neoplasm_  |
| C22.0 | 337  | male                   | 337 ND |      | neoplasm_  |
| C22.0 | 368  | female                 | 368 G1 |      | neoplasm_  |
|       | 1053 | male                   | 1053   | 3    | tumor stag |
| C22.0 | 309  | male                   | 309 G2 |      | neoplasm_  |
| C22.0 | 267  | male                   | 267 ND |      | neoplasm_  |
| C22.0 | 290  | male                   | 290 G2 |      | neoplasm_  |
| C22.0 | 335  | female                 | 335 G1 |      | neoplasm_  |
| C22.0 | 305  | male                   | 305 G1 |      | neoplasm_  |
| C22.0 | 306  | male                   | 306 G1 |      | neoplasm_  |
| C22.0 | 236  | female                 | 236 G2 |      | neoplasm_  |
|       | 548  | 200 local recur female | 548 4A |      | tumor stag |
| C22.0 | 260  | female                 | 260 G2 |      | neoplasm_  |
| C22.0 | 275  | male                   | 275 G2 |      | neoplasm_  |
| C22.0 | 247  | male                   | 247 G2 |      | neoplasm_  |
| C22.0 | 154  | male                   | 154 G2 |      | neoplasm_  |
| C22.0 | 152  | male                   | 152 G2 |      | neoplasm_  |
| C22.0 | 256  | female                 | 256 G2 |      | neoplasm_  |
|       | 1044 | male                   | 1044   | 2    | tumor stag |
| C26.8 |      | female                 | 49     | IIIA | TNM        |
| C26.8 |      | male                   | 2067   | II   | TNM        |
| C26.8 |      | female                 | 364    | IIIA | TNM        |
| C26.8 |      | female                 | 2477   | II   | TNM        |
| C26.8 |      | male                   | 384    | IVA  | TNM        |
| C26.8 |      | female                 | 980    | I    | TNM        |
| C26.8 |      | male                   | 241    | IIIA | TNM        |
|       | 240  | 201 local recur male   | 240    | 2    | tumor stag |
| C26.8 |      | male                   | 658    | IIIA | TNM        |
| C26.8 |      | male                   | 262    | II   | TNM        |
| C26.8 |      | male                   | 1586   | IIIA | TNM        |
| C26.8 |      | male                   | 2662   | IVA  | TNM        |
| C26.8 |      | male                   | 673    | IIIA | TNM        |
| C26.8 |      | female                 | 677    | II   | TNM        |
| C26.8 |      | male                   | 1602   | IIIA | TNM        |
| C26.8 |      | female                 | 189    | IIIA | TNM        |
| C26.8 |      | female                 | 1632   | IVA  | TNM        |
| C26.8 |      | male                   | 2266   | IIIA | TNM        |

|       |      |                 |        |         |      |            |
|-------|------|-----------------|--------|---------|------|------------|
| C26.8 |      |                 | male   | 70      | IVA  | TNM        |
| C26.8 |      |                 | female | 420     | II   | TNM        |
| C26.8 |      |                 | male   | 48      | IVA  | TNM        |
| C26.8 |      |                 | male   | 3362    | IIIA | TNM        |
| C26.8 |      |                 | male   | 0       | IIIA | TNM        |
| C26.8 |      |                 | male   | 350     | II   | TNM        |
| C26.8 |      |                 | female | 327     | IIIA | TNM        |
| C26.8 |      |                 | female | 3312    | IIIA | TNM        |
| C26.8 |      |                 | male   | 166     | IIIA | TNM        |
| C26.8 |      |                 | male   | 611     | II   | TNM        |
|       | 1015 | 332 local recur | male   | 1015    | 3    | tumor staç |
| C26.8 |      |                 | male   | 3612    | II   | TNM        |
| C26.8 |      |                 | male   | 140     | IVA  | TNM        |
| C26.8 |      |                 | male   | 2718    | II   | TNM        |
| C26.8 |      |                 | male   | 1543    | II   | TNM        |
| C26.8 |      |                 | female | 30      | IVA  | TNM        |
| C26.8 |      |                 | male   | 136     | II   | TNM        |
| C26.8 |      |                 | female | 3935    | II   | TNM        |
| C26.8 |      |                 | male   | 4014    | IIIA | TNM        |
| C26.8 |      |                 | male   | 4053    | II   | TNM        |
| C26.8 |      |                 | male   | 3696    | II   | TNM        |
| C26.8 |      |                 | male   | 1602    | IIIA | TNM        |
| C26.8 |      |                 | male   | 411     | II   | TNM        |
| C26.8 |      |                 | male   | 1664    | IIIA | TNM        |
| C26.8 |      |                 | female | 1847    | III  | AJCC       |
| C26.8 |      |                 | male   | 1894    |      |            |
| C26.8 |      |                 | male   | 1956    | II   | TNM        |
| C26.8 |      |                 | male   | 2516    | III  | TNM        |
| C26.8 |      |                 | male   | 2493    | II   | TNM        |
| C26.8 |      |                 | male   | 1516    | II   | TNM        |
| C26.8 |      |                 | female | 1750    | II   | TNM        |
|       | 1029 | 344 local recur | female | 1029 4A |      | tumor staç |
| C26.8 |      |                 | male   | 58      | IVA  | TNM        |
| C26.8 |      |                 | male   | 1546    | II   | TNM        |
| C26.8 |      |                 | male   | 189     | IVA  | TNM        |
| C26.8 |      |                 | male   | 570     | II   | TNM        |
| C26.8 |      |                 | male   | 1692    | II   | TNM        |
| C26.8 |      |                 | male   | 459     | IIIA | TNM        |
| C26.8 |      |                 | male   | 168     | IIIA | TNM        |
| C26.8 |      |                 | female | 243     | I    | TNM        |
| C26.8 |      |                 | male   | 55      | IVA  | TNM        |
| C26.8 |      |                 | male   | 84      | II   | TNM        |
| C26.8 |      |                 | male   | 1922    | II   | TNM        |
| C26.8 |      |                 | male   | 129     | II   | TNM        |
| C26.8 |      |                 | male   | 1793    | IVA  | TNM        |
| C26.8 |      |                 | female | 320     | IIIA | TNM        |
| C26.8 |      |                 | male   | 1207    | IIIA | TNM        |
| C26.8 |      |                 | male   | 1913    | IIIA | TNM        |
|       | 976  |                 | male   | 976     | 3    | tumor staç |
| C26.8 |      |                 | male   | 1562    | IVA  | TNM        |
| C26.8 |      |                 | male   | 45      | II   | TNM        |
| C26.8 |      |                 | male   | 2127    | II   | TNM        |
| C26.8 |      |                 | male   | 132     | IIIA | TNM        |
| C26.8 |      |                 | male   | 479     | IVA  | TNM        |
| C26.8 |      |                 | male   | 81      | IVA  | TNM        |
| C26.8 |      |                 | male   | 1667    | II   | TNM        |
| C26.8 |      |                 | male   | 203     | IIIA | TNM        |
| C26.8 |      |                 | male   | 104     | IVA  | TNM        |

|       |     |                        |        |      |            |
|-------|-----|------------------------|--------|------|------------|
|       | 91  | male                   | 91     | 3    | tumor staç |
| C26.8 |     | male                   | 392    | IVA  | TNM        |
| C26.8 |     | female                 | 1999   | IVA  | TNM        |
| C26.8 |     | male                   | 2332   | II   | TNM        |
| C26.8 |     | male                   | 2353   | IIIA | TNM        |
| C26.8 |     | male                   | 73     | IIIA | TNM        |
| C26.8 |     | male                   | 2456   | II   | TNM        |
| C26.8 |     | male                   | 6      | II   | TNM        |
| C26.8 |     | female                 | 390    | IIIA | TNM        |
| C26.8 |     | male                   | 2330   | II   | TNM        |
| C26.8 |     | male                   | 192    | IIIA | TNM        |
| C26.8 |     | male                   | 1116   | IIIA | TNM        |
| C26.8 |     | female                 | 2428   | II   | TNM        |
| C26.8 |     | male                   | 911    | II   | TNM        |
| C26.8 |     | male                   | 2724   | II   | TNM        |
| C26.8 |     | male                   | 143    | II   | TNM        |
| C26.8 |     | male                   | 2482   | II   | TNM        |
|       | 606 | female                 | 606    | 2    | tumor staç |
|       | 211 | 22 local recur male    | 211    | 3    | tumor staç |
|       | 969 | 847 local recur female | 969    | 1    | tumor staç |
|       | 862 | male                   | 862    | 3    | tumor staç |
|       | 889 | 261 local recur male   | 889    | 2    | tumor staç |
|       | 771 | male                   | 771    | 2    | tumor staç |
|       | 911 | 155 local recur male   | 911 4A |      | tumor staç |
|       | 204 | 189 distant rec male   | 204    | 2    | tumor staç |
|       | 757 | female                 | 757    | 2    | tumor staç |
|       | 293 | male                   | 293    | 3    | tumor staç |
|       | 881 | 89 local recur male    | 881    | 2    | tumor staç |
|       | 254 | male                   | 254    | 3    | tumor staç |
|       | 824 | female                 | 824 4A |      | tumor staç |
|       | 773 | 279 local recur male   | 773 4A |      | tumor staç |
|       | 860 | 277 local recur female | 860    | 3    | tumor staç |
|       | 841 | 127 local recur male   | 841    | 3    | tumor staç |
|       | 685 | 132 local recur male   | 685 4A |      | tumor staç |
|       | 697 | male                   | 697    | 2    | tumor staç |
|       | 677 | male                   | 677    | 3    | tumor staç |
|       | 837 | 809 local recur male   | 837    | 2    | tumor staç |
|       | 833 | 635 local recur female | 833    | 2    | tumor staç |
|       | 829 | 644 local recur male   | 829    | 3    | tumor staç |
|       | 795 | male                   | 795    | 3    | tumor staç |
|       | 423 | 330 local recur male   | 423    | 3    | tumor staç |
|       | 712 | male                   | 712    | 3    | tumor staç |
|       | 278 | 228 local recur male   | 278    |      | tumor staç |
|       | 92  | male                   | 92     | 2    | tumor staç |
|       | 642 | male                   | 642    | 2    | tumor staç |
|       | 278 | 74 local recur male    | 278    | 3    | tumor staç |
|       | 690 | female                 | 690    | 3    | tumor staç |
|       | 605 | 238 local recur female | 605    | 2    | tumor staç |
|       | 608 | female                 | 608    | 1    | tumor staç |
|       | 175 | 79 local recur male    | 175    | 3    | tumor staç |
|       | 600 | 244 local recur male   | 600 4A |      | tumor staç |
|       | 580 | 121 local recur male   | 580 4A |      | tumor staç |
|       | 560 | 209 local recur male   | 560    | 3    | tumor staç |
|       | 487 | 396 local recur female | 487    | 2    | tumor staç |
|       | 547 | 153 local recur male   | 547 4A |      | tumor staç |
|       | 340 | 141 local recur male   | 340    | 3    | tumor staç |
|       | 513 | male                   | 513    | 3    | tumor staç |
|       | 435 | male                   | 435    | 3    | tumor staç |

|      |      |                    |         |   |            |
|------|------|--------------------|---------|---|------------|
| 472  |      | female             | 472     | 2 | tumor staç |
| 99   |      | male               | 99      | 3 | tumor staç |
| 408  |      | male               | 408     | 3 | tumor staç |
| 437  | 251  | local recur male   | 437     | 1 | tumor staç |
|      |      | male               |         |   | tumor stag |
| 4926 | 3576 | local recur male   | 4926    | 2 | tumor staç |
| 3898 | 241  | local recur male   | 3898    | 2 | tumor staç |
| 3677 | 560  | local recur female | 3677    | 3 | tumor staç |
| 3328 | 2667 | local recur male   | 3328    | 2 | tumor staç |
| 406  | 135  | local recur male   | 406 4A  |   | tumor staç |
| 3228 | 434  | local recur female | 3228    | 2 | tumor staç |
| 2441 | 641  | local recur male   | 2441    | 3 | tumor staç |
| 2970 |      | male               | 2970    | 3 | tumor staç |
| 447  | 370  | local recur male   | 447 4A  |   | tumor staç |
| 1951 |      | male               | 1951    | 2 | tumor staç |
| 2067 | 1775 | local recur female | 2067    | 2 | tumor staç |
| 2040 | 209  | local recur male   | 2040 4A |   | tumor staç |
| 1251 | 607  | local recur female | 1251    | 2 | tumor staç |
| 1739 |      | male               | 1739    | 2 | tumor staç |
| 320  |      | female             | 320     | 2 | tumor staç |
| 308  | 131  | local recur male   | 308     | 3 | tumor staç |
| 330  |      | male               | 330     |   | tumor staç |
| 349  |      | male               | 349     | 3 | tumor staç |
| 295  |      | male               | 295     | 3 | tumor staç |
| 343  | 85   | distant rec female | 343 4A  |   | tumor staç |
| 306  | 215  | local recur male   | 306     | 3 | tumor staç |
|      |      | male               |         |   | tumor stag |
| 2769 | 1607 | local recur male   | 2769 4A |   | tumor staç |
| 4901 | 4901 | local recur female | 4901    | 2 | tumor staç |
| 1932 | 214  | local recur male   | 1932    | 3 | tumor staç |
| 481  | 435  | local recur female | 481     | 3 | tumor staç |
| 1490 | 207  | local recur female | 1490 4A |   | tumor staç |
| 5077 | 2173 | distant rec male   | 5077    |   | tumor staç |
| 842  | 281  | local recur male   | 842     | 3 | tumor staç |
| 1214 |      | male               | 1214    | 2 | tumor staç |
| 1495 | 368  | local recur male   | 1495    | 2 | tumor staç |
| 2970 | 1178 | local recur male   | 2970    | 2 | tumor staç |
| 3437 |      | male               | 3437    | 3 | tumor staç |
| 552  | 129  | local recur male   | 552     | 2 | tumor staç |
| 289  | 105  | local recur male   | 289     | 3 | tumor staç |
| 389  | 251  | local recur male   | 389     | 2 | tumor staç |
| 962  | 237  | local recur female | 962 4A  |   | tumor staç |
| 1648 | 1292 | local recur male   | 1648    | 2 | tumor staç |
| 1633 | 36   | local recur female | 1633 4A |   | tumor staç |
| 1114 | 595  | local recur male   | 1114    | 2 | tumor staç |
| 1096 | 535  | local recur male   | 1096    | 2 | tumor staç |
| 930  | 208  | local recur male   | 930 4A  |   | tumor staç |
| 4453 | 4427 | local recur male   | 4453    | 2 | tumor staç |
| 37   |      | female             | 37      | 2 | tumor staç |
| 482  | 178  | local recur male   | 482 4A  |   | tumor staç |
| 285  | 67   | local recur female | 285     | 2 | tumor staç |
|      |      | female             |         |   | tumor stag |
| 1021 | 318  | local recur female | 1021    | 2 | tumor staç |
| 3649 | 2760 | local recur male   | 3649    | 3 | tumor staç |
| 1353 |      | female             | 1353 4A |   | tumor staç |
| 2786 |      | male               | 2786 4A |   | tumor staç |
| 791  | 634  | local recur male   | 791 4A  |   | tumor staç |
| 95   | 65   | local recur male   | 95 4B   |   | tumor staç |

|      |                         |         |   |            |
|------|-------------------------|---------|---|------------|
| 770  | 139 local recur female  | 770     | 3 | tumor staç |
| 742  | 614 local recur male    | 742 4A  |   | tumor staç |
| 975  | 383 local recur male    | 975 4A  |   | tumor staç |
| 742  | 293 local recur female  | 742     | 3 | tumor staç |
| 2275 | 433 local recur male    | 2275    | 3 | tumor staç |
| 1022 | 364 local recur male    | 1022    | 3 | tumor staç |
| 525  | 149 local recur male    | 525     | 3 | tumor staç |
| 424  | male                    | 424     | 2 | tumor staç |
| 1040 | 656 local recur male    | 1040    | 3 | tumor staç |
| 3623 | female                  | 3623    |   | tumor staç |
| 3781 | male                    | 3781    |   | tumor staç |
| 423  | 346 local recur male    | 423     | 3 | tumor staç |
| 1969 | 303 local recur male    | 1969 4A |   | tumor staç |
| 1057 | 606 local recur male    | 1057 4A |   | tumor staç |
| 3436 | 1189 distant rec female | 3436    | 3 | tumor staç |
| 235  | 211 local recur male    | 235 4A  |   | tumor staç |
| 551  | 188 distant rec male    | 551 4A  |   | tumor staç |
| 1004 | 294 local recur male    | 1004 4A |   | tumor staç |
| 721  | 183 local recur male    | 721 4A  |   | tumor staç |
| 135  | 67 local recur female   | 135 4A  |   | tumor staç |
| 3534 | male                    | 3534 3A |   | tumor staç |
| 1041 | male                    | 1041    | 2 | tumor staç |
| 1011 | male                    | 1011    | 2 | tumor staç |
| 1229 | male                    | 1229    | 2 | tumor staç |
| 983  | male                    | 983     | 1 | tumor staç |
| 1141 | male                    | 1141    | 1 | tumor staç |
| 2257 | male                    | 2257 3A |   | tumor staç |
| 2431 | female                  | 2431    | 2 | tumor staç |
| 614  | male                    | 614     | 1 | tumor staç |
| 1272 | male                    | 1272    | 2 | tumor staç |
| 1970 | male                    | 1970 3A |   | tumor staç |
| 2141 | male                    | 2141    | 2 | tumor staç |
| 1188 | male                    | 1188    | 2 | tumor staç |
| 1983 | female                  | 1983    | 1 | tumor staç |
| 178  | female                  | 178     | 2 | tumor staç |
| 1782 | male                    | 1782    | 1 | tumor staç |
| 1752 | male                    | 1752    | 1 | tumor staç |
| 1752 | male                    | 1752    | 1 | tumor staç |
| 1451 | male                    | 1451    | 1 | tumor staç |
| 1539 | male                    | 1539    | 1 | tumor staç |
| 1467 | male                    | 1467    | 2 | tumor staç |
| 1029 | male                    | 1029    | 2 | tumor staç |
| 1436 | male                    | 1436    | 2 | tumor staç |
| 657  | male                    | 657     | 2 | tumor staç |
| 1438 | male                    | 1438    | 1 | tumor staç |
| 1233 | male                    | 1233    | 2 | tumor staç |
| 1193 | male                    | 1193 3A |   | tumor staç |
| 1187 | male                    | 1187    | 2 | tumor staç |
| 699  | male                    | 699     | 2 | tumor staç |
| 8    | male                    | 8       | 2 | tumor staç |
| 90   | male                    | 90 3A   |   | tumor staç |
| 617  | male                    | 617     | 1 | tumor staç |
| 570  | male                    | 570     | 2 | tumor staç |
| C22  | female                  | 390     | 2 | TNM by LC  |
| C22  | male                    | 780     | 3 | TNM by LC  |
| C22  | female                  | 870     | 2 | TNM by LC  |
| C22  | female                  | 180     | 3 | TNM by LC  |
| C22  | male                    | 1260    | 1 | TNM by LC  |

|       |      |                  |        |      |         |        |           |
|-------|------|------------------|--------|------|---------|--------|-----------|
| C22   |      |                  | male   | 1200 | 3       |        | TNM by LC |
| C22   |      |                  | male   | 1290 | 2       |        | TNM by LC |
| C22   |      |                  | male   | 1230 | 2       |        | TNM by LC |
| C22   |      |                  | male   | 20   | 3       |        | TNM by LC |
| C22   |      |                  | male   | 1200 | 2       |        | TNM by LC |
| C22   |      |                  | male   | 1320 | 2       |        | TNM by LC |
| C22   |      |                  | male   | 630  | 3       |        | TNM by LC |
| C22   |      |                  | male   | 1410 | 4       |        | TNM by LC |
| C22   |      |                  | male   | 1110 | 3       |        | TNM by LC |
| C22   |      |                  | female | 1320 | 1       |        | TNM by LC |
| C22   |      |                  | male   | 1080 | 3       |        | TNM by LC |
| C22   |      |                  | female | 1050 | 2       |        | TNM by LC |
| C22   |      |                  | male   | 1050 | 4       |        | TNM by LC |
| C22   |      |                  | male   | 1050 | 3       |        | TNM by LC |
| C22   |      |                  | male   | 1050 | 1       |        | TNM by LC |
| C22   |      |                  | female | 1020 | 2       |        | TNM by LC |
| C22   |      |                  | male   | 930  | 4       |        | TNM by LC |
| C22   |      |                  | male   | 180  | 4       |        | TNM by LC |
| C22   |      |                  | female | 900  | 3       |        | TNM by LC |
| C22   |      |                  | female | 960  | 1       |        | TNM by LC |
| C22   |      |                  | male   | 900  | 2       |        | TNM by LC |
| C22   |      |                  | male   | 840  | 2       |        | TNM by LC |
| C22   |      |                  | male   | 960  | 1       |        | TNM by LC |
| C22   |      |                  | male   | 930  | 2       |        | TNM by LC |
| C22   |      |                  | male   | 900  | 2       |        | TNM by LC |
| C22   |      |                  | male   | 450  | 2       |        | TNM by LC |
| C22   |      |                  | male   | 1110 | 1       |        | TNM by LC |
| C22   |      |                  | male   | 750  | 1       |        | TNM by LC |
| C22   |      |                  | male   | 930  | 2       |        | TNM by LC |
| C22   |      |                  | male   | 960  | 3       |        | TNM by LC |
| C22   |      |                  | male   | 1020 | 2       |        | TNM by LC |
| C22   |      |                  | male   | 960  | 2       |        | TNM by LC |
| C22   |      |                  | male   | 570  | 2       |        | TNM by LC |
| C22   |      |                  | male   | 1050 | 2       |        | TNM by LC |
| C22   |      |                  | male   | 1020 | 1       |        | TNM by LC |
| C22   |      |                  | female | 840  | 1       |        | TNM by LC |
| C22   |      |                  | male   | 990  | 3       |        | TNM by LC |
| C22   |      |                  | male   | 990  | 1       |        | TNM by LC |
| C22   |      |                  | male   | 150  | 3       |        | TNM by LC |
| C22   |      |                  | female | 810  | 1       |        | TNM by LC |
| C22.0 | 215  | 47 local recur   | female | 215  | T1N0M0  | BCLC:0 | TNM 7th e |
| C22.0 | 465  | 243 local recur  | male   | 465  | T2N0M0  | BCLC:A | TNM 7th e |
| C22.0 | 476  | 181 local recur  | male   | 476  | T2N0M0  | BCLC:A | TNM 7th e |
| C22.0 | 159  | 92 local recur   | male   | 159  | T2N0M0  | BCLC:A | TNM 7th e |
| C22.0 |      |                  | female |      |         |        |           |
| C22.0 | 1826 | 1213 local recur | male   | 1826 | T2N0M0  | BCLC:A | TNM 7th e |
| C22.0 | 781  | 477 local recur  | male   | 781  | T1N0M0  | BCLC:0 | TNM 7th e |
| C22.0 | 200  | 139 local recur  | male   | 200  | T3bN0M0 | BCLC:C | TNM 7th e |
| C22.0 | 704  | 368 local recur  | male   | 704  | T2N0M0  | BCLC:A | TNM 7th e |
| C22.0 | 1745 | 1745             | male   | 1745 | T1N0M0  | BCLC:A | TNM 7th e |
| C22.0 | 387  | 387              | female | 387  | T3bN0M0 | BCLC:C | TNM 7th e |
| C22.0 |      |                  | female |      |         |        |           |
| C22.0 | 491  | 491 local recur  | male   | 491  | T3bN0M0 | BCLC:C | TNM 7th e |
| C22.0 | 829  | 643 local recur  | male   | 829  | T3bN0M0 | BCLC:C | TNM 7th e |
| C22.0 | 32   | 32               | female | 32   | T1N0M0  | BCLC:A | TNM 7th e |
| C22.0 | 1125 | 398 local recur  | male   | 1125 | T3aN0M0 | BCLC:B | TNM 7th e |
| C22.0 | 923  | 321 local recur  | male   | 923  | T1N0M0  | BCLC:A | TNM 7th e |
| C22.0 |      |                  | male   |      |         |        |           |



|       |      |      |             |        |      |         |        |           |
|-------|------|------|-------------|--------|------|---------|--------|-----------|
| C22.0 |      |      |             | male   |      |         |        |           |
| C22.0 | 1013 | 1013 |             | male   | 1013 | T2N0M0  | BCLC:0 | TNM 7th e |
| C22.0 |      |      |             | male   |      |         |        |           |
| C22.0 |      |      |             | male   |      |         |        |           |
| C22.0 |      |      |             | male   |      |         |        |           |
| C22.0 | 876  | 876  |             | male   | 876  | T1N0M0  | BCLC:A | TNM 7th e |
| C22.0 |      |      |             | female |      |         |        |           |
| C22.0 | 1103 | 1103 |             | male   | 1103 | T2N0M0  | BCLC:A | TNM 7th e |
| C22.0 | 1826 | 1210 | local recur | male   | 1826 | T3bN0M0 | BCLC:C | TNM 7th e |
| C22.0 | 85   | 85   |             | male   | 85   | T2N0M0  | BCLC:A | TNM 7th e |
| C22.0 | 547  | 487  | local recur | male   | 547  | T3bN0M0 | BCLC:C | TNM 7th e |
| C22.0 | 1826 | 1826 |             | male   | 1826 | T3bN0M0 | BCLC:A | TNM 7th e |
| C22.0 | 1826 | 84   | local recur | male   | 1826 | T3aN0M0 | BCLC:A | TNM 7th e |
| C22.0 |      |      |             | male   |      |         |        |           |
| C22.0 | 1826 | 836  | local recur | female | 1826 | T2N0M0  | BCLC:A | TNM 7th e |
| C22.0 | 565  | 298  | local recur | male   | 565  | T2N0M0  | BCLC:A | TNM 7th e |
| C22.0 | 1312 | 609  | local recur | male   | 1312 | T3bN0M0 | BCLC:C | TNM 7th e |
| C22.0 | 1826 | 935  | local recur | male   | 1826 | T1N0M0  | BCLC:A | TNM 7th e |
| C22.0 |      |      |             | male   |      |         |        |           |
| C22.0 | 146  | 137  | local recur | male   | 146  | T3bN0M0 | BCLC:0 | TNM 7th e |
| C22.0 | 1826 | 1826 |             | female | 1826 | T1N0M0  | BCLC:A | TNM 7th e |
| C22.0 |      |      |             | female |      |         |        |           |
| C22.0 | 953  | 619  | local recur | male   | 953  | T1N0M0  | BCLC:A | TNM 7th e |
| C22.0 | 1826 | 1826 |             | male   | 1826 | T1N0M0  | BCLC:A | TNM 7th e |
| C22.0 | 1490 | 500  | local recur | female | 1490 | T1N0M0  | BCLC:A | TNM 7th e |
| C22.0 | 608  | 495  | local recur | male   | 608  | T1N0M0  | BCLC:A | TNM 7th e |
| C22.0 | 619  | 619  |             | male   | 619  | T2N0M0  | BCLC:A | TNM 7th e |
| C22.0 |      |      |             | male   |      |         |        |           |
| C22.0 | 275  | 63   | local recur | male   | 275  | T1N0M0  | BCLC:A | TNM 7th e |
| C22.0 | 513  | 188  | local recur | male   | 513  | T2N0M0  | BCLC:A | TNM 7th e |
| C22.0 | 365  | 365  | local recur | male   | 365  | T3bN0M0 | BCLC:C | TNM 7th e |
| C22.0 |      |      |             | male   |      |         |        |           |
| C22.0 | 30   | 30   |             | male   | 30   | T3bN0M0 | BCLC:C | TNM 7th e |
| C22.0 | 1399 | 1399 |             | female | 1399 | T1N0M0  | BCLC:A | TNM 7th e |
| C22.0 | 335  | 335  |             | female | 335  | T3aN0M0 | BCLC:B | TNM 7th e |
| C22.0 | 382  | 382  |             | female | 382  | T2N0M0  | BCLC:A | TNM 7th e |
| C22.0 | 1786 | 1482 | local recur | male   | 1786 | T1N0M0  | BCLC:A | TNM 7th e |
| C22.0 | 408  | 287  | local recur | male   | 408  | T1N0M0  | BCLC:0 | TNM 7th e |
| C22.0 | 157  | 157  | local recur | male   | 157  | T3bN0M0 | BCLC:C | TNM 7th e |
| C22.0 |      |      |             | male   |      |         |        |           |
| C22.0 | 442  | 255  | local recur | male   | 442  | T3bN0M0 | BCLC:C | TNM 7th e |
| C22.0 | 1826 | 1826 |             | male   | 1826 | T1N0M0  | BCLC:A | TNM 7th e |
| C22.0 | 1525 | 1344 | local recur | male   | 1525 | T2N0M0  | BCLC:B | TNM 7th e |
| C22.0 |      |      |             | male   |      |         |        |           |
| C22.0 | 13   | 13   |             | male   | 13   | T2N0M0  | BCLC:A | TNM 7th e |
| C22.0 |      |      |             | male   |      |         |        |           |
| C22.0 |      |      |             | male   |      |         |        |           |
| C22.0 | 1826 | 1826 |             | male   | 1826 | T2N0M0  | BCLC:A | TNM 7th e |
| C22.0 |      |      |             | female |      |         |        |           |
| C22.0 |      |      |             | female |      |         |        |           |
| C22.0 |      |      |             | male   |      |         |        |           |
| C22.0 | 994  | 994  | local recur | female | 994  | T2N0M0  | BCLC:A | TNM 7th e |
| C22.0 | 44   | 44   |             | male   | 44   | T2N0M0  | BCLC:B | TNM 7th e |
| C22.0 |      |      |             | male   |      |         |        |           |
| C22.0 | 1520 | 1520 |             | male   | 1520 | T2N0M0  | BCLC:A | TNM 7th e |
| C22.0 |      |      |             | male   |      |         |        |           |
| C22.0 | 1703 | 1041 | local recur | female | 1703 | T3bN0M0 | BCLC:C | TNM 7th e |
| C22.0 | 1119 | 804  | local recur | male   | 1119 | T2N0M0  | BCLC:A | TNM 7th e |

|       |      |                        |             |        |           |
|-------|------|------------------------|-------------|--------|-----------|
| C22.0 | 507  | 332 local recur male   | 507 T3aN0M0 | BCLC:B | TNM 7th e |
| C22.0 | 1826 | 690 local recur female | 1826 T2N0M0 | BCLC:A | TNM 7th e |
| C22.0 | 255  | 255 local recur male   | 255 T3aN0M0 | BCLC:B | TNM 7th e |
| C22.0 |      | male                   |             |        |           |
| C22.0 | 1826 | 786 local recur female | 1826 T1N0M0 | BCLC:A | TNM 7th e |
| C22.0 | 740  | 398 local recur male   | 740 T1N0M0  | BCLC:A | TNM 7th e |
| C22.0 | 234  | 172 local recur male   | 234 T1N0M0  | BCLC:A | TNM 7th e |
| C22.0 |      | male                   |             |        |           |
| C22.0 |      | male                   |             |        |           |
| C22.0 |      | male                   |             |        |           |
| C22.0 |      | male                   |             |        |           |
| C22.0 | 481  | 481 male               | 481 T1N0M0  | BCLC:A | TNM 7th e |
| C22.0 |      | female                 |             |        |           |
| C22.0 |      | male                   |             |        |           |
| C22.0 |      | male                   |             |        |           |
| C22.0 | 1339 | female                 |             |        |           |
| C22.0 | 1030 | female                 |             |        |           |
| C22.0 | 925  | male                   |             |        |           |
| C22.0 | 867  | male                   |             |        |           |
| C22.0 | 79   | male                   |             |        |           |
| C22.0 | 2017 | female                 |             |        |           |
| C22.0 | 27   | male                   |             |        |           |
| C22.0 | 254  | male                   |             |        |           |
| C22.0 | 136  | male                   |             |        |           |
| C22.0 | 111  | male                   |             |        |           |
| C22.0 | 204  | male                   |             |        |           |
| C22.0 | 0    | female                 |             |        |           |
| C22.0 | 1231 | female                 |             |        |           |
| C22.0 | 69   | male                   |             |        |           |
| C22.0 | 180  | male                   |             |        |           |
| C22.0 | 12   | male                   |             |        |           |
| C22.0 | 193  | male                   |             |        |           |
| C22.0 | 0    | male                   |             |        |           |
| C22.0 | 1175 | female                 |             |        |           |
| C22.0 | 4    | male                   |             |        |           |
| C22.0 | 421  | female                 |             |        |           |
| C22.0 | 252  | female                 |             |        |           |
| C22.0 | 97   | male                   |             |        |           |
| C22.0 | 693  | female                 |             |        |           |
| C22.0 | 0    | female                 |             |        |           |
| C22.0 | 662  | male                   |             |        |           |
| C22.0 | 1678 | female                 |             |        |           |
| C22.0 | 2415 | male                   |             |        |           |
| C22.0 | 1144 | female                 |             |        |           |
| C22.0 | 60   | female                 |             |        |           |
| C22.0 | 13   | male                   |             |        |           |
| C22.0 | 129  | male                   |             |        |           |
| C22.0 | 0    | male                   |             |        |           |
| C22.0 | 183  | male                   |             |        |           |
| C22.0 | 391  | female                 |             |        |           |
| C22.0 | 352  | male                   |             |        |           |
| C22.0 | 4    | female                 |             |        |           |
| C22.0 | 602  | female                 |             |        |           |
| C22.0 | 1036 | male                   |             |        |           |
| C22.0 | 8    | female                 |             |        |           |
| C22.0 | 887  | female                 |             |        |           |
| C22.0 | 1629 | male                   |             |        |           |
| C22.0 | 37   | male                   |             |        |           |

|       |      |                         |      |   |            |
|-------|------|-------------------------|------|---|------------|
| C22.0 | 111  | female                  |      |   |            |
| C22.0 | 0    | male                    |      |   |            |
| C22.0 | 1359 | male                    |      |   |            |
| C22.0 | -8   | female                  |      |   |            |
| C22.0 | 0    | male                    |      |   |            |
| C22.0 | 2    | male                    |      |   |            |
| C22.0 | 3    | male                    |      |   |            |
| C22.0 | 269  | male                    |      |   |            |
| C22.0 | 987  | female                  |      |   |            |
| C22.0 | 458  | female                  |      |   |            |
| C22.0 | 7    | female                  |      |   |            |
|       | 2305 | female                  | 2305 |   | tumor staç |
|       | 3004 | 457 local recur male    | 3004 |   | tumor staç |
|       | 775  | 426 local recur female  | 775  |   | tumor staç |
|       | 1954 | 1613 local recur male   | 1954 |   | tumor staç |
|       | 879  | 274 female              | 879  |   | tumor staç |
|       | 951  | 639 local recur male    | 951  |   | tumor staç |
|       | 2188 | female                  | 2188 |   | tumor staç |
|       | 1634 | 274 local recur male    | 1634 |   | tumor staç |
|       | 1768 | 700 local recur male    | 1768 |   | tumor staç |
|       | 1133 | 152 local recur female  | 1133 |   | tumor staç |
|       | 1905 | 1431 local recur male   | 1905 |   | tumor staç |
|       | 812  | 152 local recur female  | 812  |   | tumor staç |
|       | 1494 | female                  | 1494 |   | tumor staç |
|       | 2991 | 2405 local recur female | 2991 |   | tumor staç |
|       | 3100 | 122 local recur male    | 3100 |   | tumor staç |
|       | 4935 | 883 local recur female  | 4935 |   | tumor staç |
|       | 3275 | 2161 local recur male   | 3275 |   | tumor staç |
|       | 3064 | 1187 local recur male   | 3064 |   | tumor staç |
|       | 740  | 183 local recur male    | 740  |   | tumor staç |
|       | 4097 | 3074 local recur male   | 4097 |   | tumor staç |
|       | 1137 | 335 local recur male    | 1137 |   | tumor staç |
|       | 1679 | 183 local recur male    | 1679 |   | tumor staç |
|       | 5378 | 1278 local recur male   | 5378 |   | tumor staç |
|       | 3683 | male                    | 3683 |   | tumor staç |
|       | 5337 | 2070 local recur male   | 5337 |   | tumor staç |
|       | 5456 | male                    | 5456 |   | tumor staç |
|       | 904  | 244 male                | 904  |   | tumor staç |
|       | 1653 | 1644 local recur male   | 1653 |   | tumor staç |
|       | 603  | 244 local recur male    | 603  |   | tumor staç |
|       | 770  | 761 local recur male    | 770  |   | tumor staç |
|       | 4010 | 3409 local recur male   | 4010 |   | tumor staç |
| C22   |      | male                    | 1320 | 2 | TNM by LC  |
| C22   |      | male                    | 1200 | 4 | TNM by LC  |
| C22   |      | male                    | 720  | 2 | TNM by LC  |
| C22   |      | male                    | 1650 | 3 | TNM by LC  |
| C22   |      | male                    | 1620 | 2 | TNM by LC  |
| C22   |      | male                    | 1290 | 2 | TNM by LC  |
| C22   |      | male                    | 1620 | 3 | TNM by LC  |
| C22   |      | male                    | 1590 | 3 | TNM by LC  |
| C22   |      | male                    | 1680 | 2 | TNM by LC  |
| C22   |      | male                    | 450  | 3 | TNM by LC  |
| C22   |      | male                    | 1680 | 1 | TNM by LC  |
| C22   |      | female                  | 1710 | 2 | TNM by LC  |
| C22   |      | male                    | 1590 | 2 | TNM by LC  |
| C22   |      | male                    | 1590 | 2 | TNM by LC  |
| C22   |      | male                    | 1560 | 3 | TNM by LC  |
| C22   |      | male                    | 840  | 2 | TNM by LC  |

|     |        |      |   |           |
|-----|--------|------|---|-----------|
| C22 | female | 1110 | 2 | TNM by LC |
| C22 | male   | 510  | 3 | TNM by LC |
| C22 | male   | 1530 | 3 | TNM by LC |
| C22 | female | 570  | 2 | TNM by LC |
| C22 | male   | 1680 | 3 | TNM by LC |
| C22 | male   | 420  | 3 | TNM by LC |
| C22 | male   | 1470 | 3 | TNM by LC |
| C22 | male   | 360  | 4 | TNM by LC |
| C22 | male   | 660  | 3 | TNM by LC |
| C22 | male   | 1410 | 1 | TNM by LC |
| C22 | male   | 1320 | 1 | TNM by LC |
| C22 | male   | 1320 | 3 | TNM by LC |
| C22 | male   | 1320 | 2 | TNM by LC |
| C22 | male   | 1290 | 3 | TNM by LC |
| C22 | male   | 60   | 3 | TNM by LC |
| C22 | male   | 720  | 2 | TNM by LC |
| C22 | female | 1260 | 2 | TNM by LC |
| C22 | male   | 1230 | 3 | TNM by LC |
| C22 | female | 1380 | 2 | TNM by LC |
| C22 | male   | 2160 | 2 | TNM by LC |
| C22 | male   | 1980 | 2 | TNM by LC |
| C22 | male   | 1470 | 3 | TNM by LC |
| C22 | male   | 540  | 2 | TNM by LC |
| C22 | male   | 960  | 2 | TNM by LC |
| C22 | male   | 690  | 2 | TNM by LC |
| C22 | male   | 1440 | 2 | TNM by LC |
| C22 | male   | 1350 | 3 | TNM by LC |
| C22 | male   | 600  | 3 | TNM by LC |
| C22 | male   | 1170 | 3 | TNM by LC |
| C22 | male   | 1140 | 2 | TNM by LC |
| C22 | female | 1260 | 3 | TNM by LC |
| C22 | female | 600  | 2 | TNM by LC |
| C22 | female | 1200 | 2 | TNM by LC |
| C22 | female | 570  | 2 | TNM by LC |
| C22 | male   | 600  | 2 | TNM by LC |
| C22 | female | 1260 | 1 | TNM by LC |
| C22 | female | 1200 | 2 | TNM by LC |
| C22 | female | 1200 | 2 | TNM by LC |
| C22 | female | 120  | 4 | TNM by LC |
| C22 | male   | 390  | 1 | TNM by LC |
| C22 | male   | 1170 | 2 | TNM by LC |
| C22 | female | 1350 | 2 | TNM by LC |
| C22 | male   | 900  | 1 | TNM by LC |
| C22 | female | 1170 | 2 | TNM by LC |
| C22 | female | 90   | 2 | TNM by LC |
| C22 | male   | 1050 | 1 | TNM by LC |
| C22 | male   | 1350 | 4 | TNM by LC |
| C22 | male   | 240  | 3 | TNM by LC |
| C22 | male   | 1200 | 1 | TNM by LC |
| C22 | male   | 1170 | 2 | TNM by LC |
| C22 | female | 270  | 3 | TNM by LC |
| C22 | male   | 1080 | 2 | TNM by LC |
| C22 | female | 390  | 4 | TNM by LC |
| C22 | male   | 1020 | 4 | TNM by LC |
| C22 | male   | 1050 | 1 | TNM by LC |
| C22 | female | 1020 | 2 | TNM by LC |
| C22 | male   | 990  | 1 | TNM by LC |
| C22 | male   | 930  | 2 | TNM by LC |

|       |      |        |      |   |           |
|-------|------|--------|------|---|-----------|
| C22   |      | male   | 900  | 3 | TNM by LC |
| C22   |      | female | 900  | 1 | TNM by LC |
| C22   |      | male   | 900  | 2 | TNM by LC |
| C22   |      | male   | 870  | 2 | TNM by LC |
| C22   |      | male   | 1080 | 1 | TNM by LC |
| C22   |      | female | 930  | 3 | TNM by LC |
| C22   |      | female | 240  | 2 | TNM by LC |
| C22   |      | female | 210  | 2 | TNM by LC |
| C22   |      | male   | 630  | 1 | TNM by LC |
| C22   |      | female | 900  | 2 | TNM by LC |
| C22   |      | male   | 870  | 2 | TNM by LC |
| C22   |      | male   | 720  | 3 | TNM by LC |
| C22   |      | male   | 810  | 3 | TNM by LC |
| C22   |      | male   | 330  | 3 | TNM by LC |
| C22   |      | male   | 990  | 3 | TNM by LC |
| C22   |      | male   | 270  | 3 | TNM by LC |
| C22   |      | male   | 1020 | 3 | TNM by LC |
| C22   |      | male   | 570  | 3 | TNM by LC |
| C22   |      | male   | 750  | 3 | TNM by LC |
| C22   |      | male   | 480  | 2 | TNM by LC |
| C22   |      | male   | 10   | 3 | TNM by LC |
| C22   |      | male   | 600  | 3 | TNM by LC |
| C22   |      | male   | 1290 | 3 | TNM by LC |
| C22   |      | male   | 750  | 4 | TNM by LC |
| C22   |      | male   | 510  | 3 | TNM by LC |
| C22   |      | male   | 480  | 3 | TNM by LC |
| C22   |      | male   | 390  | 1 | TNM by LC |
| C22   |      | female | 360  | 3 | TNM by LC |
| C22   |      | male   | 570  | 3 | TNM by LC |
| C22   |      | male   | 450  | 3 | TNM by LC |
| C22   |      | male   | 300  | 2 | TNM by LC |
| C22   |      | female | 1260 | 4 | TNM by LC |
| C22   |      | female | 1440 | 1 | TNM by LC |
| C22   |      | male   | 1440 | 2 | TNM by LC |
| C22   |      | female | 990  | 3 | TNM by LC |
| C22   |      | male   | 300  | 4 | TNM by LC |
| C22   |      | female | 240  | 4 | TNM by LC |
| C22   |      | male   | 30   | 3 | TNM by LC |
| C22.0 | 2018 | male   |      |   |           |
| C22.0 | 12   | male   |      |   |           |
| C22.0 | 16   | male   |      |   |           |
| C22.0 | 445  | male   |      |   |           |
| C22.0 | 5    | female |      |   |           |
| C22.0 | 1    | female |      |   |           |
| C22.0 | 6    | male   |      |   |           |
| C22.0 | 6    | female |      |   |           |
| C22.0 | 433  | female |      |   |           |
| C22.0 | 1836 | male   |      |   |           |
| C22.0 | 0    | male   |      |   |           |
| C22.0 | 120  | male   |      |   |           |
| C22.0 | 1008 | female |      |   |           |
| C22.0 | 1711 | male   |      |   |           |
| C22.0 | 364  | male   |      |   |           |
| C22.0 | 3    | male   |      |   |           |
| C22.0 | 428  | male   |      |   |           |
| C22.0 | 2849 | male   |      |   |           |
| C22.0 | 289  | male   |      |   |           |
| C22.0 | 10   | female |      |   |           |

|       |      |        |      |   |           |
|-------|------|--------|------|---|-----------|
| C22.0 | 7    | male   |      |   |           |
| C22.0 | 243  | male   |      |   |           |
| C22.0 | 2141 | female |      |   |           |
| C22.0 | 133  | male   |      |   |           |
| C22   |      | male   | 450  | 2 | TNM by LC |
| C22   |      | male   | 1260 | 2 | TNM by LC |
| C22   |      | male   | 1140 | 3 | TNM by LC |
| C22   |      | male   | 1200 | 2 | TNM by LC |
| C22   |      | male   | 900  | 2 | TNM by LC |
| C22   |      | female | 120  | 3 | TNM by LC |
| C22   |      | female | 810  | 3 | TNM by LC |
| C22   |      | male   | 990  | 3 | TNM by LC |
| C22   |      | female | 120  | 2 | TNM by LC |
| C22   |      | male   | 900  | 2 | TNM by LC |
| C22   |      | male   | 900  | 2 | TNM by LC |
| C22   |      | female | 900  | 3 | TNM by LC |
| C22   |      | male   | 900  | 2 | TNM by LC |
| C22   |      | male   | 840  | 2 | TNM by LC |
| C22   |      | male   | 720  | 2 | TNM by LC |
| C22   |      | female | 810  | 2 | TNM by LC |
| C22   |      | female | 810  | 2 | TNM by LC |
| C22   |      | male   | 780  | 2 | TNM by LC |
| C22   |      | male   | 750  | 2 | TNM by LC |
| C22   |      | female | 750  | 3 | TNM by LC |
| C22   |      | male   | 870  | 2 | TNM by LC |
| C22   |      | male   | 900  | 1 | TNM by LC |
| C22   |      | male   | 810  | 2 | TNM by LC |
| C22   |      | female | 690  | 2 | TNM by LC |
| C22   |      | male   | 720  | 2 | TNM by LC |
| C22   |      | male   | 180  | 4 | TNM by LC |
| C22   |      | male   | 690  | 2 | TNM by LC |
| C22   |      | female | 570  | 2 | TNM by LC |
| C22   |      | female | 900  | 1 | TNM by LC |
| C22   |      | male   | 600  | 1 | TNM by LC |
| C22   |      | male   | 780  | 1 | TNM by LC |
| C22   |      | female | 390  | 2 | TNM by LC |
| C22   |      | female | 150  | 2 | TNM by LC |
| C22   |      | female | 630  | 2 | TNM by LC |
| C22   |      | male   | 630  | 3 | TNM by LC |
| C22   |      | male   | 600  | 2 | TNM by LC |
| C22   |      | female | 600  | 1 | TNM by LC |
| C22   |      | male   | 720  | 1 | TNM by LC |
| C22   |      | male   | 780  | 4 | TNM by LC |
| C22   |      | male   | 240  | 3 | TNM by LC |
| C22   |      | male   | 600  | 2 | TNM by LC |
| C22   |      | female | 570  | 2 | TNM by LC |
| C22   |      | male   | 570  | 3 | TNM by LC |
| C22   |      | male   | 540  | 3 | TNM by LC |
| C22   |      | male   | 480  | 2 | TNM by LC |
| C22   |      | male   | 510  | 3 | TNM by LC |
| C22   |      | female | 480  | 3 | TNM by LC |
| C22   |      | male   | 720  | 3 | TNM by LC |
| C22   |      | female | 690  | 2 | TNM by LC |
| C22   |      | male   | 870  | 2 | TNM by LC |
| C22.0 | 302  | male   |      |   |           |
| C22.0 | 6    | female |      |   |           |
| C22.0 | 1869 | male   |      |   |           |
| D13.4 |      | male   |      |   |           |

|       |      |                 |        |      |        |
|-------|------|-----------------|--------|------|--------|
| D13.4 |      |                 | male   |      |        |
| D13.4 |      |                 | female |      |        |
| D13.4 |      |                 | female |      |        |
| D13.4 |      |                 | female |      |        |
| D13.4 |      |                 | female |      |        |
| D13.4 |      |                 | female |      |        |
| D13.4 |      |                 | female |      |        |
| D13.4 |      |                 | female |      |        |
| D13.4 |      |                 | female |      |        |
| D13.4 |      |                 | female |      |        |
| D13.4 |      |                 | female |      |        |
| D13.4 |      |                 | female |      |        |
| D13.4 |      |                 | female |      |        |
| D13.4 |      |                 | male   |      |        |
| D13.4 |      |                 | male   |      |        |
| D13.4 |      |                 | female |      |        |
| D13.4 |      |                 | female |      |        |
| D13.4 |      |                 | female |      |        |
| D13.4 |      |                 | female |      |        |
| D13.4 |      |                 | female |      |        |
| D13.4 |      |                 | female |      |        |
| D13.4 |      |                 | female |      |        |
| C22.0 | 0    |                 | male   |      |        |
| D13.4 |      |                 | female |      |        |
| D13.4 |      |                 | female |      |        |
| D13.4 |      |                 | female |      |        |
| D13.4 |      |                 | female |      |        |
| D13.4 |      |                 | female |      |        |
| D13.4 |      |                 | male   |      |        |
| D13.4 |      |                 | male   |      |        |
| C22.0 | 328  |                 | male   |      |        |
| C22.0 | 3071 |                 | female |      |        |
| C22.0 | 447  |                 | male   |      |        |
| C22.0 | 6    |                 | female |      |        |
| C22.0 | 334  |                 | male   |      |        |
| C22.0 | 6    |                 | female |      |        |
| C22.0 | 44   |                 | male   |      |        |
| C22.0 | 6    |                 | male   |      |        |
| C22.0 | 6    |                 | male   |      |        |
| C22.0 | 334  |                 | female |      |        |
| C22.0 | 6    |                 | male   |      |        |
| C22.0 | 391  |                 | male   |      |        |
| C22.0 | 6    |                 | female |      |        |
| C22.0 | 6    |                 | female |      |        |
| C22.0 | 236  |                 | male   |      |        |
| C22.0 | 6    |                 | female |      |        |
| C22.0 | 843  |                 | female |      |        |
| C22.0 | 230  |                 | female |      |        |
| C22.0 | 6    |                 | female |      |        |
| C22.0 | 122  |                 | male   |      |        |
| C22.0 | 216  |                 | male   |      |        |
| C22.0 | 196  | 145 local recur | male   | 196  | BCLC:A |
| C22.0 | 1826 | 875 local recur | male   | 1826 | BCLC:A |
| C22.0 | 1715 | 364 local recur | male   | 1715 | BCLC:A |
| C22.0 | 1142 | 244 local recur | male   | 1142 | BCLC:A |
| C22.0 | 189  | 119 local recur | female | 189  | BCLC:A |
| C22.0 | 1826 | 417 local recur | male   | 1826 | BCLC:A |
| C22.0 | 1036 | 379 local recur | male   | 1036 | BCLC:A |

|       |      |                         |      |        |           |
|-------|------|-------------------------|------|--------|-----------|
| C22.0 | 985  | 740 local recur male    | 985  | BCLC:A |           |
| C22.0 | 1826 | 1717 local recur female | 1826 | BCLC:A |           |
| C22.0 | 636  | 163 local recur female  | 636  | BCLC:B |           |
| C22.0 | 871  | 371 local recur male    | 871  | BCLC:A |           |
| C22.0 | 619  | 244 local recur male    | 619  | BCLC:A |           |
| C22.0 | 684  | 251 local recur male    | 684  | BCLC:A |           |
| C22.0 | 226  | 110 local recur male    | 226  | BCLC:A |           |
| C22.0 | 1325 | 77 local recur male     | 1325 | BCLC:A |           |
| C22.0 | 1826 | 610 local recur male    | 1826 | BCLC:A |           |
| C22.0 | 751  | 725 local recur male    | 751  | BCLC:A |           |
| C22.0 | 905  | 193 local recur male    | 905  | BCLC:A |           |
| C22.0 | 1826 | 89 local recur male     | 1826 | BCLC:C |           |
| C22.0 | 1826 | 235 local recur female  | 1826 | BCLC:O |           |
| C22.0 | 495  | 283 local recur male    | 495  | BCLC:A |           |
| C22.0 | 1826 | 300 local recur male    | 1826 | BCLC:A |           |
| C22.0 | 297  | 120 local recur female  | 297  | BCLC:A |           |
| C22.0 | 1541 | 393 local recur male    | 1541 | BCLC:A |           |
| C22.0 | 314  | 125 local recur female  | 314  | BCLC:A |           |
| C22.0 | 1369 | 87 local recur male     | 1369 | BCLC:A |           |
| C22.0 | 590  | 247 local recur male    | 590  | BCLC:A |           |
| C22.0 | 875  | 325 local recur female  | 875  | BCLC:A |           |
| C22.0 | 114  | 50 local recur female   | 114  | BCLC:B |           |
| C22.0 | 788  | 357 local recur female  | 788  | BCLC:A |           |
| C22.0 | 352  | 241 local recur male    | 352  | BCLC:A |           |
| C22.0 | 323  | 124 local recur male    | 323  | BCLC:B |           |
| C22.0 | 580  | 308 local recur male    | 580  | BCLC:B |           |
| C22.0 | 1303 | 254 local recur male    | 1303 | BCLC:A |           |
| C22.0 | 976  | 694 local recur male    | 976  | BCLC:A |           |
| C22.0 | 706  | 298 local recur male    | 706  | BCLC:A |           |
| C22   |      | male                    | 660  | 1      | TNM by LC |
| C22.0 | 1030 | 429 local recur male    | 1030 | BCLC:A |           |
| C22   |      | female                  | 720  | 2      | TNM by LC |
| C22.0 | 1528 | 363 local recur female  | 1528 | BCLC:A |           |
| C22   |      | male                    | 690  | 1      | TNM by LC |
| C22.0 | 1105 | 312 local recur male    | 1105 | BCLC:A |           |
| C22   |      | male                    | 630  | 4      | TNM by LC |
| C22.0 | 984  | 546 local recur male    | 984  | BCLC:A |           |
| C22   |      | male                    | 660  | 4      | TNM by LC |
| C22.0 | 454  | 250 local recur female  | 454  | BCLC:C |           |
| C22.0 | 1826 | 606 local recur male    | 1826 | BCLC:A |           |
| C22   |      | male                    | 480  | 3      | TNM by LC |
| C22.0 | 1324 | 298 local recur male    | 1324 | BCLC:A |           |
| C22   |      | male                    | 90   | 4      | TNM by LC |
| C22.0 | 671  | 329 local recur male    | 671  | BCLC:A |           |
| C22   |      | male                    | 480  | 3      | TNM by LC |
| C22.0 | 616  | 287 local recur female  | 616  | BCLC:A |           |
| C22   |      | female                  | 570  | 2      | TNM by LC |
| C22.0 | 694  | 43 local recur male     | 694  | BCLC:A |           |
| C22   |      | female                  | 480  | 1      | TNM by LC |
| C22.0 | 187  | 39 local recur male     | 187  | BCLC:A |           |
| C22   |      | male                    | 540  | 4      | TNM by LC |
| C22.0 | 217  | 126 local recur male    | 217  | BCLC:C |           |
| C22.0 | 879  | 606 local recur male    | 879  | BCLC:B |           |
| C22   |      | male                    | 540  | 2      | TNM by LC |
| C22.0 | 255  | 137 local recur male    | 255  | BCLC:A |           |
| C22   |      | male                    | 30   | 3      | TNM by LC |
| C22   |      | female                  | 540  | 2      | TNM by LC |
| C22   |      | male                    | 510  | 2      | TNM by LC |



|       |      |                  |        |             |        |  |           |
|-------|------|------------------|--------|-------------|--------|--|-----------|
| C22   |      |                  | male   | 930         | 2      |  | TNM by LC |
| C22   |      |                  | female | 540         | 1      |  | TNM by LC |
| C22   |      |                  | male   | 720         | 2      |  | TNM by LC |
| C22   |      |                  | male   | 690         | 2      |  | TNM by LC |
| C22   |      |                  | male   | 540         | 4      |  | TNM by LC |
| C22   |      |                  | male   | 540         | 1      |  | TNM by LC |
| C22   |      |                  | male   | 570         | 2      |  | TNM by LC |
| C22   |      |                  | male   | 720         | 3      |  | TNM by LC |
| C22.0 |      |                  | female |             |        |  |           |
| C22   |      |                  | male   | 450         | 1      |  | TNM by LC |
| C22.0 | 1147 | 1147             | male   | 1147 T2N0M0 | BCLC:A |  | TNM 7th e |
| C22   |      |                  | male   | 420         | 2      |  | TNM by LC |
| C22   |      |                  | male   | 420         | 3      |  | TNM by LC |
| C22   |      |                  | male   | 150         | 3      |  | TNM by LC |
| C22   |      |                  | male   | 390         | 2      |  | TNM by LC |
| C22   |      |                  | male   | 390         | 2      |  | TNM by LC |
| C22   |      |                  | male   | 510         | 2      |  | TNM by LC |
| C22   |      |                  | female | 510         | 2      |  | TNM by LC |
| C22   |      |                  | female | 510         | 3      |  | TNM by LC |
| C22.0 | 1510 | 1510             | male   | 1510 T2N0M0 | BCLC:A |  | TNM 7th e |
| C22   |      |                  | male   | 510         | 2      |  | TNM by LC |
| C22.0 | 1826 | 1826             | male   | 1826 T2N0M0 | BCLC:A |  | TNM 7th e |
| C22.0 | 1312 | 1312             | male   | 1312 T2N0M0 | BCLC:A |  | TNM 7th e |
| C22   |      |                  | male   | 390         | 2      |  | TNM by LC |
| C22.0 |      |                  | male   |             |        |  |           |
| C22   |      |                  | female | 480         | 2      |  | TNM by LC |
| C22.0 |      |                  | male   |             |        |  |           |
| C22   |      |                  | male   | 570         | 3      |  | TNM by LC |
| C22.0 | 144  | 113 local recur  | male   | 144 T3bN0M0 | BCLC:C |  | TNM 7th e |
| C22   |      |                  | male   | 510         | 2      |  | TNM by LC |
| C22   |      |                  | male   | 90          | 3      |  | TNM by LC |
| C22.0 | 1826 | 970 local recur  | male   | 1826 T1N0M0 | BCLC:0 |  | TNM 7th e |
| C22   |      |                  | male   | 540         | 2      |  | TNM by LC |
| C22.0 |      |                  | male   |             |        |  |           |
| C22.0 | 1826 | 1826             | female | 1826 T2N0M0 | BCLC:A |  | TNM 7th e |
| C22   |      |                  | female | 480         | 1      |  | TNM by LC |
| C22.0 |      |                  | male   |             |        |  |           |
| C22   |      |                  | female | 330         | 3      |  | TNM by LC |
| C22   |      |                  | male   | 330         | 2      |  | TNM by LC |
| C22.0 | 1826 | 1826             | male   | 1826 T2N0M0 | BCLC:A |  | TNM 7th e |
| C22   |      |                  | female | 300         | 4      |  | TNM by LC |
| C22.0 | 1826 | 1826 local recur | male   | 1826 T1N0M0 | BCLC:A |  | TNM 7th e |
| C22   |      |                  | male   | 300         | 4      |  | TNM by LC |
| C22   |      |                  | male   | 210         | 3      |  | TNM by LC |
| C22.0 | 352  | 49 local recur   | male   | 352 T3bN0M0 | BCLC:C |  | TNM 7th e |
| C22.0 |      |                  | male   |             |        |  |           |
| C22   |      |                  | male   | 480         | 3      |  | TNM by LC |
| C22.0 | 560  | 384 local recur  | male   | 560 T2N0M0  | BCLC:A |  | TNM 7th e |
| C22   |      |                  | male   | 720         | 3      |  | TNM by LC |
| C22   |      |                  | male   | 540         | 2      |  | TNM by LC |
| C22.0 |      |                  | female |             |        |  |           |
| C22.0 |      |                  | female |             |        |  |           |
| C22.0 |      |                  | male   |             |        |  |           |
| C22   |      |                  | male   | 570         | 2      |  | TNM by LC |
| C22.0 | 295  | 284 local recur  | male   | 295 T2N0M0  | BCLC:A |  | TNM 7th e |
| C22   |      |                  | male   | 210         | 2      |  | TNM by LC |
| C22.0 |      |                  | male   |             |        |  |           |
| C22   |      |                  | male   | 180         | 2      |  | TNM by LC |

|       |      |                  |        |              |        |           |
|-------|------|------------------|--------|--------------|--------|-----------|
| C22.0 |      |                  | male   |              |        |           |
| C22.0 |      |                  | male   |              |        |           |
| C22.0 | 1826 | 986 local recur  | female | 1826 T2N0M0  | BCLC:A | TNM 7th e |
| C22.0 | 890  | 159 local recur  | male   | 890 T2N0M0   | BCLC:A | TNM 7th e |
| C22.0 |      |                  | male   |              |        |           |
| C22.0 | 1826 | 1826             | male   | 1826 T3bN0M0 | BCLC:C | TNM 7th e |
| C22.0 |      |                  | male   |              |        |           |
| C22.0 | 1826 | 1826             | female | 1826 T2N0M0  | BCLC:0 | TNM 7th e |
| C22.0 |      |                  | female |              |        |           |
| C22.0 | 1826 | 1826             | male   | 1826 T3bN0M0 | BCLC:A | TNM 7th e |
| C22.0 | 1077 | 483 local recur  | male   | 1077 T1N0M0  | BCLC:A | TNM 7th e |
| C22.0 | 192  | 110 local recur  | male   | 192 T3bN0M0  | BCLC:C | TNM 7th e |
| C22.0 |      |                  | female |              |        |           |
| C22.0 |      |                  | male   |              |        |           |
| C22.0 | 1092 | 1092             | male   | 1092 T1N0M0  | BCLC:A | TNM 7th e |
| C22.0 |      |                  | male   |              |        |           |
| C22.0 |      |                  | male   |              |        |           |
| C22.0 |      |                  | male   |              |        |           |
| C22.0 | 74   | 74               | male   | 74 T1N0M0    | BCLC:A | TNM 7th e |
| C22.0 |      |                  | female |              |        |           |
| C22.0 | 757  | 757              | male   | 757 T2N0M0   | BCLC:A | TNM 7th e |
| C22.0 |      |                  | male   |              |        |           |
| C22.0 |      |                  | male   |              |        |           |
| C22.0 | 1214 | 1214             | male   | 1214 T2N0M0  | BCLC:A | TNM 7th e |
| C22.0 |      |                  | male   |              |        |           |
| C22.0 | 1217 | 1217             | male   | 1217 T3aN0M0 | BCLC:B | TNM 7th e |
| C22.0 | 195  | 195              | male   | 195 T2N0M0   | BCLC:B | TNM 7th e |
| C22.0 | 1357 | 1357             | male   | 1357 T2N0M0  | BCLC:A | TNM 7th e |
| C22.0 |      |                  | male   |              |        |           |
| C22.0 |      |                  | male   |              |        |           |
| C22.0 | 1085 | 1085             | male   | 1085 T1N0M0  | BCLC:A | TNM 7th e |
| C22.0 | 423  | 423              | male   | 423 T2N0M0   | BCLC:A | TNM 7th e |
| C22.0 |      |                  | female |              |        |           |
| C22.0 |      |                  | female |              |        |           |
| C22.0 |      |                  | male   |              |        |           |
| C22.0 | 1668 | 1668             | male   | 1668 T2N0M0  | BCLC:B | TNM 7th e |
| C22.0 |      |                  | male   |              |        |           |
| C22.0 |      |                  | male   |              |        |           |
| C22.0 | 1826 | 1826             | female | 1826 T1N0M0  | BCLC:A | TNM 7th e |
| C22.0 |      |                  | male   |              |        |           |
| C22.0 |      |                  | male   |              |        |           |
| C22.0 |      |                  | male   |              |        |           |
| C22.0 | 1612 | 1026 local recur | male   | 1612 T2N0M0  | BCLC:A | TNM 7th e |
| C22.0 |      |                  | male   |              |        |           |
| C22.0 |      |                  | female |              |        |           |
| C22.0 |      |                  | male   |              |        |           |
| C22.0 |      |                  | male   |              |        |           |
| C22.0 |      |                  | male   |              |        |           |
| C22.0 | 1826 | 611 local recur  | male   | 1826 T2N0M0  | BCLC:A | TNM 7th e |
| C22.0 | 1193 | 1096 local recur | male   | 1193 T3aN0M0 | BCLC:B | TNM 7th e |
| C22.0 |      |                  | male   |              |        |           |
| C22.0 |      |                  | male   |              |        |           |
| C22.0 |      |                  | male   |              |        |           |
| C22.0 |      |                  | male   |              |        |           |
| C22.0 |      |                  | male   |              |        |           |
| C22.0 |      |                  | male   | T2N0M0       | BCLC:A | TNM 7th e |
| C22.0 | 1050 | 1050             | male   | 1050 T2N0M0  | BCLC:B | TNM 7th e |
| C22.0 | 449  | 261 local recur  | male   | 449 T2N0M0   | BCLC:C | TNM 7th e |

|       |      |                  |        |              |        |           |
|-------|------|------------------|--------|--------------|--------|-----------|
| C22.0 | 953  | 934 local recur  | male   | 953 T1N0M0   | BCLC:A | TNM 7th e |
| C22.0 | 1063 | 1063             | female | 1063 T1N0M0  | BCLC:A | TNM 7th e |
| C22.0 |      |                  | male   |              |        |           |
| C22.0 | 331  | 30 local recur   | male   | 331 T3bN0M0  | BCLC:B | TNM 7th e |
| C22.0 | 412  | 412              | male   | 412 T1N0M0   | BCLC:A | TNM 7th e |
| C22.0 | 308  | 30 local recur   | male   | 308 T2N0M0   | BCLC:C | TNM 7th e |
| C22.0 |      |                  | male   |              |        |           |
| C22.0 | 420  | 420              | male   | 420 T2N0M0   | BCLC:A | TNM 7th e |
| C22.0 |      |                  | female |              |        |           |
| C22.0 |      |                  | female |              |        |           |
| C22.0 |      |                  | male   |              |        |           |
| C22.0 |      |                  | male   |              |        |           |
| C22.0 | 690  | 30 local recur   | male   | 690 T3aN0M0  | BCLC:B | TNM 7th e |
| C22.0 |      |                  | female |              |        |           |
| C22.0 | 223  | 223              | female | 223 T3bN0M0  | BCLC:C | TNM 7th e |
| C22.0 |      |                  | male   |              |        |           |
| C22.0 | 227  | 30 local recur   | female | 227 T3bN0M0  | BCLC:B | TNM 7th e |
| C22.0 |      |                  | male   |              |        |           |
| C22.0 |      |                  | male   |              |        |           |
| C22.0 | 560  | 560 local recur  | female | 560 T4N0M1   | BCLC:B | TNM 7th e |
| C22.0 | 140  | 140              | male   | 140 T1N0M0   | BCLC:A | TNM 7th e |
| C22.0 | 383  | 383              | male   | 383 T1N0M0   | BCLC:A | TNM 7th e |
| C22.0 | 444  | 214 local recur  | male   | 444 T3aN0M0  | BCLC:A | TNM 7th e |
| C22.0 |      |                  | male   | T3bN0M0      | BCLC:C | TNM 7th e |
| C22.0 |      |                  | male   | T2N0M0       | BCLC:B | TNM 7th e |
| C22.0 |      |                  | male   | T2N0M0       | BCLC:A | TNM 7th e |
| C22.0 |      |                  | male   |              |        |           |
| C22.0 | 1826 | 1826             | male   | 1826 T1N0M0  | BCLC:A | TNM 7th e |
| C22.0 | 1826 | 1826             | female | 1826 T1N0M0  | BCLC:A | TNM 7th e |
| C22.0 | 1826 | 1826             | male   | 1826 T2N0M0  | BCLC:A | TNM 7th e |
| C22.0 | 1499 | 1410 local recur | male   | 1499 T3aN0M0 | BCLC:B | TNM 7th e |
| C22.0 |      |                  | male   |              |        |           |
| C22.0 | 349  | 165 local recur  | male   | 349 T3bN0M0  | BCLC:B | TNM 7th e |
| C22.0 |      |                  | male   |              |        |           |
| C22.0 | 1826 | 394 local recur  | female | 1826 T2N0M0  | BCLC:A | TNM 7th e |
| C22.0 | 1429 | 1429             | male   | 1429 T1N0M0  | BCLC:A | TNM 7th e |
| C22.0 | 1826 | 1826             | male   | 1826 T1N0M0  | BCLC:A | TNM 7th e |
| C22.0 | 1392 | 1392 local recur | male   | 1392 T2N0M0  | BCLC:A | TNM 7th e |
| C22.0 |      |                  | male   |              |        |           |
| C22.0 |      |                  | male   |              |        |           |
| C22.0 |      |                  | female |              |        |           |
| C22.0 | 1514 | 420 local recur  | male   | 1514 T3bN0M0 | BCLC:C | TNM 7th e |
| C22.0 |      |                  | male   |              |        |           |
| C22.0 | 1440 | 1440             | male   | 1440 T1N0M0  | BCLC:A | TNM 7th e |
| C22.0 |      |                  | male   |              |        |           |
| C22.0 | 213  | 135 local recur  | male   | 213 T1N0M0   | BCLC:A | TNM 7th e |
| C22.0 | 227  |                  | female |              |        |           |
| C22.0 | 0    |                  | male   |              |        |           |
| C22.0 | 6    |                  | male   |              |        |           |
| C22.0 | 182  |                  | male   |              |        |           |
| C22.0 | 360  |                  | male   |              |        |           |
| C22.0 | 407  |                  | female |              |        |           |
| C22.0 | 15   |                  | female |              |        |           |
| C22.0 | 180  |                  | male   |              |        |           |
| C22.0 | 130  |                  | male   |              |        |           |
| C22.0 | 291  |                  | male   |              |        |           |
| C22.0 | 155  |                  | male   |              |        |           |
| C22.0 | 433  |                  | male   |              |        |           |

|       |      |        |
|-------|------|--------|
| C22.0 | 391  | male   |
| C22.0 | 265  | male   |
| C22.0 | 52   | male   |
| C22.0 | 498  | male   |
| C22.0 | 135  | male   |
| C22.0 | 395  | female |
| C22.0 | 1066 | female |
| C22.0 | 2258 | male   |
| C22.0 | 328  | male   |
| C22.0 | 322  | male   |
| C22.0 | 20   | male   |
| C22.0 | 409  | female |
| C22.0 | 146  | male   |
| C22.0 | 20   | male   |
| C22.0 | 0    | female |
| C22.0 | 0    | male   |
| C22.0 | 0    | female |
| C22.0 | 0    | female |
| C22.0 | 0    | female |
| C22.0 | 347  | male   |
| C22.0 | 2000 | male   |
| C22.0 | 1800 | female |
| C22.0 | 1931 | male   |
| C22.0 | 1618 | male   |
| C22.0 | 1828 | male   |
| C22.0 | 9    | male   |
| C22.0 | 58   | female |
| C22.0 | 1769 | male   |
| C22.0 | 400  | male   |
| C22.0 | 429  | male   |
| C22.0 | 1475 | male   |
| C22.0 | 1240 | male   |
| C22.0 | 1157 | male   |
| C22.0 | 170  | male   |
| C22.0 | 137  | female |
| C22.0 | 564  | female |
| C22.0 | 658  | male   |
| C22.0 | 1029 | male   |
| C22.0 | 1037 | male   |
| C22.0 | 672  | male   |
| C22.0 | 959  | female |
| C22.0 | 930  | female |
| C22.0 | 890  | male   |
| C22.0 | 864  | male   |
| C22.0 | 763  | female |
| C22.0 | 730  | female |
| C22.0 | 734  | female |

|       |      |        |
|-------|------|--------|
| C22.0 | 636  | male   |
| C22.0 | 527  | male   |
| C22.0 | 92   | male   |
| C22.0 | 120  | male   |
| C22.0 | 161  | male   |
| C22.0 | 1742 | male   |
| C22.0 | 216  | male   |
| C22.0 | 252  | male   |
| C22.0 | 203  | male   |
| C22.0 | 294  | female |
| C22.0 | 300  | female |
| C22.0 | 293  | male   |
| C22.0 | 288  | male   |
| C22.0 | 300  | male   |
| C22.0 | 259  | female |
| C22.0 | 141  | female |
| C22.0 | 382  | male   |
| C22.0 | 344  | male   |
| C22.0 | 386  | male   |
| C22.0 | 450  | male   |
| C22.0 | 370  | male   |
| C22.0 | 470  | male   |
| C22.0 | 498  | male   |
| C22.0 | 476  | female |
| C22.0 | 476  | male   |
| C22.0 | 1067 | male   |
| C22.0 | 2405 | male   |
| C22.0 | 2406 | male   |
| C22.0 | 2198 | male   |
| C22.0 | 1823 | male   |
| C22.0 | 1882 | male   |
| C22.0 | 1867 | male   |
| C22.0 | 1718 | male   |
| C22.0 | 1788 | male   |
| C22.0 | 1699 | male   |
| C22.0 | 1644 | male   |
| C22.0 | 1505 | male   |
| C22.0 | 1451 | male   |
| C22.0 | 0    | male   |
| C22.0 | 366  | female |
| C22.0 | 0    | male   |
| C22.0 | 342  | male   |
| C22.0 | 260  | male   |
| C22.0 | 295  | male   |
| C22.0 | 279  | female |
| C22.0 | 92   | male   |
| C22.0 | 240  | male   |
| C22.0 | 120  | male   |
| C22.0 | 741  | male   |
| C22.0 | 62   | male   |
| C22.0 | 640  | female |
| C22.0 | 579  | male   |
| C22.0 | 468  | male   |
| C22.0 | 472  | male   |
| C22.0 | 734  | male   |
| C22.0 | 455  | female |
| C22.0 | 526  | male   |
| C22.0 | 438  | male   |

|        |      |        |      |
|--------|------|--------|------|
| C22.0  | 486  | male   |      |
| C22.0  | 253  | male   |      |
| C22.0  | 139  | female |      |
| C22.0  | 31   | female |      |
| C22.0  | 30   | female |      |
| C22.0  | 122  | male   |      |
| C22.0  | 142  | male   |      |
| C22.0  | 782  | female |      |
| C22.0  | 706  | male   |      |
| C22.0  | 717  | female |      |
| C22.0  | 21   | female |      |
| C22.0  | 743  | male   |      |
| C22.0  | 250  | male   |      |
| K74.69 | 1826 | male   | 1826 |
| K74.69 | 1312 | male   | 1312 |
| K74.69 |      | female |      |
| K74.69 |      | male   |      |

[illegible]

[illegible]



[illegible]

[illegible]

[illegible]

[illegible]

[illegible]

[illegible]

[illegible]

[illegible]



[illegible]

[illegible]

[illegible]

[illegible]

[illegible]

[illegible]

[illegible]

[illegible]



[illegible]

[illegible]

[illegible]

[illegible]

[illegible]

[illegible]

[illegible]

[illegible]



[illegible]

[illegible]

[illegible]

[illegible]

|       |         |         |                |                                    |
|-------|---------|---------|----------------|------------------------------------|
| alive | unknown | LIHC-US | TCGA-UB- Liver | Liver cancer : Hepatocellular carc |
| alive | unknown | LIHC-US | TCGA-UB- Liver | Liver cancer : Hepatocellular carc |
| alive | unknown | LIHC-US | TCGA-UB- Liver | Liver cancer : Hepatocellular carc |
| alive | unknown | LIHC-US | TCGA-WJ- Liver | Liver cancer : Hepatocellular carc |
| alive | unknown | LIHC-US | TCGA-WQ Liver  | Liver cancer : Hepatocellular carc |
| alive | unknown | LIHC-US | TCGA-WQ Liver  | Liver cancer : Hepatocellular carc |
| alive | unknown | LIHC-US | TCGA-ZP- Liver | Liver cancer : Hepatocellular carc |
| alive | unknown | LIHC-US | TCGA-ZP- Liver | Liver cancer : Hepatocellular carc |
| alive | unknown | LIHC-US | TCGA-ZP- Liver | Liver cancer : Hepatocellular carc |
| alive | unknown | LIHC-US | TCGA-ZP- Liver | Liver cancer : Hepatocellular carc |
| alive | unknown | LIHC-US | TCGA-ZP- Liver | Liver cancer : Hepatocellular carc |
| alive | unknown | LIHC-US | TCGA-ZP- Liver | Liver cancer : Hepatocellular carc |
| alive | unknown | LIHC-US | TCGA-ZS- Liver | Liver cancer : Hepatocellular carc |
| alive | unknown | LIHM-FR | CHC1081 Liver  | Liver cancer : Hepatocellular carc |
| alive | unknown | LIHM-FR | CHC1085 Liver  | Liver cancer : Hepatocellular carc |
|       | unknown | LIHM-FR | CHC1097 Liver  | Liver cancer : Hepatocellular carc |
|       | unknown | LIHM-FR | CHC2351 Liver  | Liver cancer : Hepatocellular carc |

cinoma (Secondary to alcohol and adiposity)  
cinoma (Secondary to alcohol and adiposity)  
cinoma (Secondary to alcohol and adiposity)  
cinoma (Secondary to alcohol and adiposity)

inoma (Secondary to alcohol and adiposity)  
inoma (Secondary to alcohol and adiposity)  
inoma (Secondary to alcohol and adiposity)  
inoma (Secondary to alcohol and adiposity)

adenoma (Secondary to alcohol and adiposity)





:inoma (Secondary to alcohol and adiposity)

:inoma (Secondary to alcohol and adiposity)

:inoma (Secondary to alcohol and adiposity)  
:inoma (Secondary to alcohol and adiposity)

:inoma (Secondary to alcohol and adiposity)  
:inoma (Secondary to alcohol and adiposity)

:inoma (Secondary to alcohol and adiposity)

:inoma (Secondary to alcohol and adiposity)

:inoma (Secondary to alcohol and adiposity)  
:inoma (Secondary to alcohol and adiposity)









sinoma (Secondary to alcohol and adiposity)

sinoma (Secondary to alcohol and adiposity)













[illegible]

[illegible]

[illegible]











[illegible]



inoma (Secondary to alcohol and adiposity)

[illegible]



[illegible]





:inoma (Secondary to alcohol and adiposity)  
:inoma (Secondary to alcohol and adiposity)  
:inoma (Secondary to alcohol and adiposity)  
:inoma (Secondary to alcohol and adiposity)
