# Supplementary material for: Identifying Potential Tumor Antigens and Antigens-Related Subtypes in Hepatocellular Carcinoma for mRNA Vaccine Development
Source: J Oncol. 2022 Aug 29;2022:6851026. doi: 10.1155/2022/6851026 (PMC9444406; doi:10.1155/2022/6851026)
Supplement: Supplementary Materials — Table S1: clinical data from ICGC. Table S2: Differently Expressed Genes Analysis from cbioptrol. Differential Expression Analysis from GEPIA. Table S3: mutation Analysis of LIHC from cbioptrol. Supplementary Figure 1: KEGG and GO enrichment analyses of these candidate genes. Supplementary Figure 2: heatmaps of antigens in TCGA and CGGA cohort with cluster annotations. [file 6851026.f1.zip]

Archive with 5 entries (5 files):
- Supplemental figure1.pdf
- Supplemental figure2.pdf
- Table S1 (1).pdf
- Table S2 (1).pdf
- Table S3 (1).pdf
