# Supplementary figures and images for: Identifying Potential Tumor Antigens and Antigens-Related Subtypes in Hepatocellular Carcinoma for mRNA Vaccine Development
Source: Hindawi journal article supplement (doi:10.1155/2022/6851026), 2022-08-29

A

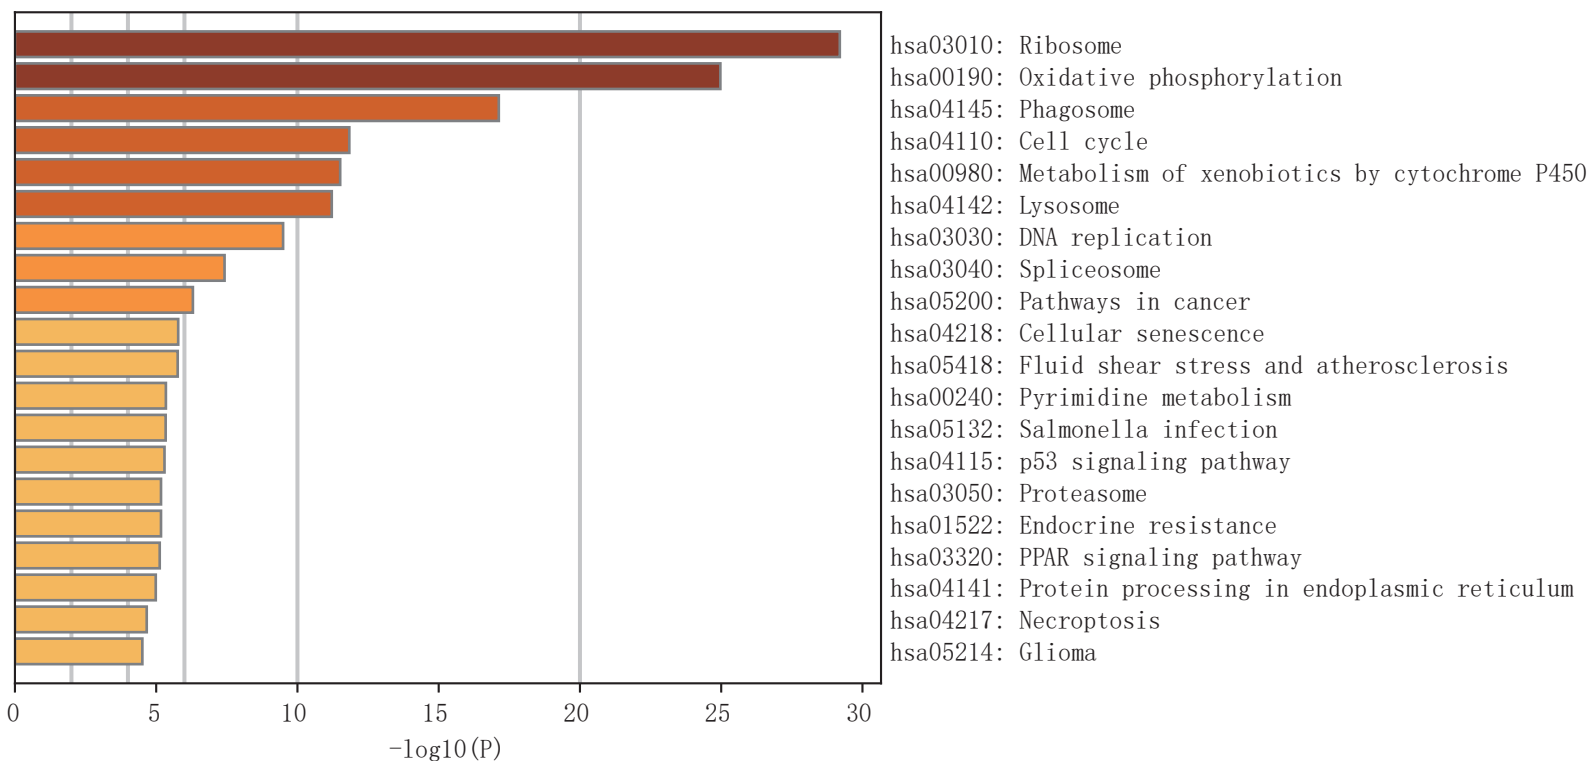

B

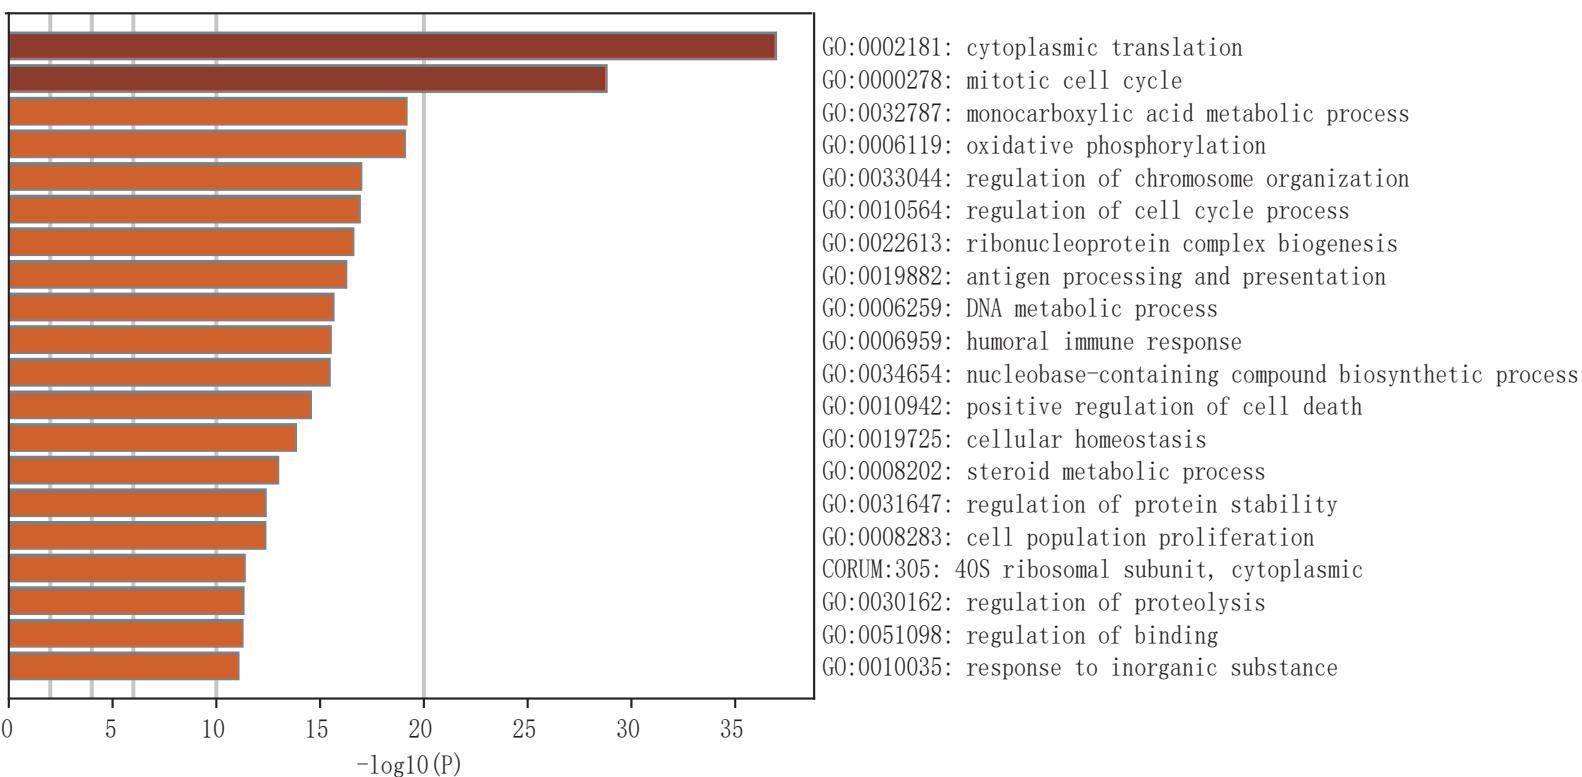

Supplement: f1 [file 6851026.f1.zip]

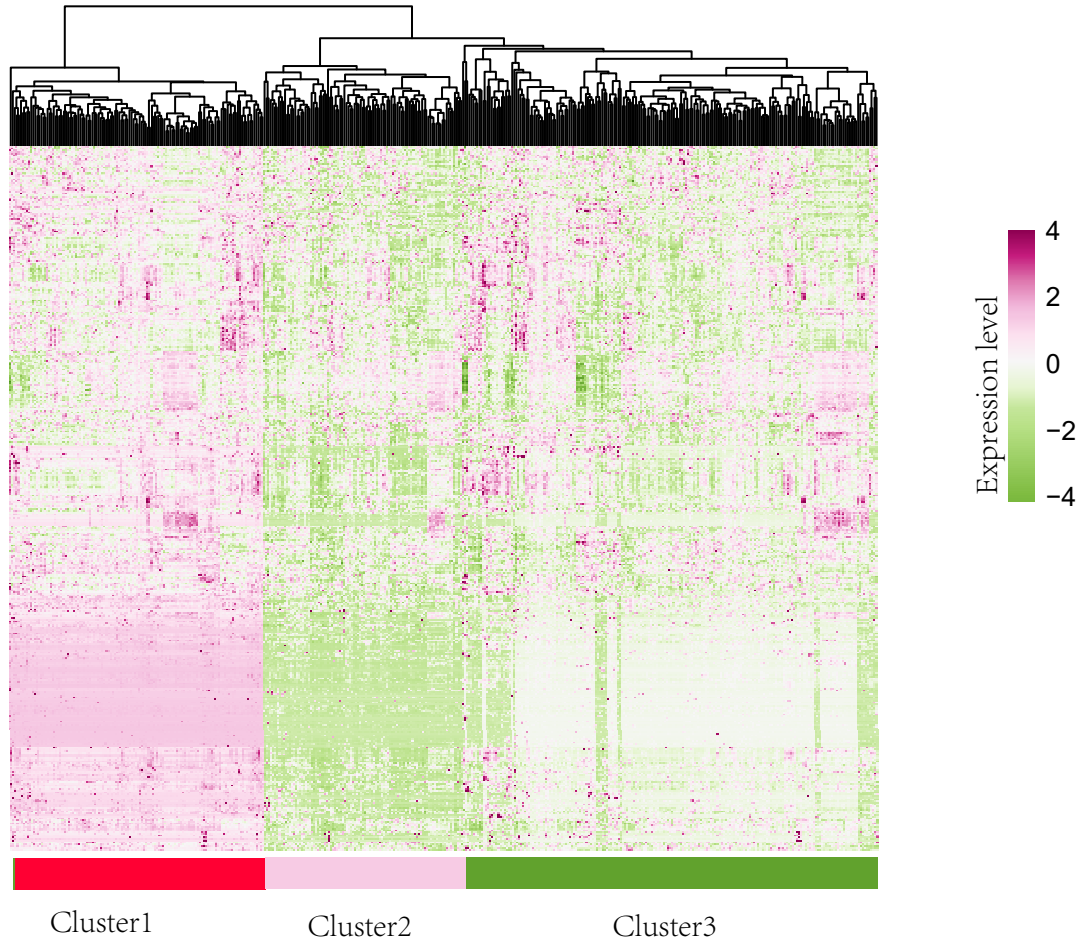

Supplement: f1 [file 6851026.f1.zip]
